# Supplementary material for: Atroposelective synthesis of N–N axially chiral pyrrolylamides by combined-acid catalytic Paal–Knorr reaction
Source: Royal Society of Chemistry journal article supplement (doi:10.1039/d4cc06721e), 2025-01-01

# Supporting Information

## Atroposelective Synthesis of N-N Axially Chiral Pyrrolylamides by Combined-acid Catalytic Paal-Knorr Reaction

Zhihuang Chen, Qi Chen, Guogang Tu, Xiaodong Xiong\*

School of Pharmacy, Nanchang University, Nanchang 330006, Jiangxi, China

E-mail: xiongd@ncu.edu.cn

### Table of contents

|                |                                                     |
|----------------|-----------------------------------------------------|
| <b>S2–S11</b>  | <b>Experimental procedures</b>                      |
| <b>S11–S47</b> | <b>Physical data</b>                                |
| <b>S48</b>     | <b>References</b>                                   |
| <b>S49–S87</b> | <b><sup>1</sup>H and <sup>13</sup>C NMR Spectra</b> |

### **(A) General information**

Commercially available reagents were used directly without further purification. For others, we prepared them in suitable reaction conditions. NMR spectra were recorded on a Bruker ADVANCE III 400MHz spectrometer ( $^1\text{H}$  NMR: 400 MHz,  $^{13}\text{C}$  NMR: 100 MHz). Chemical shifts ( $\delta$ ) were reported in ppm relative to  $\text{CDCl}_3$  ( $\delta$  7.26) for the  $^1\text{H}$  NMR and to  $\text{CDCl}_3$  ( $\delta$  77.16) for the  $^{13}\text{C}$  NMR measurements. Mass spectra were recorded on Thermo Finnigan MAT 95 XL spectrometer and Bruker solariX 9.4 Tesla FTICR spectrometer. GC/MS analysis was conducted on a Shimadzu GCMSQP2010 instrument equipped with a Restec-5HT column (30 m  $\times$  0.25 mm, Hewlett-Packard). IR spectra were recorded on a PerkinElmer FT-IR spectrophotometer and reported in terms of wavenumber of absorption ( $\text{cm}^{-1}$ ). Flash column chromatography was performed on 300-400 mesh silica gel from Qingdao Haiyang Chemical Co., Ltd. Reactions were monitored by thin-layer chromatography (TLC) using 254 nm UV light to visualize the progress of the reactions.

## (B) General procedure for the synthesis of the substrate

### Typical procedure for the synthesis of hydrazines 1

Substrates **1** could be conveniently synthesized according to the known literature procedures.<sup>1,2</sup> Their <sup>1</sup>H NMR spectroscopic and physical data were compared with reporting data, ensuring correct structures.

### Typical procedure for the synthesis of 1,4-diketones 2

Substrates **2** could be synthesized according to the known literature procedures.<sup>3</sup> Their <sup>1</sup>H NMR spectroscopic and physical data were compared with reporting data, ensuring correct structures.

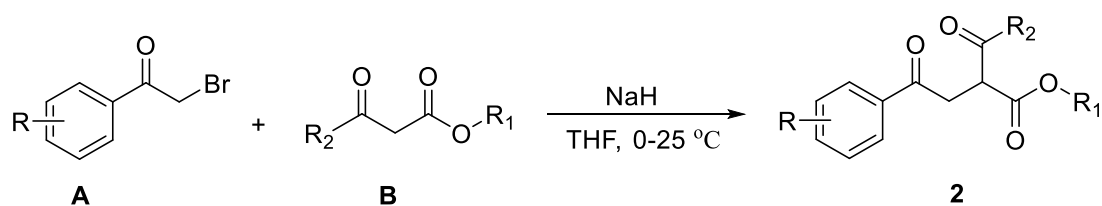

### General procedure:

To a solution of sodium hydride (60% dispersion in mineral oil) (400 mg, 11 mmol) in anhydrous THF (20 mL) was slowly added the solution of methyl acetoacetate **B** (1.16 g, 10 mmol) in THF (10 mL) at 0 °C. The reaction mixture was stirred at 0 °C for 0.5 h. Then, a solution of 2-bromo-1-phenylethan-1-one **A** (10 mmol) in THF (5 mL) was added to the mixture, which was stirred at room temperature for another 12 h. After the completion of the reaction which was indicated by TLC, the reaction mixture was quenched with H<sub>2</sub>O and the aqueous layer was extracted with EtOAc (3×30 mL). The combined organic layers were dried over anhydrous Na<sub>2</sub>SO<sub>4</sub> and then concentrated under reduced pressure. Then the crude product was purified by silica gel column chromatography to give 1,4-diketones **2**

**(C) Table S1. Optimization of reaction conditions<sup>a</sup>**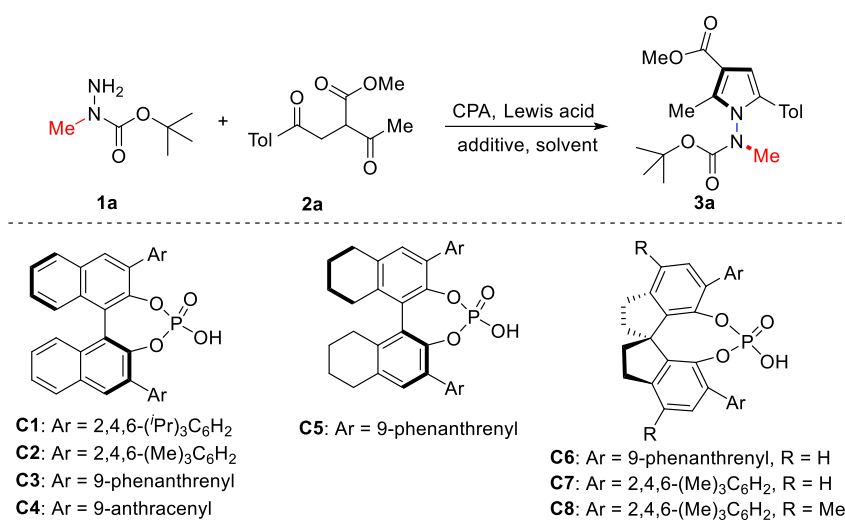

| entry | CPA       | solvent                         | Lewis acid           | T (°C) | additive                        | yield (%) | ee (%) <sup>b</sup> |
|-------|-----------|---------------------------------|----------------------|--------|---------------------------------|-----------|---------------------|
| 1     | -         | toluene                         | Fe(OTf) <sub>3</sub> | 25     | 4Å MS                           | 70        | 0                   |
| 2     | <b>C1</b> | toluene                         | -                    | 25     | 4Å MS                           | 80        | -1                  |
| 3     | <b>C1</b> | toluene                         | Fe(OTf) <sub>3</sub> | 25     | 4Å MS                           | 90        | -6                  |
| 4     | <b>C2</b> | toluene                         | Fe(OTf) <sub>3</sub> | 25     | 4Å MS                           | 92        | -53                 |
| 5     | <b>C3</b> | toluene                         | Fe(OTf) <sub>3</sub> | 25     | 4Å MS                           | 93        | -65                 |
| 6     | <b>C4</b> | toluene                         | Fe(OTf) <sub>3</sub> | 25     | 4Å MS                           | 60        | -46                 |
| 7     | <b>C5</b> | toluene                         | Fe(OTf) <sub>3</sub> | 25     | 4Å MS                           | 70        | -50                 |
| 8     | <b>C6</b> | toluene                         | Fe(OTf) <sub>3</sub> | 25     | 4Å MS                           | 92        | 53                  |
| 9     | <b>C7</b> | toluene                         | Fe(OTf) <sub>3</sub> | 25     | 4Å MS                           | 90        | 85                  |
| 10    | <b>C8</b> | toluene                         | Fe(OTf) <sub>3</sub> | 25     | 4Å MS                           | 94        | 87                  |
| 11    | <b>C8</b> | toluene                         | Fe(OTf) <sub>3</sub> | 25     | 5Å MS                           | 70        | 73                  |
| 12    | <b>C8</b> | toluene                         | Fe(OTf) <sub>3</sub> | 25     | 3Å MS                           | 90        | 60                  |
| 13    | <b>C8</b> | toluene                         | Fe(OTf) <sub>3</sub> | 25     | MgSO <sub>4</sub>               | 92        | 79                  |
| 14    | <b>C8</b> | toluene                         | Fe(OTf) <sub>3</sub> | 25     | Na <sub>2</sub> SO <sub>4</sub> | 88        | 72                  |
| 15    | <b>C8</b> | toluene                         | Fe(OTf) <sub>3</sub> | 25     | -                               | 82        | 76                  |
| 16    | <b>C8</b> | CHCl <sub>3</sub>               | Fe(OTf) <sub>3</sub> | 25     | 4Å MS                           | 10        | 2                   |
| 17    | <b>C8</b> | CH <sub>2</sub> Cl <sub>2</sub> | Fe(OTf) <sub>3</sub> | 25     | 4Å MS                           | 30        | 40                  |
| 18    | <b>C8</b> | CCl <sub>4</sub>                | Fe(OTf) <sub>3</sub> | 25     | 4Å MS                           | 85        | 72                  |
| 19    | <b>C8</b> | hexane                          | Fe(OTf) <sub>3</sub> | 25     | 4Å MS                           | 88        | 70                  |
| 20    | <b>C8</b> | toluene                         | Fe(OTf) <sub>3</sub> | 0      | 4Å MS                           | 96        | 93                  |
| 21    | <b>C8</b> | toluene                         | Fe(OTf) <sub>3</sub> | -20    | 4Å MS                           | 94        | 92                  |
| 22    | <b>C8</b> | toluene                         | FeCl <sub>3</sub>    | 0      | 4Å MS                           | 85        | 20                  |
| 23    | <b>C8</b> | toluene                         | Cu(OTf) <sub>2</sub> | 0      | 4Å MS                           | 70        | 30                  |
| 24    | <b>C8</b> | toluene                         | In(OTf) <sub>3</sub> | 0      | 4Å MS                           | 86        | 35                  |
| 25    | <b>C8</b> | toluene                         | Sc(OTf) <sub>3</sub> | 0      | 4Å MS                           | 92        | 87                  |
| 26    | <b>C8</b> | toluene                         | Bi(OTf) <sub>3</sub> | 0      | 4Å MS                           | 94        | 77                  |
| 27    | <b>C8</b> | toluene                         | -                    | 0      | 4Å MS                           | 82        | 24                  |

<sup>a</sup> Reaction conditions: **1a** (0.0375 mmol), **2a** (0.025 mmol), catalyst (10 mol%), Lewis acid (10 mol%), additivity (20 mg), solvent (1.0 mL) at given temperature for 8 h. <sup>b</sup> Determined by HPLC analysis.

### (D) General procedure for the asymmetric synthesis of axially chiral N-N amide-pyrrole 3

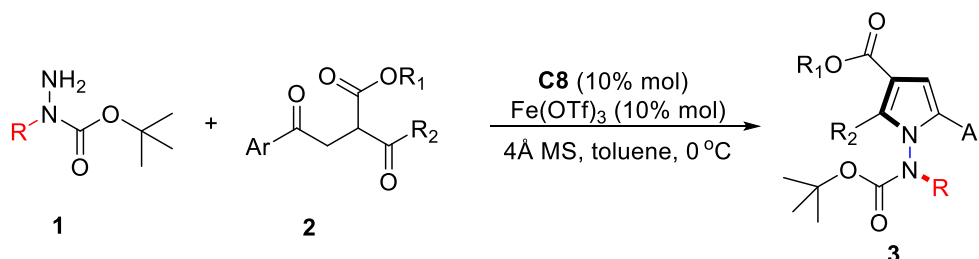

Hydrazide **1** (0.075 mmol, 1.5 eq) was added to a solution of 1,4-diketones **2** (0.05 mmol, 1.0 eq), **C8** (10 mol%),  $\text{Fe}(\text{OTf})_3$  (10 mol%), and 4 Å MS (40 mg) in toluene (2.0 mL) at 0 °C. The reaction was stirred for 8 h until the 1,4-diketones **2** was fully consumed (monitored by TLC), then the mixture was concentrated under reduced pressure and purified by flash chromatography eluted with PE/EA to afford the corresponding axially chiral N-N amide-pyrroles product **3**.

### (E) General procedure for gram-scale reaction

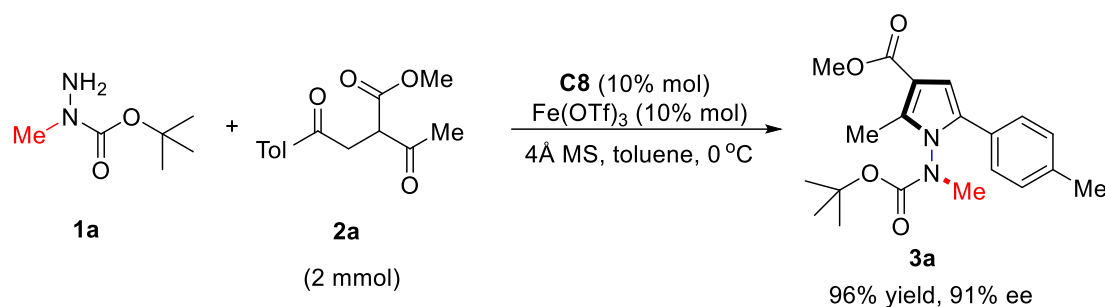

Hydrazide **1a** (3 mmol, 1.5 eq) was added to a solution of 1,4-diketones **2a** (2 mmol, 1.0 eq), **C8** (10 mol%),  $\text{Fe}(\text{OTf})_3$  (10 mol%), and 4 Å MS (1.2 g) in toluene (60 mL) at 0 °C. The reaction was stirred for 8 h until the 1,4-diketones **2** was fully consumed (monitored by TLC), then the mixture was concentrated under reduced pressure and purified by flash chromatography eluted with PE/EA to afford the corresponding axially chiral N-N amide-pyrrole product **3a** (687.4 mg, 96% yield, 91% ee).

### (F) Synthetic transformations

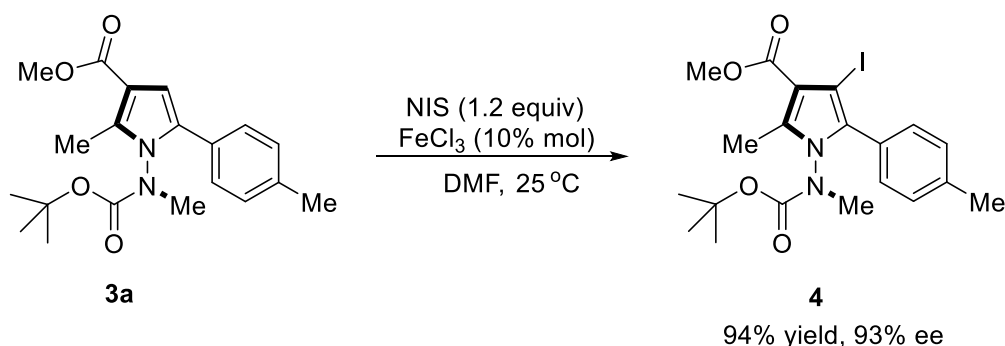

To a dry round-bottom flask equipped with a magnetic stir bar, **3a** (35.8 mg, 0.1 mmol) was dissolved in DMF (2 mL). Then  $\text{FeCl}_3$  (10 mol%) and NIS (1.2 eq) were added to

the mixture at 25 °C. After the completion of the reaction which was indicated by TLC, H<sub>2</sub>O (5 mL) was added and the mixture was extracted with EtOAc (3×10 mL). The combined organic layers were washed with brine, dried with Na<sub>2</sub>SO<sub>4</sub> and concentrated under reduced pressure. Further purification by flash column chromatography on silica gel to provide product **4** (45.5 mg, 94% yield, 93% ee).

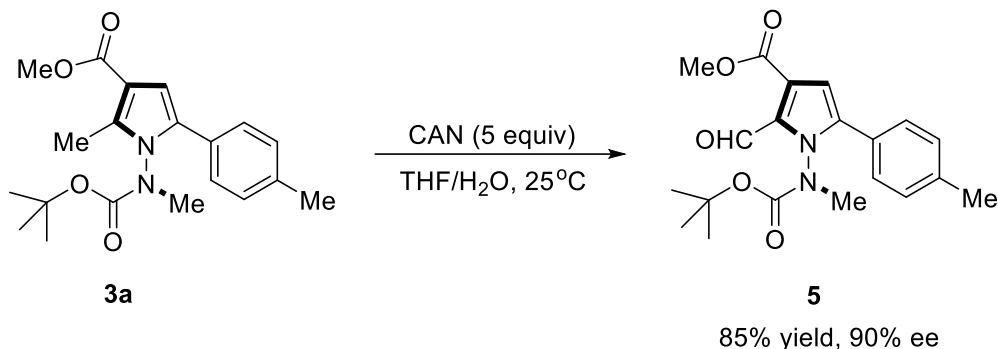

To a dry round-bottom flask equipped with a magnetic stir bar, **3a** (35.8 mg, 0.1 mmol) was dissolved in THF (4 mL) and H<sub>2</sub>O (0.4 mL) at 25 °C. Then ceric ammonium nitrate (CAN) (274 mg, 0.5 mmol) was added in small portions to the mixture. After the completion of the reaction which was indicated by TLC, H<sub>2</sub>O (10 mL) was added and the mixture was extracted with EtOAc (3×10 mL). The combined organic layers were washed with brine, dried with Na<sub>2</sub>SO<sub>4</sub> and concentrated under reduced pressure. Further purification by flash column chromatography on silica gel to provide product **5** (31.6 mg, 85% yield, 90% ee).

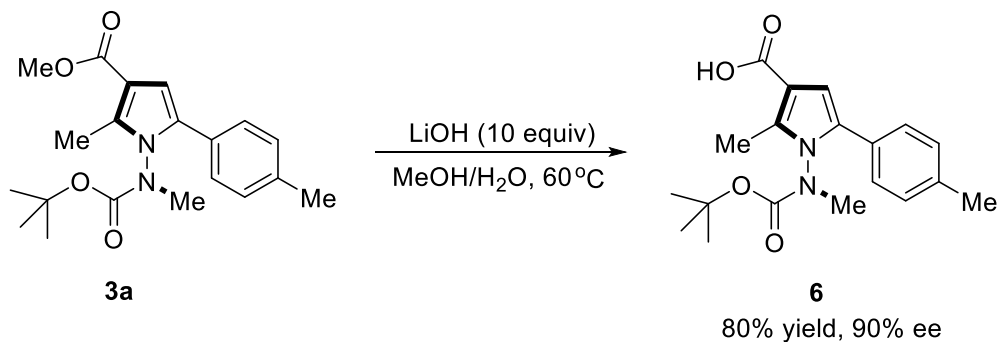

To a dry round-bottom flask equipped with a magnetic stir bar, **3a** (35.8 mg, 0.1 mmol) was dissolved in MeOH (1 mL) and H<sub>2</sub>O (1 mL). Then LiOH (10 eq) was added to the mixture, and the reaction was stirred at 60 °C. After the completion of the reaction which was indicated by TLC, H<sub>2</sub>O (5 mL) was added and the mixture was extracted with EtOAc (3×10 mL). The combined organic layers were washed with brine, dried with Na<sub>2</sub>SO<sub>4</sub> and concentrated under reduced pressure. Further purification by flash column chromatography on silica gel to provide product **6** (27.5 mg, 80% yield, 90% ee).

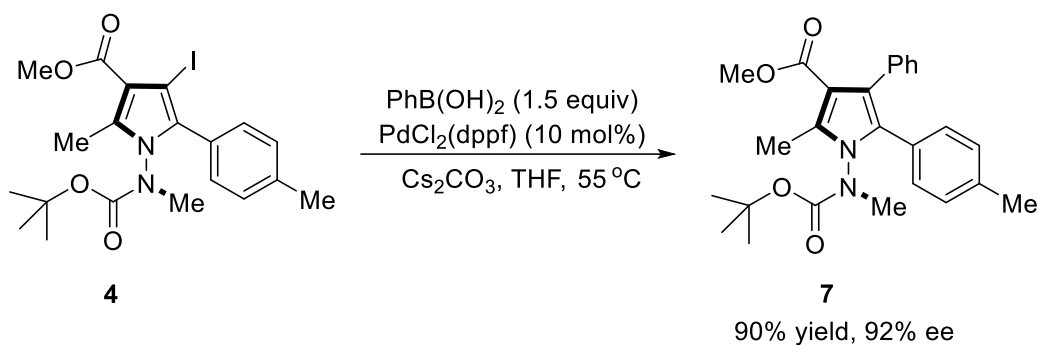

Under Ar atmosphere, to a dry round-bottom flask equipped with a magnetic stir bar, **4** (48.4 mg, 0.1 mmol),  $\text{PdCl}_2(\text{dppf})$  (7.4 mg, 0.01 mmol),  $\text{Cs}_2\text{CO}_3$  (65.2 mg, 0.2 mmol), boronic acid (18.3 mg, 0.15 mmol) was added in THF (3 mL). Then the reaction mixture was stirred at 55 °C for 3 h. After cooling to room temperature,  $\text{H}_2\text{O}$  (5 mL) was added. The suspension was filtered through a pad of Celite washing with ethyl acetate (5 mL) and filtrate was extracted with EtOAc (3×10 mL). The combined organic layers were washed with brine, dried with  $\text{Na}_2\text{SO}_4$  and concentrated under reduced pressure. The residual crude product was chromatographed on silica gel to give the product **7** (31.6 mg, 90% yield, 92% ee).

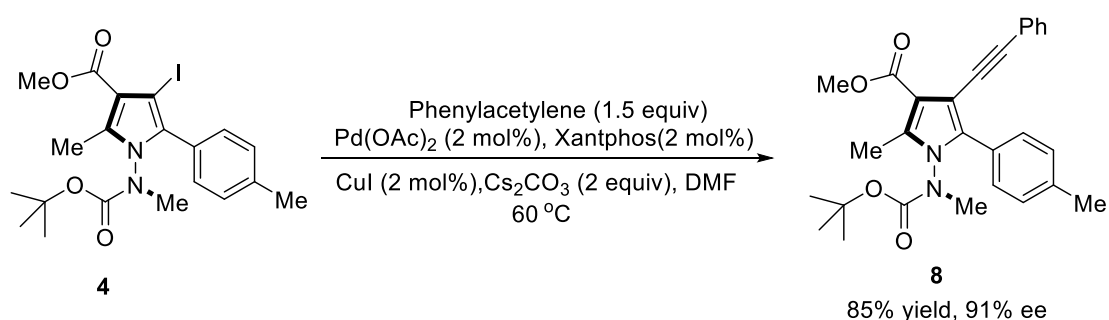

Under Ar atmosphere, to a dry round-bottom flask equipped with a magnetic stir bar, **4** (48.4 mg, 0.1 mmol),  $\text{Pd(OAc)}_2$  (0.48 mg, 0.002 mmol),  $\text{CuI}$  (0.38 mg, 0.002 mmol), Xantphos (1.16 mg, 0.002 mmol),  $\text{Cs}_2\text{CO}_3$  (65.2 mg, 0.2 mmol), ethynylbenzene (15.3 mg, 0.15 mmol) was added in DMF (3 mL). Then the reaction mixture was stirred at 60 °C for 3 h. After cooling to room temperature,  $\text{H}_2\text{O}$  (10 mL) was added. The suspension was filtered through a pad of celite, washing and then extracted with EtOAc (3×10 mL). The combined organic layers were washed with brine, dried with  $\text{Na}_2\text{SO}_4$  and concentrated under reduced pressure. The residual crude product was chromatographed on silica gel to give the product **8** (38.9 mg, 85% yield, 91% ee).

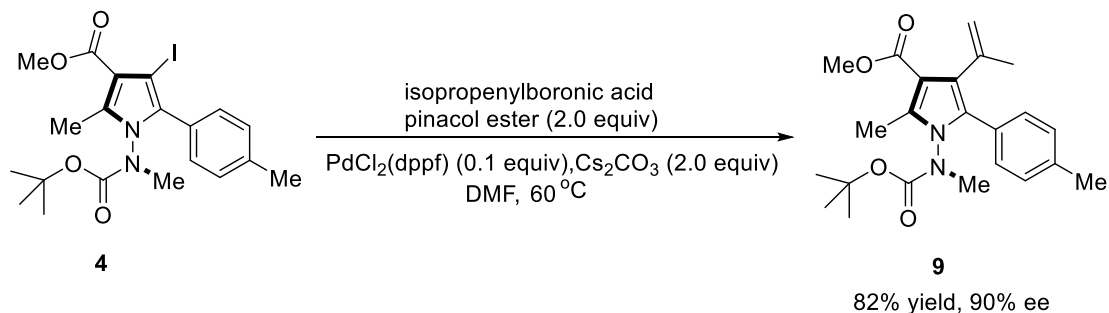

Under Ar atmosphere, to a dry round-bottom flask equipped with a magnetic stir bar, **4** (48.4 mg, 0.1 mmol), PdCl<sub>2</sub>(dppf) (7.4 mg, 0.01 mmol), Cs<sub>2</sub>CO<sub>3</sub> (65.2 mg, 0.2 mmol), isopropenylboronica acid pinacol ester (33.6 mg, 0.2 mmol) was added in THF (3 mL). Then the reaction mixture was stirred at 50°C for 2 h. After cooling to room temperature, H<sub>2</sub>O (5 mL) was added. The suspension was filtered through a pad of celite, washing and then extracted with EtOAc (3×10 mL). The combined organic layers were washed with brine, dried with Na<sub>2</sub>SO<sub>4</sub> and concentrated under reduced pressure. The residual crude product was chromatographed on silica gel to give the product **9** (32.6 mg, 82% yield, 90% ee).

### (G) Unsuccessful examples

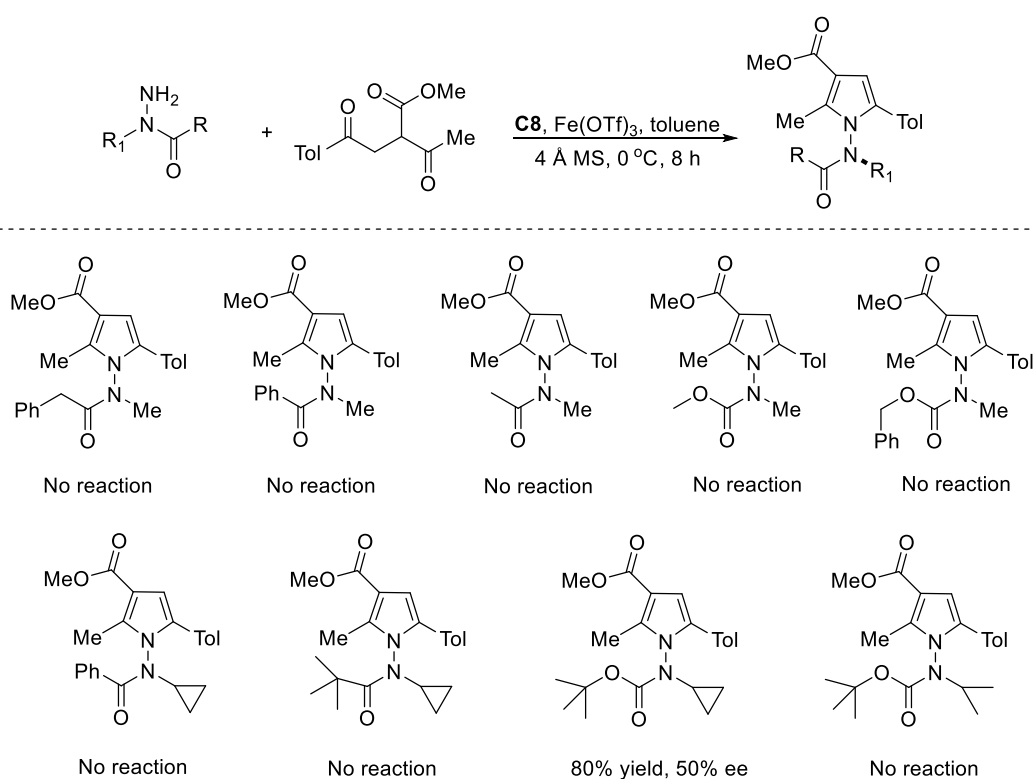

### (H) Mechanistic studies

To a flame-dried Schlenk tube was added **C8** (0.01 mmol) and Fe(OTf)<sub>3</sub> (0.01 mmol) and CDCl<sub>3</sub> (0.5 mL). After 30 min stirring at rt, the solution was transferred to a NMR tube and the <sup>31</sup>P NMR was taken, a new peak was transferred from -9.0 ppm to -9.4 ppm.



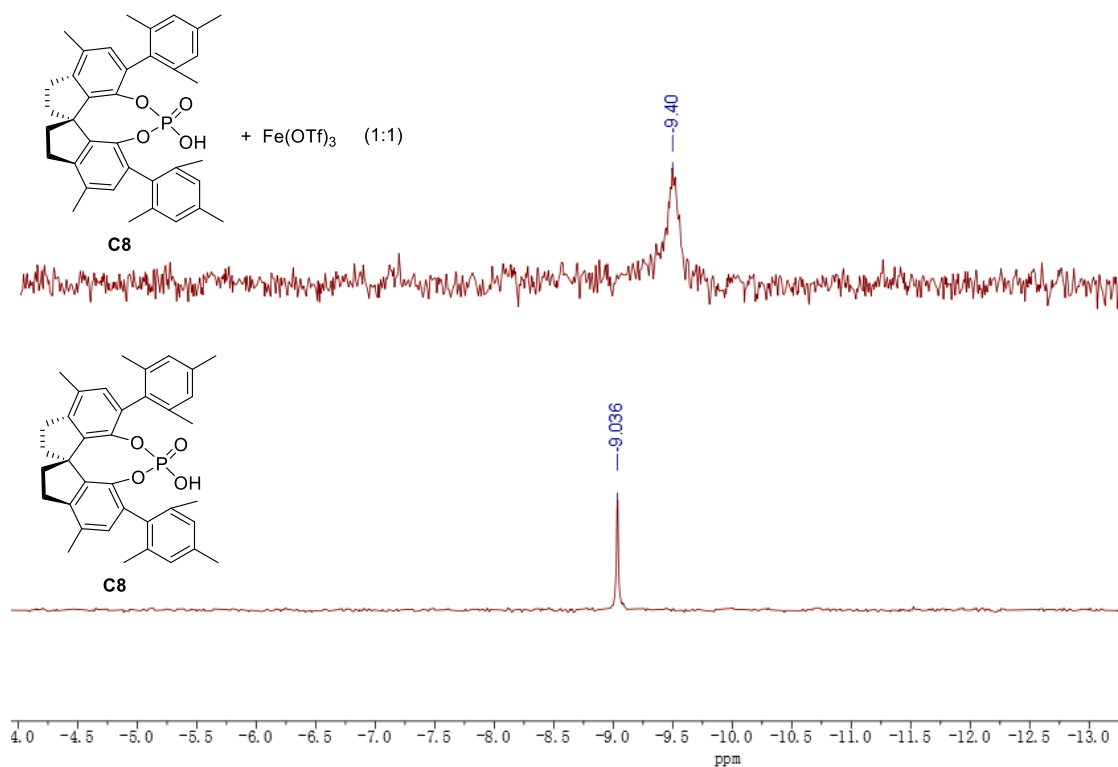

**Fig. 1**  $^{31}\text{P}$  NMR spectra of **C8** and binary-acid **C8/Fe(OTf)<sub>3</sub>**

To a flame-dried Schlenk tube was added **C8** (0.01 mmol),  $\text{Fe}(\text{OTf})_3$  (0.01 mmol), and  $\text{CH}_2\text{Cl}_2$  (0.5 mL). After 30 min stirring at rt, an aliquot was diluted with  $\text{CH}_3\text{CN}$  ( $\text{CH}_3\text{CN}:\text{CH}_2\text{Cl}_2 = 5:1$ ) and subjected to analysis by ESI-MS.

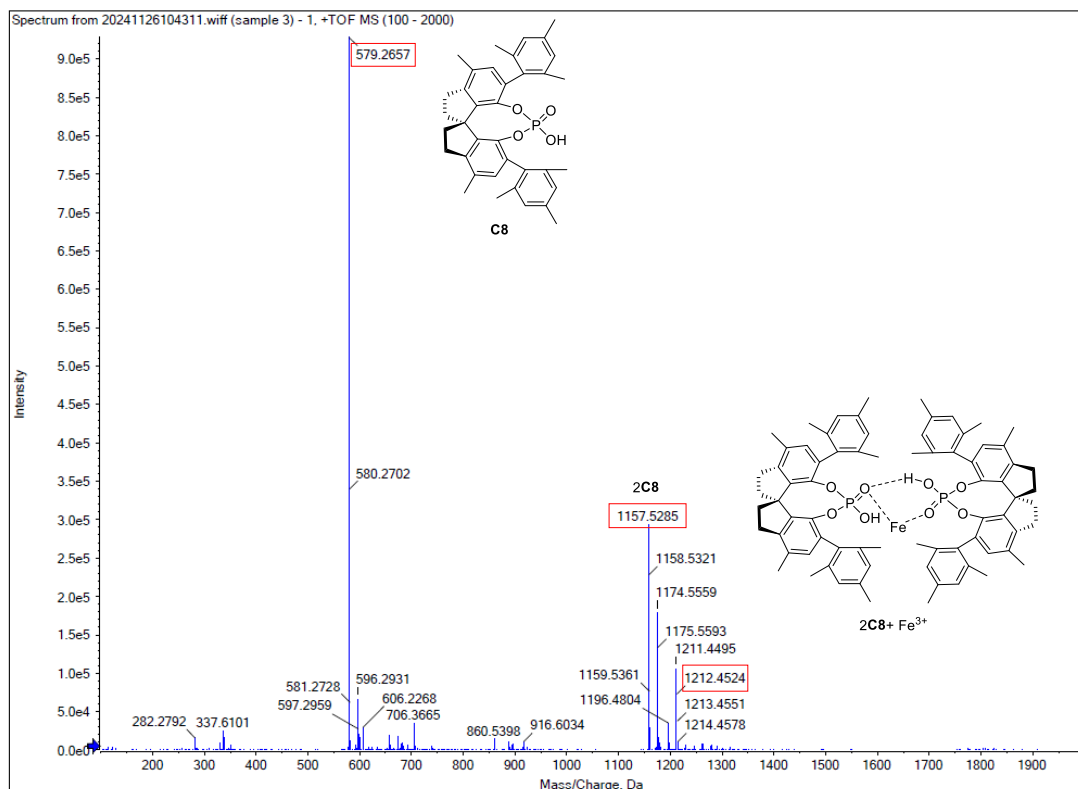

**Fig. 2** ESI-MS of binary-acid **C8/Fe(OTf)<sub>3</sub>**

To a flame-dried Schlenk tube was added **C8** (0.01 mmol), Fe(OTf)<sub>3</sub> (0.01 mmol), and CH<sub>2</sub>Cl<sub>2</sub> (0.5 mL). After 30 min stirring at rt, **1a** (0.01 mmol) and **2a** (0.01 mmol) were added, then stirred for another 30 min, an aliquot was diluted with CH<sub>3</sub>CN (CH<sub>3</sub>CN:CH<sub>2</sub>Cl<sub>2</sub> = 5:1) and subjected to analysis by ESI-MS.

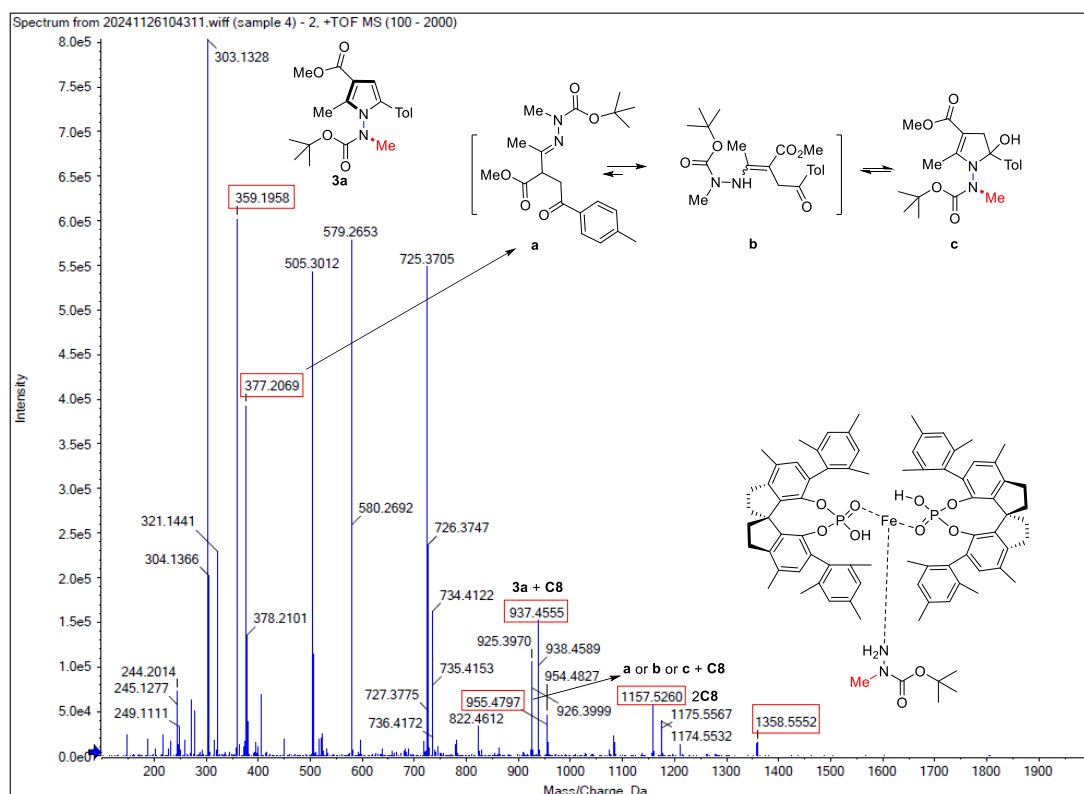

**Fig. 3** ESI-MS of binary-acid **C8**/Fe(OTf)<sub>3</sub> catalyzed the Paal-Knorr reaction of **1a** and **2a**

**The amount of Fe(OTf)<sub>3</sub> was investigated for the enantioselectivity of the Paal-Knorr reaction**

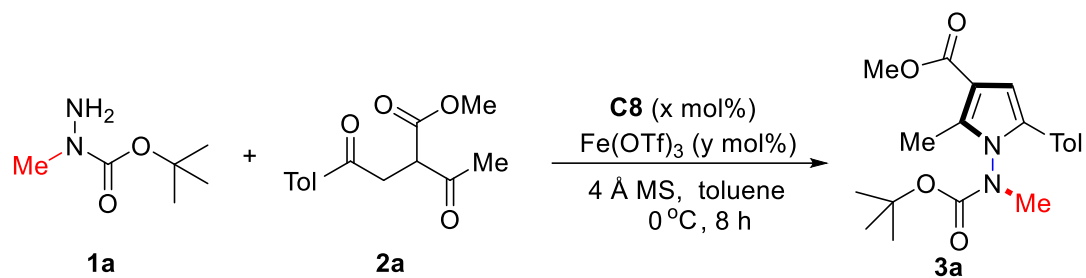

| entry | x  | y   | yield (%) | ee (%) |
|-------|----|-----|-----------|--------|
| 1     | 10 | 0   | 82        | 24     |
| 2     | 10 | 2.5 | 89        | 32     |
| 3     | 10 | 5   | 92        | 75     |
| 4     | 10 | 10  | 96        | 93     |
| 5     | 10 | 20  | 97        | 90     |
| 6     | 10 | 40  | 96        | 86     |
| 7     | 5  | 5   | 91        | 85     |

<sup>a</sup>Reactions were carried out with **1a** (0.075 mmol), **2a** (0.05 mmol), **C8** (x mol%), Fe(OTf)<sub>3</sub> (y mmol%), and 4 Å MS (40 mg) in toluene (2 mL) at 0 °C.

**(I) Analytical Data**

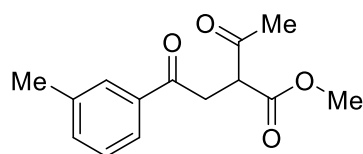

**methyl 2-(2-(3-methylphenyl)-2-oxoethyl)-3-oxopentanoate (2j)**

<sup>1</sup>H NMR (400 MHz, CDCl<sub>3</sub>) δ 2.21-2.43 (m, 6H), 3.43 (m, 1H), 3.54-3.75 (m, 4H), 4.14 (m, 1H), 7.27 (m, 2H), 7.68 (d, *J* = 7.6, 2H). <sup>13</sup>C NMR (100 MHz, CDCl<sub>3</sub>) δ 202.4, 197.2, 169.5, 138.5, 136.0, 134.3, 128.7, 128.6, 125.4, 53.6, 52.7, 37.5, 30.3, 21.3. HRMS (ESI) calcd for C<sub>14</sub>H<sub>16</sub>O<sub>4</sub> *m/z* [M+H]<sup>+</sup>: 249.1121, found: 249.1123.

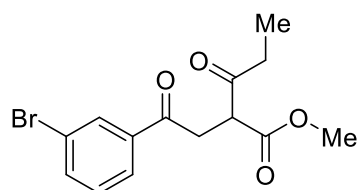

**methyl 2-(2-(3-bromophenyl)-2-oxoethyl)-3-oxopentanoate (2w)**

<sup>1</sup>H NMR (400 MHz, CDCl<sub>3</sub>) δ 1.11 (m, 3H), 2.79 (m, 2H), 3.39-3.59 (m, 1H), 3.61-3.86 (m, 4H), 4.12-4.27 (m, 1H), 7.35 (m, 1H), 7.70 (d, *J* = 8.0, 1H), 7.90 (d, *J* = 7.9, 1H), 8.09 (d, *J* = 2.1, 1H). <sup>13</sup>C NMR (100 MHz, CDCl<sub>3</sub>) δ 205.0, 196.1, 169.5, 137.9, 136.5, 131.4, 130.4, 126.8, 123.2, 52.9, 52.8, 37.7, 36.5, 7.8. HRMS (ESI) calcd for C<sub>14</sub>H<sub>15</sub>BrO<sub>4</sub> *m/z* [M+H]<sup>+</sup>: 327.0226, found: 327.0222.

## CPA catalysts

All chiral phosphoric acid catalysts are commercially available (C1-C7). Catalyst C8 had synthesized according to the known literature procedures.<sup>4</sup>

### Chiral phosphoric acid C8

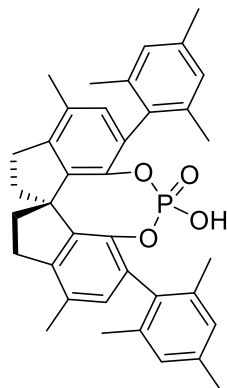

<sup>1</sup>H NMR (400 MHz, CDCl<sub>3</sub>) δ 1.98 (s, 6H), 2.05 (s, 8H), 2.18 (s, 6H), 2.28 (s, 8H), 2.82 (m, 2H), 2.96 (m, 2H), 6.48 (s, 1H), 6.73 (s, 4H), 6.82 (s, 2H). <sup>13</sup>C NMR (100 MHz, CDCl<sub>3</sub>) δ 142.9, 142.9, 141.2, 139.3, 139.3, 136.8, 136.4, 136.3, 133.6, 132.5, 132.5, 132.1, 132.1, 130.8, 128.6, 127.4, 60.4, 38.3, 28.9, 21.3, 21.0, 20.4, 18.5. <sup>31</sup>P NMR (162 MHz, CDCl<sub>3</sub>) δ -8.90. HRMS (ESI) calcd for C<sub>37</sub>H<sub>39</sub>O<sub>4</sub>P *m/z* [M+H]<sup>+</sup>: 579.2658, found: 579.2654.

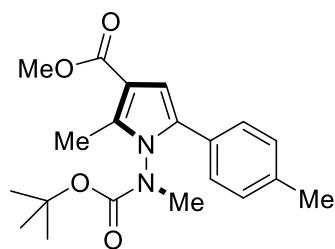

### (*R*)-methyl 1-((tert-butoxycarbonyl)(methyl)amino)-2-methyl-5-(*p*-tolyl)-1H-pyrrole-3-carboxylate (3a)

Colorless oil.  $[\alpha]_D^{25} = -67.9$  (*c* 0.44, CHCl<sub>3</sub>); <sup>1</sup>H NMR (400 MHz, CDCl<sub>3</sub>) δ 1.35 (s, 6H), 1.54 (s, 3H), 2.36 (s, 3H), 2.45 (s, 3H), 2.97 (s, 1H), 3.09 (s, 2H), 3.81 (s, 1H), 3.83 (s, 2H), 6.57-6.59 (m, 1H), 7.17-7.19 (m, 2H), 7.24-7.28 (m, 2H); <sup>13</sup>C NMR (100 MHz, CDCl<sub>3</sub>) δ 165.8, 165.7, 154.4, 154.2, 137.6, 137.5, 137.1, 136.9, 132.1, 129.5, 129.3, 128.4, 128.3, 128.0, 127.4, 110.6, 110.4, 107.6, 107.2, 82.5, 82.3, 51.1, 51.0, 38.7, 37.5, 28.3, 28.2, 21.4, 21.3, 10.6, 10.5. HRMS (ESI) calcd for C<sub>20</sub>H<sub>26</sub>N<sub>2</sub>O<sub>4</sub> *m/z* [M+H]<sup>+</sup>: 359.1965, found: 359.1956. Enantiomeric excess was found to be 93% by chiral HPLC (ChiralPak OD column, hexane/*i*-PrOH = 90:10, 1.0 ml/min, *t*<sub>major</sub> = 4.9 min, *t*<sub>minor</sub> = 4.3 min).

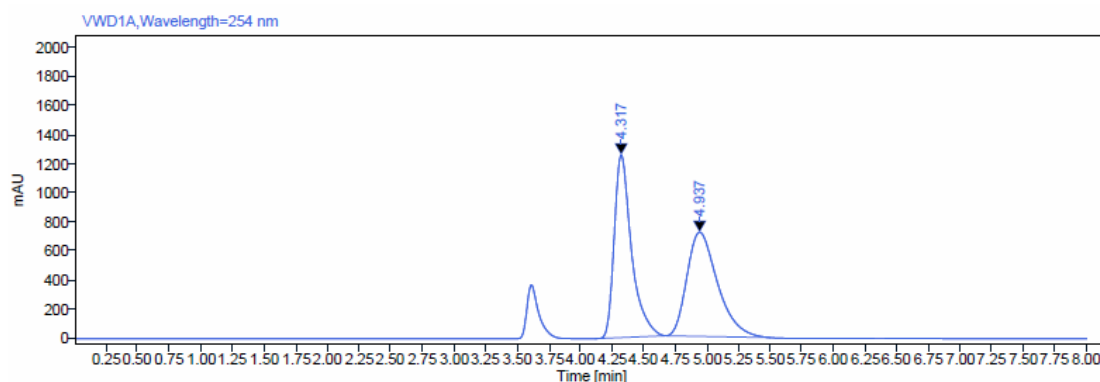

| RT [min] | Type | Width [min] | Area     | Height  | Area% |
|----------|------|-------------|----------|---------|-------|
| 4.317    | MM m | 0.56        | 11938.59 | 1257.02 | 49.71 |
| 4.937    | MM m | 0.83        | 12077.67 | 716.53  | 50.29 |

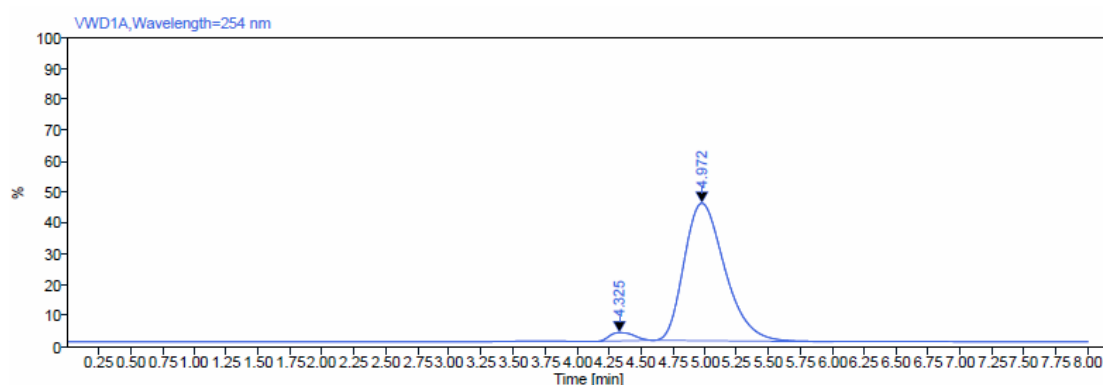

| RT [min] | Type | Width [min] | Area     | Height | Area% |
|----------|------|-------------|----------|--------|-------|
| 4.325    | MM m | 0.43        | 442.46   | 33.03  | 3.50  |
| 4.972    | MM m | 1.40        | 12214.41 | 549.68 | 96.50 |

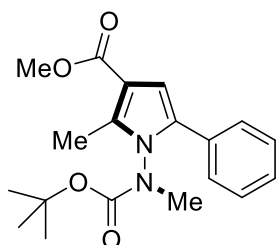

**(R)-methyl 1-((tert-butoxycarbonyl)(methyl)amino)-2-methyl-5-phenyl-1H-pyrrole-3-carboxylate(3b)**

Yellow oil.  $[\alpha]_D^{25} = -55.8$  (*c* 0.25,  $\text{CHCl}_3$ );  $^1\text{H NMR}$  (400 MHz,  $\text{CDCl}_3$ )  $\delta$  1.34 (s, 6H), 1.53 (s, 3H), 2.46 (s, 3H), 2.98 (s, 1H), 3.12 (s, 2H), 3.81 (s, 1H), 3.84 (s, 2H), 6.61-6.63 (m, 1H), 7.30-7.40 (m, 5H);  $^{13}\text{C NMR}$  (100 MHz,  $\text{CDCl}_3$ )  $\delta$  165.7, 165.6, 154.4, 154.2, 137.3, 137.2, 132.0, 131.3, 131.2, 128.8, 128.6, 128.1, 127.2, 127.5, 110.8, 110.5, 108.0, 107.6, 82.5, 82.4, 51.2, 51.1, 38.7, 37.6, 28.3, 28.1, 10.6, 10.5. HRMS (ESI) calcd for  $\text{C}_{19}\text{H}_{24}\text{N}_2\text{O}_4$   $m/z$   $[\text{M}+\text{H}]^+$ : 345.1809, found: 345.1807. Enantiomeric excess was found to be 91% by chiral HPLC (ChiralPak OD column, hexane/*i*-PrOH = 99:1, 1.0 ml/min,  $t_{\text{major}} = 18.7$  min,  $t_{\text{minor}} = 14.3$  min).

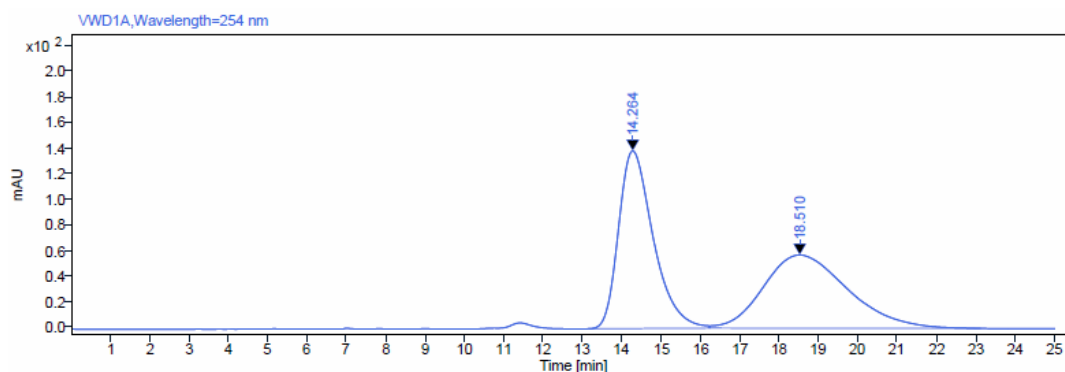

| RT [min] | Type | Width [min] | Area    | Height | Area% |
|----------|------|-------------|---------|--------|-------|
| 14.264   | MM m | 3.07        | 8503.22 | 138.88 | 49.98 |
| 18.510   | MM m | 6.89        | 8511.19 | 57.34  | 50.02 |

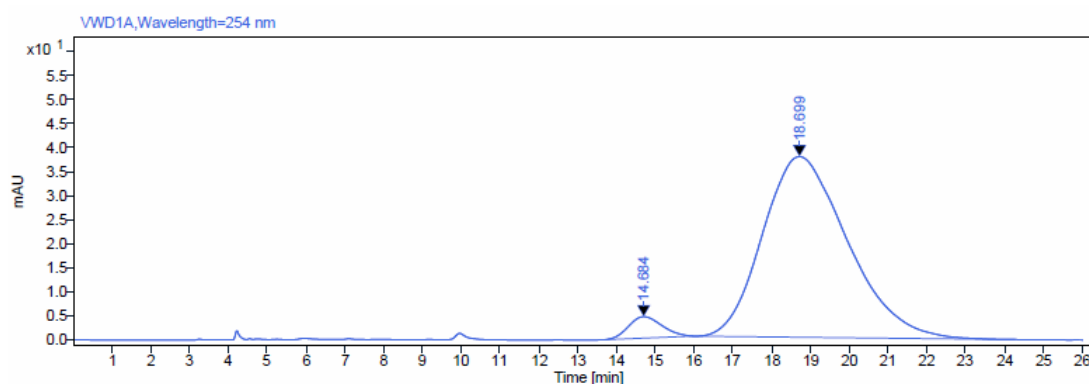

| RT [min] | Type | Width [min] | Area    | Height | Area% |
|----------|------|-------------|---------|--------|-------|
| 14.684   | MM m | 2.28        | 267.72  | 4.49   | 4.45  |
| 18.699   | MM m | 8.29        | 5748.87 | 37.80  | 95.55 |

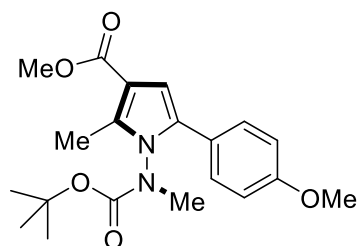

**(R)-methyl 1-((tert-butoxycarbonyl)(methyl)amino)-5-(4-methoxyphenyl)-2-methyl-1H-pyrrole-3-carboxylate (3c)**

Yellow oil.  $[\alpha]_D^{25} = -65.7$  (*c* 0.51,  $\text{CHCl}_3$ );  $^1\text{H NMR}$  (400 MHz,  $\text{CDCl}_3$ )  $\delta$  1.36 (s, 6H), 1.52 (s, 3H), 2.44 (s, 3H), 2.96 (s, 1H), 3.09 (m, 3H), 3.80 (s, 1H), 3.83 (s, 5H), 6.53-6.54 (m, 1H), 6.88-6.91 (m, 2H), 7.26-7.31 (m, 2H);  $^{13}\text{C NMR}$  (100 MHz,  $\text{CDCl}_3$ )  $\delta$  165.8, 165.7, 159.4, 159.3, 154.4, 154.3, 136.8, 136.6, 131.9, 129.7, 129.0, 123.8, 123.7, 114.2, 114.0, 110.5, 110.3, 107.3, 106.8, 82.5, 82.3, 55.5, 55.4, 51.1, 51.0, 38.7, 37.5, 28.6, 28.3, 28.2, 10.6, 10.5. HRMS (ESI) calcd for  $\text{C}_{20}\text{H}_{26}\text{N}_2\text{O}_5$   $m/z$   $[\text{M}+\text{H}]^+$ : 375.1914, found: 375.1905. Enantiomeric excess was found to be 90% by chiral HPLC (ChiralPak OD column, hexane/*i*-PrOH = 99:1, 1.0 ml/min,  $t_{\text{major}} = 28.3$  min,  $t_{\text{minor}} = 13.8$  min).

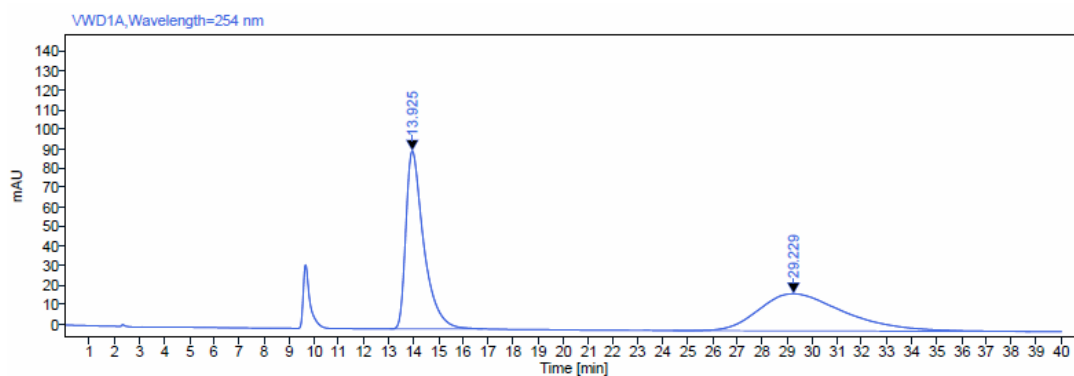

| RT [min] | Type | Width [min] | Area    | Height | Area% |
|----------|------|-------------|---------|--------|-------|
| 13.925   | BM m | 3.71        | 4560.17 | 91.44  | 50.01 |
| 29.229   | MM m | 14.34       | 4557.44 | 19.05  | 49.99 |

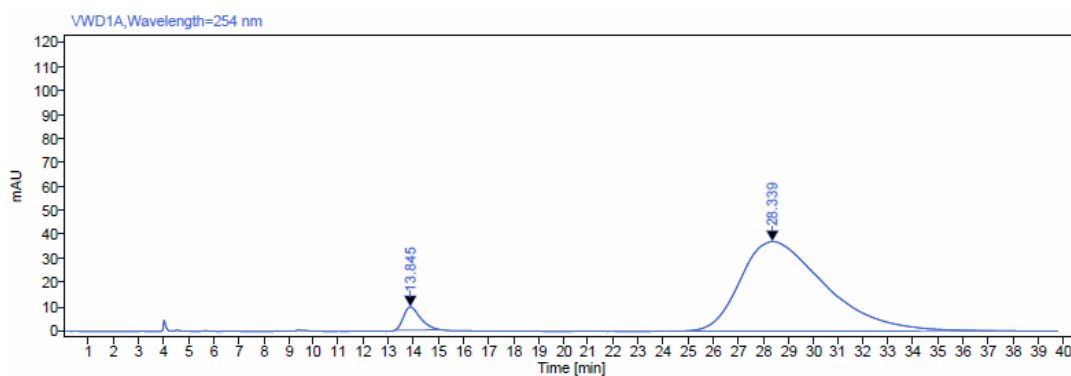

| RT [min] | Type | Width [min] | Area    | Height | Area% |
|----------|------|-------------|---------|--------|-------|
| 13.845   | MM m | 1.85        | 452.61  | 9.65   | 4.91  |
| 28.339   | BB   | 13.06       | 8772.80 | 37.32  | 95.09 |

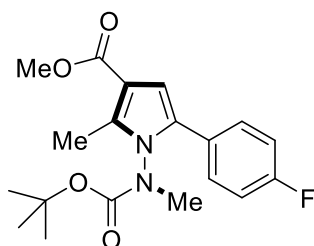

**(R)-methyl 1-((tert-butoxycarbonyl)(methyl)amino)-5-(4-fluorophenyl)-2-methyl-1H-pyrrole-3-carboxylate (3d)**

Pale yellow oil.  $[\alpha]_D^{25} = -69.2$  ( $c$  0.09,  $\text{CHCl}_3$ );  $^1\text{H NMR}$  (400 MHz,  $\text{CDCl}_3$ )  $\delta$  1.35 (s, 6H), 1.53 (s, 3H), 2.45 (s, 3H), 2.98 (s, 1H), 3.10 (m, 2H), 3.81 (s, 1H), 3.83 (s, 2H), 6.57-6.58 (m, 1H), 7.03-7.09 (m, 2H), 7.30-7.37 (m, 2H);  $^{13}\text{C NMR}$  (100 MHz,  $\text{CDCl}_3$ )  $\delta$  165.6, 165.6, 163.8, 163.7, 161.3, 161.2, 154.4, 154.1, 137.2, 137.0, 131.1 (2), 130.1, 130.0, 129.4 (2), 127.4 (3), 127.3, 115.9, 115.7, 115.5, 110.8, 110.5, 108.0, 107.6, 82.7, 82.5, 51.2, 51.1, 38.8, 37.6, 28.3, 28.2, 10.6, 10.5. HRMS (ESI) calcd for  $\text{C}_{19}\text{H}_{23}\text{FN}_2\text{O}_4$   $m/z$   $[\text{M}+\text{H}]^+$ : 363.1715, found: 363.1710. Enantiomeric excess was found to be 92% by chiral HPLC (ChiralPak OD column, hexane/*i*-PrOH = 99:1, 1.0 ml/min,  $t_{\text{major}} = 13.1$

min,  $t_{\text{minor}} = 8.7$  min).

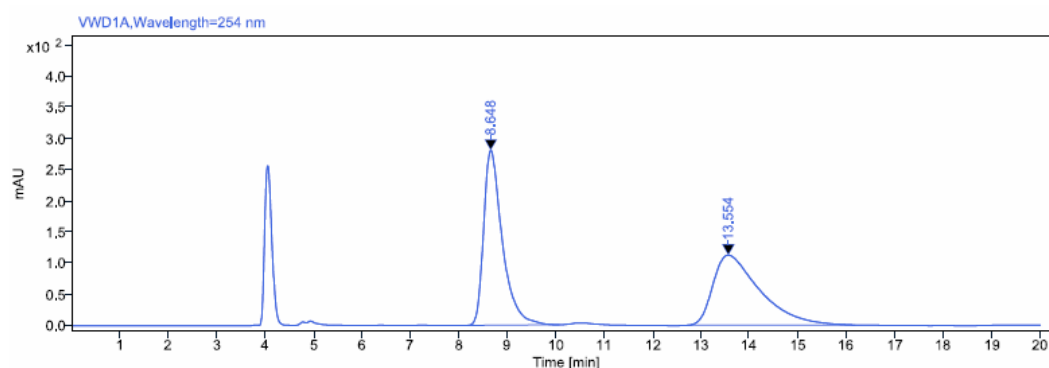

| RT [min] | Type | Width [min] | Area    | Height | Area% |
|----------|------|-------------|---------|--------|-------|
| 8,648    | BB   | 1,98        | 7547,00 | 281,32 | 50,06 |
| 13,554   | MM m | 3,44        | 7528,78 | 112,54 | 49,94 |

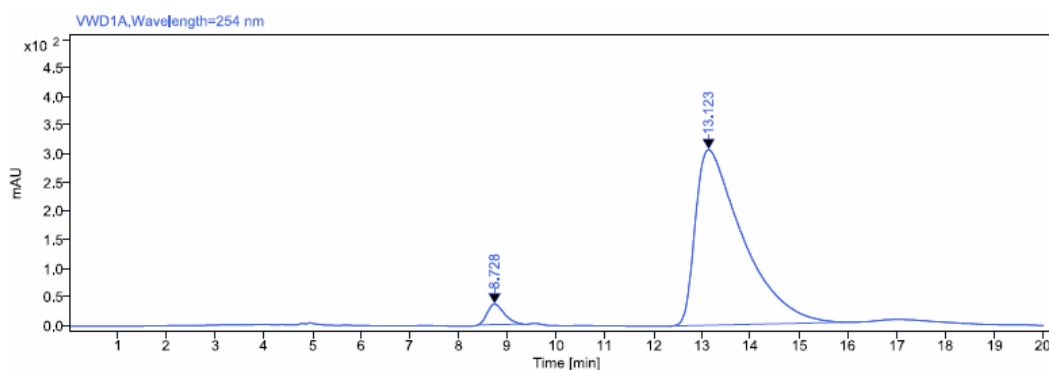

| RT [min] | Type | Width [min] | Area     | Height | Area% |
|----------|------|-------------|----------|--------|-------|
| 8,728    | MM m | 0,92        | 863,82   | 35,70  | 4,00  |
| 13,123   | BM m | 3,97        | 20746,60 | 306,70 | 96,00 |

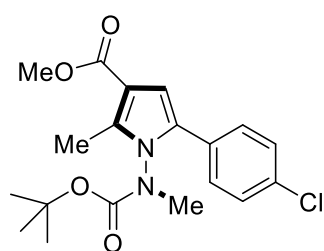

**(*R*)-methyl 1-((tert-butoxycarbonyl)(methyl)amino)-5-(4-chlorophenyl)-2-methyl-1H-pyrrole-3-carboxylate (3e)**

Colorless oil.  $[\alpha]_D^{25} = -56.8$  ( $c$  0.17,  $\text{CHCl}_3$ );  $^1\text{H NMR}$  (400 MHz,  $\text{CDCl}_3$ )  $\delta$  1.35 (s, 6H), 1.53 (s, 3H), 2.45 (s, 3H), 2.98 (s, 1H), 3.10 (m, 2H), 3.81 (s, 1H), 3.83 (s, 2H), 6.62 (d,  $J = 8.4$ , 1H), 7.26-7.36 (m, 4H);  $^{13}\text{C NMR}$  (100 MHz,  $\text{CDCl}_3$ )  $\delta$  165.5 (2), 154.4, 154.1, 137.6, 137.4, 133.7 (2), 130.9, 130.8, 129.7, 129.6, 129.3, 129.1, 128.9, 128.6, 111.0, 110.7, 108.4, 108.0, 82.8, 82.6, 51.2, 51.1, 38.8, 37.6, 28.3, 28.2, 10.6, 10.5. HRMS (ESI) calcd for  $\text{C}_{19}\text{H}_{23}\text{ClN}_2\text{O}_4$   $m/z$   $[\text{M}+\text{H}]^+$ : 379.1419, found: 379.1417. Enantiomeric excess was found to be 93% by chiral HPLC (ChiralPak OD column,



hexane/*i*-PrOH = 90:10, 1.0 ml/min,  $t_{\text{major}} = 5.4$  min,  $t_{\text{minor}} = 4.4$  min).

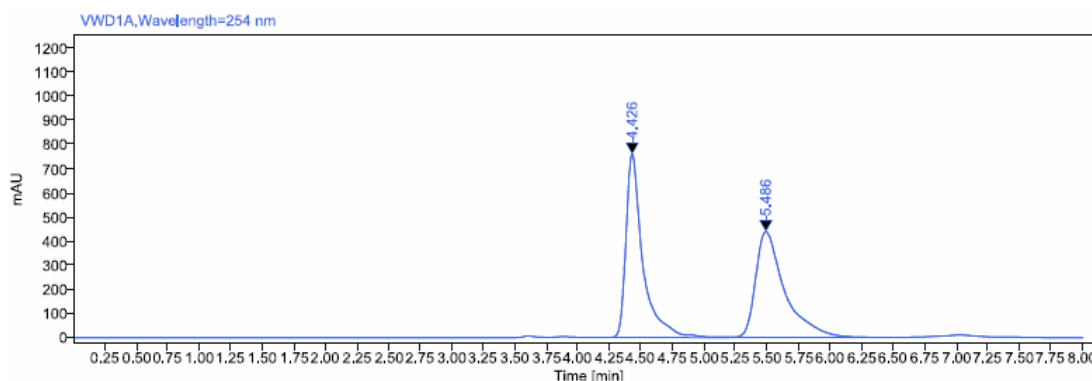

| RT [min] | Type | Width [min] | Area    | Height | Area% |
|----------|------|-------------|---------|--------|-------|
| 4.426    | BV   | 1.05        | 7082.92 | 762.39 | 49.97 |
| 5.486    | VV   | 1.32        | 7090.49 | 440.81 | 50.03 |

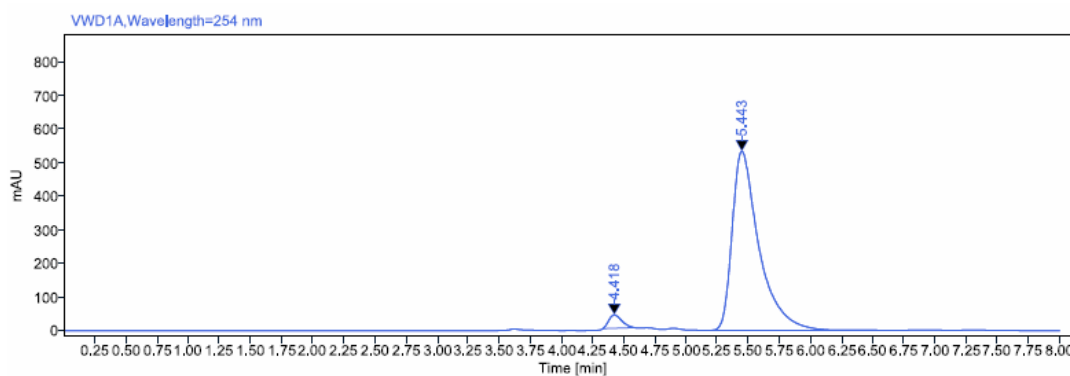

| RT [min] | Type | Width [min] | Area    | Height | Area% |
|----------|------|-------------|---------|--------|-------|
| 4.418    | MM m | 0.25        | 286.76  | 39.85  | 3.44  |
| 5.443    | BV   | 1.46        | 8050.79 | 533.72 | 96.56 |

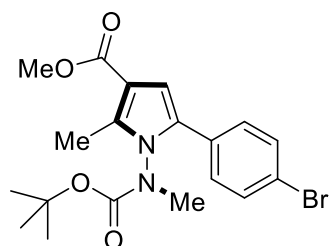

**(*R*)-methyl 5-(4-bromophenyl)-1-((tert-butoxycarbonyl)(methyl)amino)-2-methyl-1H-pyrrole-3-carboxylate (3f)**

Yellow oil.  $[\alpha]_D^{25} = -80.7$  ( $c$  0.73,  $\text{CHCl}_3$ );  $^1\text{H NMR}$  (400 MHz,  $\text{CDCl}_3$ )  $\delta$  1.35 (s, 6H), 1.54 (s, 3H), 2.45 (s, 3H), 2.99 (s, 1H), 3.11 (m, 2H), 3.81 (s, 1H), 3.83 (s, 2H), 6.63 (d,  $J = 8.4$ , 1H), 7.24 (t,  $J = 8.4$ , 2H), 7.50 (t,  $J = 7.2$ , 2H);  $^{13}\text{C NMR}$  (100 MHz,  $\text{CDCl}_3$ )  $\delta$  165.5 (2), 154.4, 154.1, 137.6, 137.5, 132.0, 131.8, 130.8 (2), 130.2, 130.1, 129.6, 128.8, 121.9, 121.8, 111.0, 110.7, 108.4, 108.0, 82.8, 82.6, 51.2, 51.1, 38.8, 37.6, 28.3, 28.2, 10.6, 10.5. HRMS (ESI) calcd for  $\text{C}_{19}\text{H}_{23}\text{BrN}_2\text{O}_4$   $m/z$   $[\text{M}+\text{H}]^+$ : 423.0914, found:

423.0914. Enantiomeric excess was found to be 92% by chiral HPLC (ChiralPak OD column, hexane/*i*-PrOH = 95:5, 1.0 ml/min,  $t_{\text{major}} = 6.9$  min,  $t_{\text{minor}} = 5.1$  min).

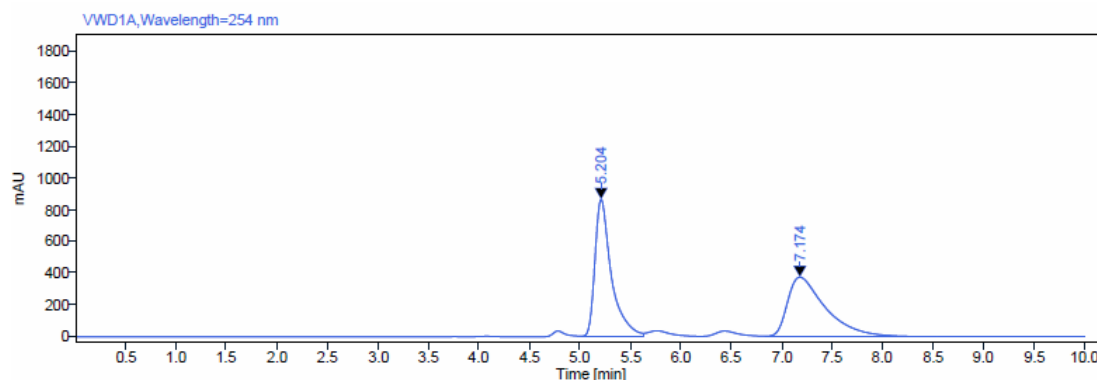

| RT [min] | Type | Width [min] | Area    | Height | Area% |
|----------|------|-------------|---------|--------|-------|
| 5.204    | VV   | 0.62        | 9836.14 | 867.35 | 50.10 |
| 7.174    | VB   | 1.70        | 9796.54 | 374.86 | 49.90 |

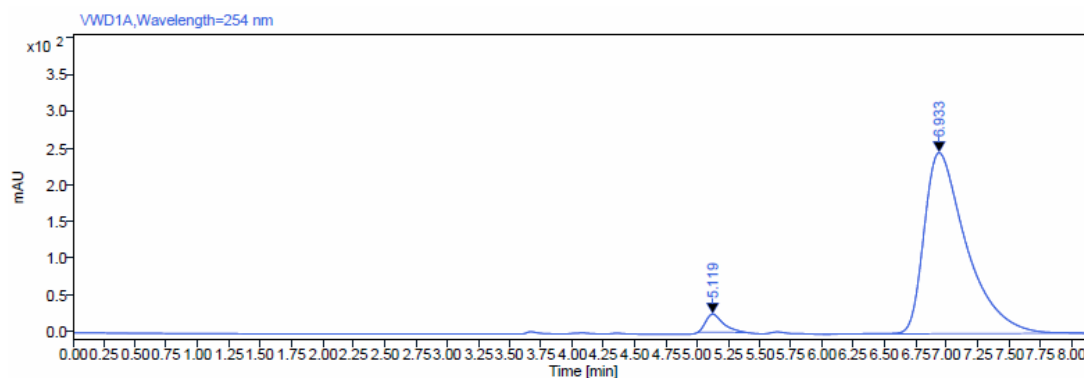

| RT [min] | Type | Width [min] | Area    | Height | Area% |
|----------|------|-------------|---------|--------|-------|
| 5.119    | MM m | 0.39        | 240.50  | 24.65  | 3.98  |
| 6.933    | BM m | 2.27        | 5805.49 | 246.15 | 96.02 |

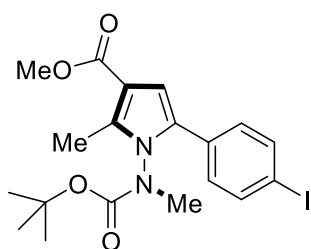

**(*R*)-methyl 1-((tert-butoxycarbonyl)(methyl)amino)-5-(4-iodophenyl)-2-methyl-1H-pyrrole-3-carboxylate (3g)**

Yellow oil.  $[\alpha]_D^{25} = -81.2$  ( $c$  0.79,  $\text{CHCl}_3$ );  $^1\text{H}$  NMR (400 MHz,  $\text{CDCl}_3$ )  $\delta$  1.35 (s, 6H), 1.54 (s, 3H), 2.44 (s, 3H), 2.90-3.19 (m, 3H), 3.78-3.91 (m, 3H), 6.63 (d,  $J=9.1$ , 1H), 7.01-7.17 (m, 2H), 7.70 (d,  $J=7.5$ , 2H);  $^{13}\text{C}$  NMR (100 MHz,  $\text{CDCl}_3$ )  $\delta$  165.5, 154.0, 138.0, 137.8, 137.6, 130.8, 130.6, 129.7, 128.9, 110.8, 108.4, 108.0, 93.2, 82.8, 82.6, 51.2, 51.1, 38.8, 37.6, 28.3, 28.2, 10.6. HRMS (ESI) calcd for  $\text{C}_{19}\text{H}_{23}\text{IN}_2\text{O}_4$   $m/z$   $[\text{M}+\text{H}]^+$ :

471.0775, found: 471.0766. Enantiomeric excess was found to be 93% by chiral HPLC (ChiralPak OD column, hexane/*i*-PrOH = 95:5, 1.0 ml/min,  $t_{\text{major}} = 7.2$  min,  $t_{\text{minor}} = 5.2$  min).

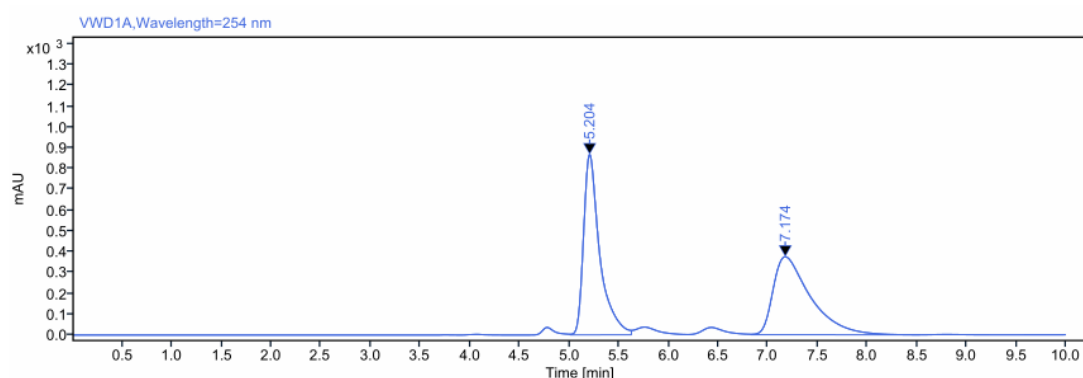

| RT [min] | Type | Width [min] | Area    | Height | Area% |
|----------|------|-------------|---------|--------|-------|
| 5.204    | VV   | 0.62        | 9836.14 | 867.35 | 50.10 |
| 7.174    | VB   | 1.70        | 9796.54 | 374.86 | 49.90 |

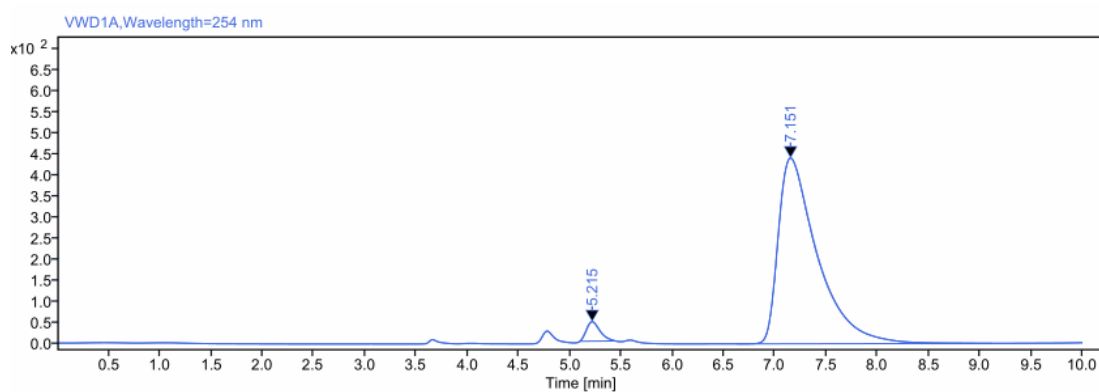

| RT [min] | Type | Width [min] | Area     | Height | Area% |
|----------|------|-------------|----------|--------|-------|
| 5.215    | MM m | 0.34        | 421.91   | 46.15  | 3.47  |
| 7.151    | BB   | 2.49        | 11734.37 | 441.76 | 96.53 |

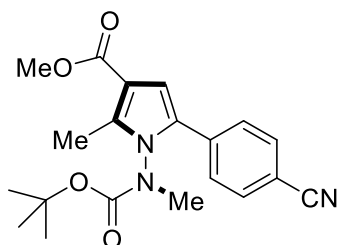

**(*R*)-methyl 1-((tert-butoxycarbonyl)(methyl)amino)-5-(4-cyanophenyl)-2-methyl-1H-pyrrole-3-carboxylate (3h)**

Yellow oil.  $[\alpha]_D^{25} = -117.1$  ( $c$  0.67,  $\text{CHCl}_3$ );  $^1\text{H}$  NMR (400 MHz,  $\text{CDCl}_3$ )  $\delta$  1.33 (s, 6H), 1.54 (s, 3H), 2.46 (d,  $J = 1.9$ , 3H), 3.10 (d,  $J = 50.5$ , 3H), 3.83 (d,  $J = 9.4$ , 3H), 6.77 (d,  $J = 15.6$ , 1H), 7.48 (t,  $J = 6.8$ , 2H), 7.65 (t,  $J = 7.0$ , 2H);  $^{13}\text{C}$  NMR (100 MHz,  $\text{CDCl}_3$ )  $\delta$  165.2, 153.9, 138.8, 135.4, 132.7, 132.6, 129.8, 127.7, 127.0, 118.8, 111.4, 110.8,

110.0, 109.8, 83.2, 82.9, 51.3, 51.3, 38.9, 37.7, 28.3, 28.1, 10.6, 10.6.. HRMS (ESI) calcd for C<sub>20</sub>H<sub>23</sub>N<sub>3</sub>O<sub>4</sub> *m/z* [M+Na]<sup>+</sup>: 392.1581, found: 392.1590. Enantiomeric excess was found to be 94% by chiral HPLC (ChiralPak OD column, hexane/*i*-PrOH = 95:5, 1.0 ml/min, *t*<sub>major</sub> = 19.8 min, *t*<sub>minor</sub> = 11.0 min).

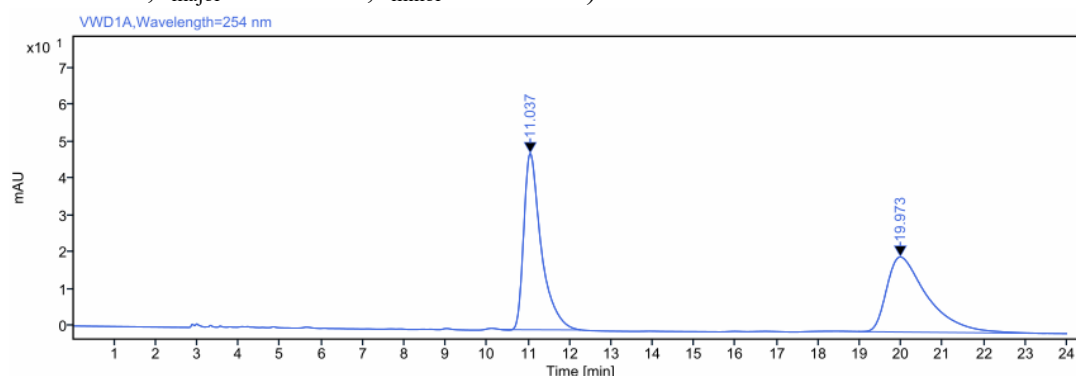

| RT [min] | Type | Width [min] | Area    | Height | Area% |
|----------|------|-------------|---------|--------|-------|
| 11.037   | MM m | 1.91        | 1399.22 | 47.88  | 50.19 |
| 19.973   | MM m | 4.53        | 1388.62 | 20.38  | 49.81 |

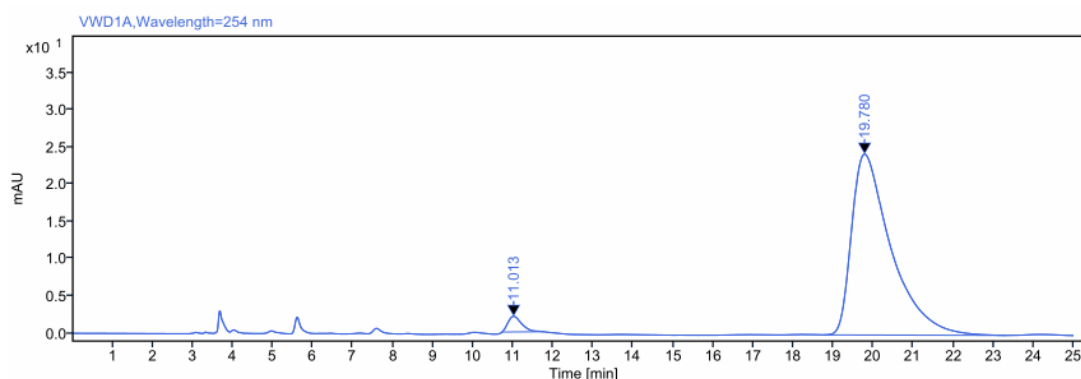

| RT [min] | Type | Width [min] | Area    | Height | Area% |
|----------|------|-------------|---------|--------|-------|
| 11.013   | MM m | 1.03        | 49.92   | 2.10   | 2.91  |
| 19.780   | BB   | 4.54        | 1665.90 | 24.31  | 97.09 |

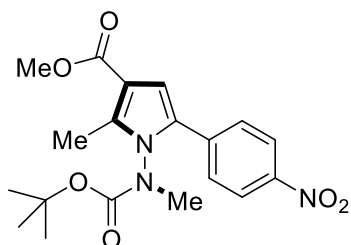

**(*R*)-methyl 1-((tert-butoxycarbonyl)(methyl)amino)-2-methyl-5-(4-nitrophenyl)-1H-pyrrole-3-carboxylate (3i)**

Brown solid.  $[\alpha]_D^{25} = -43.5$  (*c* 0.7, CHCl<sub>3</sub>); <sup>1</sup>H NMR (400 MHz, CDCl<sub>3</sub>) δ 1.34 (s, 6H), 1.56 (s, 3H), 2.47 (s, 3H), 3.12 (d, *J* = 48.2, 3H), 3.84 (d, *J* = 9.2, 3H), 6.84 (d, *J* = 14.4, 1H), 7.53 (d, *J* = 7.8, 2H), 8.23 (t, *J* = 7.7, 2H); <sup>13</sup>C NMR (100 MHz, CDCl<sub>3</sub>) δ 165.1, 153.8, 146.6, 139.2, 137.3, 129.5, 127.6, 126.9, 124.4, 124.2, 111.6, 110.6, 110.4, 83.3,

83.0, 51.4, 51.3, 38.9, 37.7, 28.3, 28.1, 10.6, 10.6. HRMS (ESI) calcd for C<sub>19</sub>H<sub>24</sub>N<sub>3</sub>O<sub>6</sub>  $m/z$  [M+H]<sup>+</sup>: 390.1660, found: 390.1664. Enantiomeric excess was found to be 92% by chiral HPLC (ChiralPak OD column, hexane/*i*-PrOH = 80:20, 1.0 ml/min,  $t_{\text{major}}$  = 10.2 min,  $t_{\text{minor}}$  = 6.0 min).

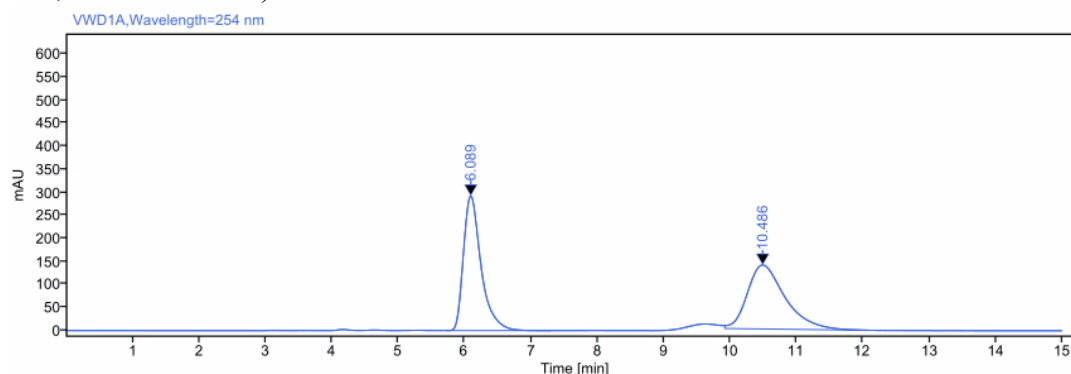

| RT [min] | Type | Width [min] | Area    | Height | Area% |
|----------|------|-------------|---------|--------|-------|
| 6.089    | BM m | 1.57        | 5393.36 | 292.19 | 49.60 |
| 10.486   | MM m | 2.36        | 5479.61 | 138.78 | 50.40 |

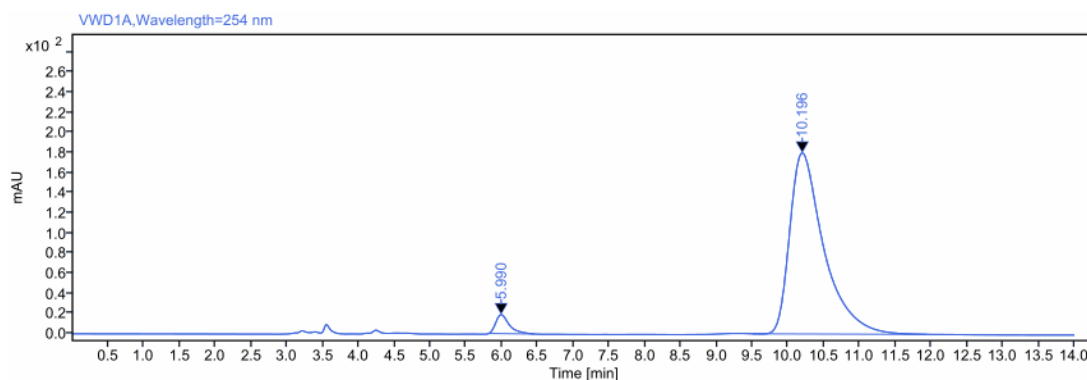

| RT [min] | Type | Width [min] | Area    | Height | Area% |
|----------|------|-------------|---------|--------|-------|
| 5.990    | MM m | 0.64        | 246.56  | 18.81  | 3.96  |
| 10.196   | MM m | 2.44        | 5976.39 | 180.18 | 96.04 |

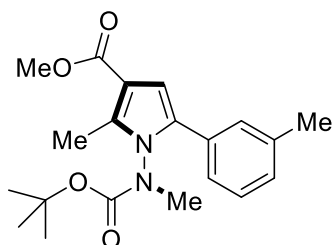

**(*R*)-methyl 1-((tert-butoxycarbonyl)(methyl)amino)-2-methyl-5-(*m*-tolyl)-1H-pyrrole-3-carboxylate (3j)**

Yellow oil.  $[\alpha]_D^{25} = -54.2$  (*c* 0.25, CHCl<sub>3</sub>); <sup>1</sup>H NMR (400 MHz, CDCl<sub>3</sub>)  $\delta$  1.37 (s, 6H), 1.54 (s, 3H), 2.40 (d, *J* = 39.1, 6H), 3.03 (d, *J* = 44.8, 3H), 3.82 (d, *J* = 8.9, 3H), 6.60 (d, *J* = 4.8, 1H), 7.08-7.27 (m, 4H); <sup>13</sup>C NMR (100 MHz, CDCl<sub>3</sub>)  $\delta$  165.7, 154.2, 138.3, 137.1, 132.1, 131.1, 128.8, 128.7, 128.5, 128.3, 125.1, 124.6, 110.4, 107.9, 107.5, 82.3,

51.1, 51.1, 38.7, 37.5, 28.3, 28.2, 21.6, 10.5, 10.5. HRMS (ESI) calcd for C<sub>20</sub>H<sub>26</sub>N<sub>2</sub>O<sub>4</sub> *m/z* [M+H]<sup>+</sup>: 359.1965, found: 359.1963. Enantiomeric excess was found to be 91% by chiral HPLC (ChiralPak OD column, hexane/*i*-PrOH = 99:1, 1.0 ml/min, *t*<sub>major</sub> = 16.1 min, *t*<sub>minor</sub> = 13.1 min).

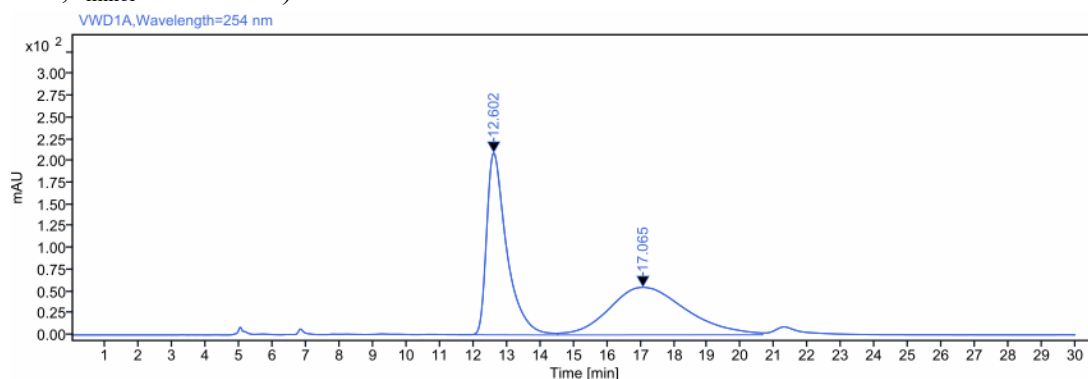

| RT [min] | Type | Width [min] | Area    | Height | Area% |
|----------|------|-------------|---------|--------|-------|
| 12.602   | MM m | 2.99        | 8699.99 | 209.03 | 49.84 |
| 17.065   | MM m | 6.14        | 8755.66 | 54.65  | 50.16 |

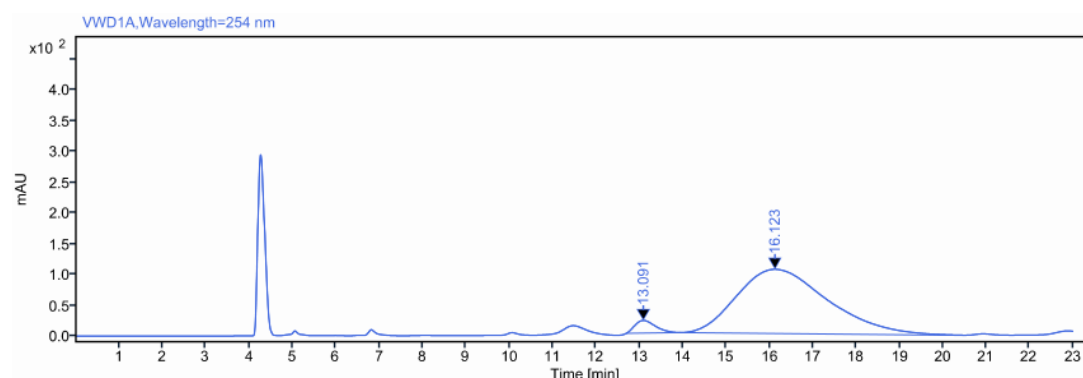

| RT [min] | Type | Width [min] | Area     | Height | Area% |
|----------|------|-------------|----------|--------|-------|
| 13.091   | MB m | 1.25        | 679.15   | 20.61  | 4.29  |
| 16.123   | MB m | 6.51        | 15168.50 | 104.29 | 95.71 |

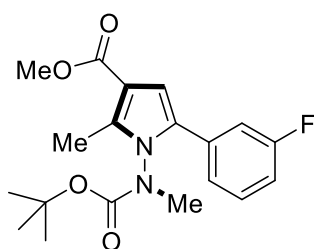

**(*R*)-methyl 1-((tert-butoxycarbonyl)(methyl)amino)-5-(3-fluorophenyl)-2-methyl-1H-pyrrole-3-carboxylate (3k)**

Colorless oil.  $[\alpha]_D^{25} = -76.6$  (*c* 0.62, CHCl<sub>3</sub>); <sup>1</sup>H NMR (400 MHz, CDCl<sub>3</sub>) δ 1.36 (s, 6H), 1.54 (s, 3H), 2.45 (s, 3H), 3.07 (d, *J* = 47.7, 3H), 3.72-4.04 (m, 3H), 6.66 (d, *J* = 2.2, 1H), 6.93-7.22 (m, 3H), 7.34 (q, *J* = 7.2, 1H); <sup>13</sup>C NMR (100 MHz, CDCl<sub>3</sub>) δ 165.5, 161.8, 154.0, 137.6, 133.2, 130.7, 130.4, 130.3, 130.2, 130.1, 123.7, 123.6, 122.9, 122.9, 114.7, 114.7, 114.6, 114.5, 114.5, 114.4, 114.2, 111.0, 110.8, 108.7, 108.3, 82.9, 82.6,

51.2, 51.2, 38.7, 37.6, 28.3, 28.1, 10.5, 10.5. HRMS (ESI) calcd for C<sub>19</sub>H<sub>23</sub>FN<sub>2</sub>O<sub>4</sub> *m/z* [M+H]<sup>+</sup>: 363.1715, found: 359.1724. Enantiomeric excess was found to be 92% by chiral HPLC (ChiralPak OD column, hexane/*i*-PrOH = 95:5, 1.0 ml/min, *t*<sub>major</sub> = 6.2 min, *t*<sub>minor</sub> = 5.7 min).

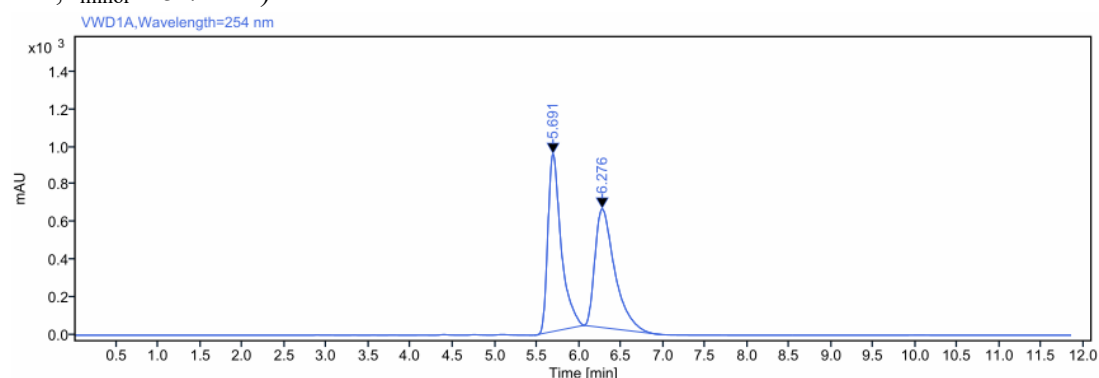

| RT [min] | Type | Width [min] | Area     | Height | Area% |
|----------|------|-------------|----------|--------|-------|
| 5.691    | MM m | 0.59        | 10351.73 | 941.10 | 50.03 |
| 6.276    | MM m | 0.93        | 10340.43 | 629.87 | 49.97 |

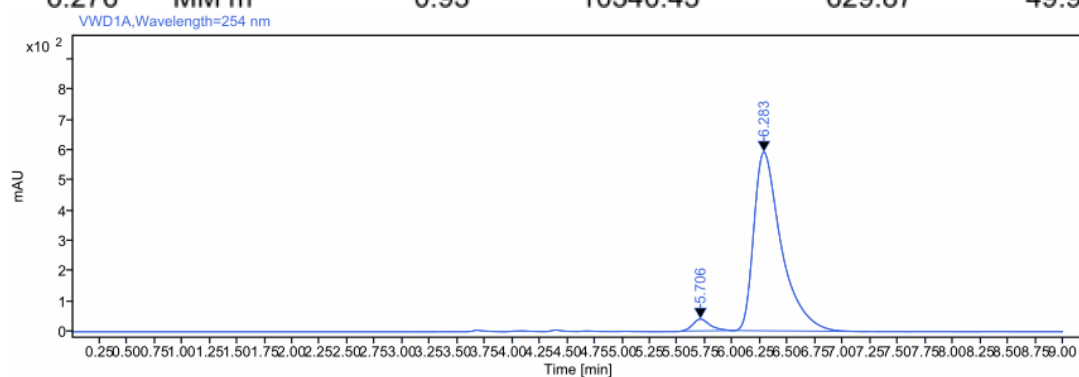

| RT [min] | Type | Width [min] | Area     | Height | Area% |
|----------|------|-------------|----------|--------|-------|
| 5.706    | MM m | 0.47        | 425.50   | 39.09  | 3.98  |
| 6.283    | MM m | 1.24        | 10254.35 | 589.90 | 96.02 |

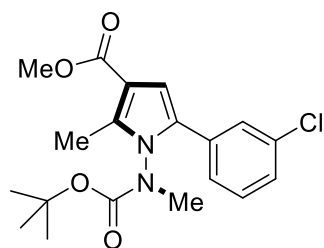

**(*R*)-methyl 1-((*tert*-butoxycarbonyl)(methyl)amino)-5-(3-chlorophenyl)-2-methyl-1H-pyrrole-3-carboxylate (3l)**

Colorless oil.  $[\alpha]_D^{25} = -71.9$  (*c* 0.23, CHCl<sub>3</sub>); <sup>1</sup>H NMR (400 MHz, CDCl<sub>3</sub>) δ 1.35 (s, 6H), 1.53 (s, 3H), 2.43 (s, 3H), 3.03 (d, *J* = 40.2, 3H), 3.80 (d, *J* = 9.0, 3H), 6.62 (d, *J* = 2.0, 1H), 7.18-7.30 (m, 3H), 7.35 (d, *J* = 3.0, 1H); <sup>13</sup>C NMR (100 MHz, CDCl<sub>3</sub>) δ 165.5, 154.0, 137.6, 134.7, 132.9, 130.6, 130.1, 129.9, 127.7, 127.6, 126.1, 125.4, 110.8, 108.8, 108.4, 82.9, 82.7, 51.2, 51.1, 38.8, 37.6, 28.3, 28.2, 10.5, 10.5. HRMS (ESI) calcd for C<sub>19</sub>H<sub>23</sub>ClN<sub>2</sub>O<sub>4</sub> *m/z* [M+H]<sup>+</sup>: 379.1419, found: 379.1414. Enantiomeric excess was

found to be 94% by chiral HPLC (ChiralPak OD column, hexane/*i*-PrOH = 99:1, 1.0 ml/min,  $t_{\text{major}} = 13.5$  min,  $t_{\text{minor}} = 11.5$  min).

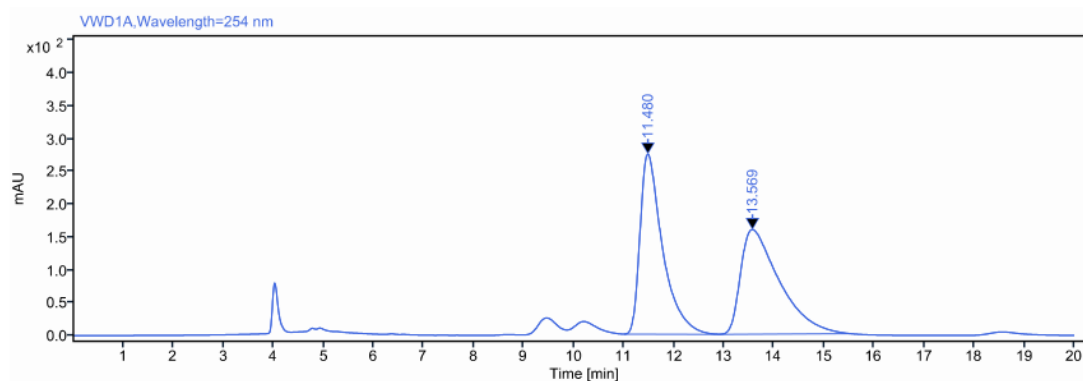

|        |      |      |         |        |       |
|--------|------|------|---------|--------|-------|
| 11.480 | MM m | 1.89 | 8590.62 | 274.38 | 49.99 |
| 13.569 | MM m | 2.63 | 8595.10 | 159.29 | 50.01 |

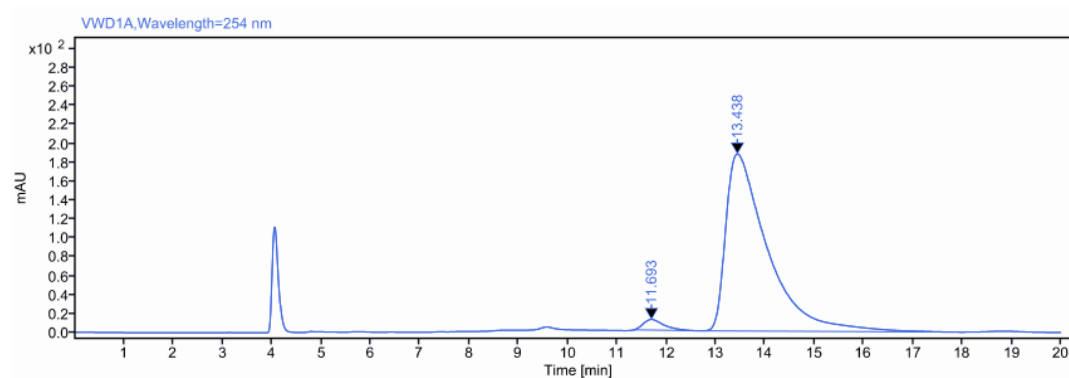

| RT [min] | Type | Width [min] | Area     | Height | Area% |
|----------|------|-------------|----------|--------|-------|
| 11.693   | MM m | 1.37        | 330.79   | 11.27  | 2.91  |
| 13.438   | BB   | 5.19        | 11050.30 | 187.45 | 97.09 |

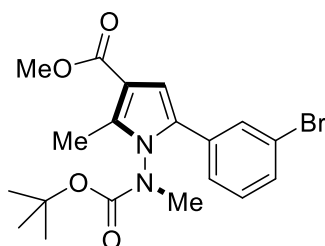

**(R)-methyl 5-(3-bromophenyl)-1-((tert-butoxycarbonyl)(methyl)amino)-2-methyl-1H-pyrrole-3-carboxylate (3m)**

Yellow oil.  $[\alpha]_D^{25} = -58.9$  (*c* 0.92, CHCl<sub>3</sub>); <sup>1</sup>H NMR (400 MHz, CDCl<sub>3</sub>) δ 1.38 (s, 6H), 2.45 (s, 3H), 3.05 (d, *J* = 37.9, 3H), 3.82 (d, *J* = 8.8, 3H), 6.64 (s, 1H), 7.22-7.33 (m, 2H), 7.44 (d, *J* = 7.8, 1H), 7.53 (s, 1H); <sup>13</sup>C NMR (100 MHz, CDCl<sub>3</sub>) δ 165.5, 154.0, 137.6, 133.1, 130.6, 130.6, 130.5, 130.4, 130.3, 130.2, 126.6, 125.8, 122.8, 110.8, 108.8, 108.4, 82.9, 82.7, 51.2, 51.1, 38.8, 37.6, 28.3, 28.2, 10.5, 10.5. HRMS (ESI) calcd for C<sub>19</sub>H<sub>23</sub>BrN<sub>2</sub>O<sub>4</sub> *m/z* [M+H]<sup>+</sup>: 423.0914, found: 423.0921. Enantiomeric excess was



found to be 95% by chiral HPLC (ChiralPak OD column, hexane/*i*-PrOH = 98:2, 1.0 ml/min,  $t_{\text{major}} = 7.3$  min,  $t_{\text{minor}} = 6.6$  min).

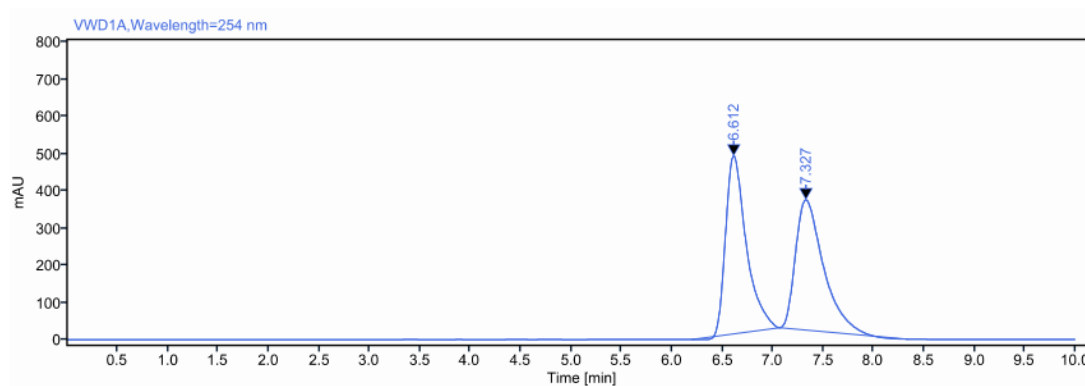

| RT [min] | Type | Width [min] | Area    | Height | Area% |
|----------|------|-------------|---------|--------|-------|
| 6.612    | BM m | 0.87        | 6818.73 | 478.49 | 50.19 |
| 7.327    | MM m | 1.28        | 6765.85 | 350.08 | 49.81 |

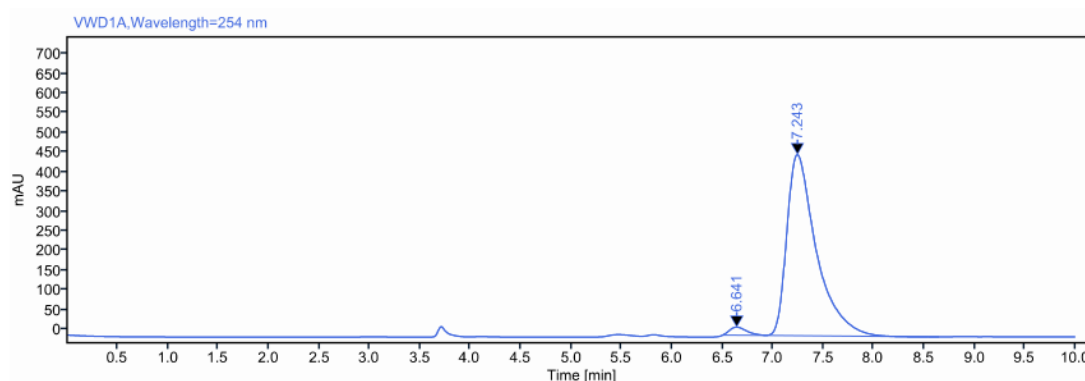

| RT [min] | Type | Width [min] | Area    | Height | Area% |
|----------|------|-------------|---------|--------|-------|
| 6.641    | MM m | 0.41        | 235.55  | 20.41  | 2.46  |
| 7.243    | MB m | 1.73        | 9339.57 | 459.28 | 97.54 |

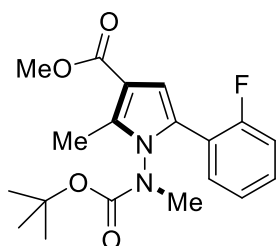

**(*R*)-methyl 1-((tert-butoxycarbonyl)(methyl)amino)-5-(2-fluorophenyl)-2-methyl-1H-pyrrole-3-carboxylate (3n)**

Colorless oil.  $[\alpha]_D^{25} = -34.5$  (*c* 0.35,  $\text{CHCl}_3$ );  $^1\text{H}$  NMR (400 MHz,  $\text{CDCl}_3$ )  $\delta$  1.39 (d,  $J = 56.7$ , 9H), 2.46 (s, 3H), 3.09 (d,  $J = 43.0$ , 3H), 3.82 (d,  $J = 9.4$ , 3H), 6.65 (d,  $J = 13.1$ , 1H), 7.13 (q,  $J = 8.7$ , 9.4, 2H), 7.25 (d,  $J = 7.5$ , 1H), 7.29-7.33 (m, 1H);  $^{13}\text{C}$  NMR (100 MHz,  $\text{CDCl}_3$ )  $\delta$  165.6, 161.6, 159.1, 154.1, 137.3, 131.8, 131.5, 131.5, 130.2, 130.1, 129.9, 125.7, 124.2, 124.1, 124.1, 119.2, 116.2, 116.0, 115.7, 110.6, 110.3, 109.8, 109.8, 82.5, 82.2, 51.1, 51.1, 38.8, 37.7, 37.7, 28.2, 28.1, 10.7, 10.6.. HRMS (ESI) calcd for

C<sub>19</sub>H<sub>23</sub>N<sub>2</sub>O<sub>4</sub>  $m/z$  [M+H]<sup>+</sup>: 363.1715, found: 363.1707. Enantiomeric excess was found to be 92% by chiral HPLC (ChiralPak OD column, hexane/*i*-PrOH = 99:1, 1.0 ml/min,  $t_{\text{major}}$  = 19.8 min,  $t_{\text{minor}}$  = 18.6 min).

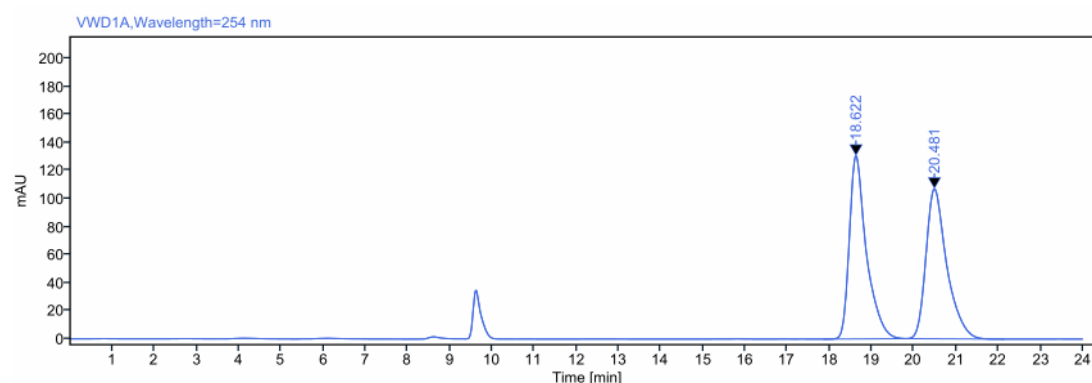

| RT [min] | Type | Width [min] | Area    | Height | Area% |
|----------|------|-------------|---------|--------|-------|
| 18.622   | BB   | 1.96        | 3674.34 | 130.71 | 50.03 |
| 20.481   | BB   | 2.32        | 3670.33 | 107.05 | 49.97 |

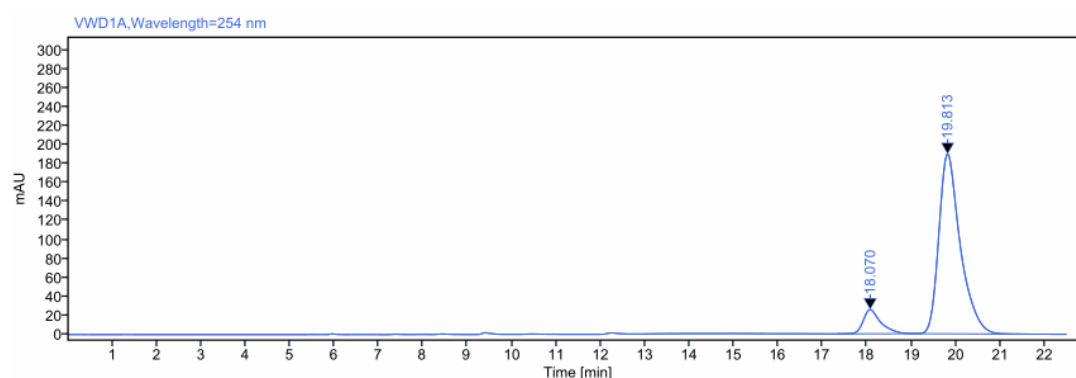

| RT [min] | Type | Width [min] | Area    | Height | Area% |
|----------|------|-------------|---------|--------|-------|
| 18.070   | BB   | 1.80        | 699.35  | 25.48  | 9.91  |
| 19.813   | BB   | 2.69        | 6361.20 | 189.42 | 90.09 |

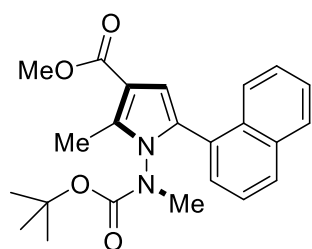

**(*R*)-methyl 1-((tert-butoxycarbonyl)(methyl)amino)-2-methyl-5-(naphthalen-1-yl)-1H-pyrrole-3-carboxylate (30)**

Colorless oil.  $[\alpha]_D^{25} = -50.1$  ( $c$  0.50, CHCl<sub>3</sub>); <sup>1</sup>H NMR (400 MHz, CDCl<sub>3</sub>)  $\delta$  1.38 (d,  $J$  = 18.3, 9H), 2.50 (s, 3H), 2.86 (d,  $J$  = 59.1, 3H), 3.85 (d,  $J$  = 9.6, 3H), 6.65 (dd,  $J$  = 2.8, 13.2, 1H), 7.38-7.67 (m, 4H), 7.78-8.05 (m, 3H); <sup>13</sup>C NMR (100 MHz, CDCl<sub>3</sub>)  $\delta$  154.0, 133.8, 133.2, 129.6, 129.2, 129.0, 128.9, 128.7, 128.3, 128.2, 126.5, 126.4, 126.1, 126.1, 125.1, 125.0, 110.2, 109.9, 82.3, 51.2, 51.1, 38.9, 38.0, 28.2, 28.1, 10.8, 10.7. HRMS

(ESI) calcd for C<sub>23</sub>H<sub>26</sub>N<sub>2</sub>O<sub>4</sub>  $m/z$  [M+H]<sup>+</sup>: 395.1965, found: 395.1958. Enantiomeric excess was found to be 90% by chiral HPLC (ChiralPak OD column, hexane/*i*-PrOH = 99:1, 1.0 ml/min,  $t_{\text{major}}$  = 13.8 min,  $t_{\text{minor}}$  = 12.3 min).

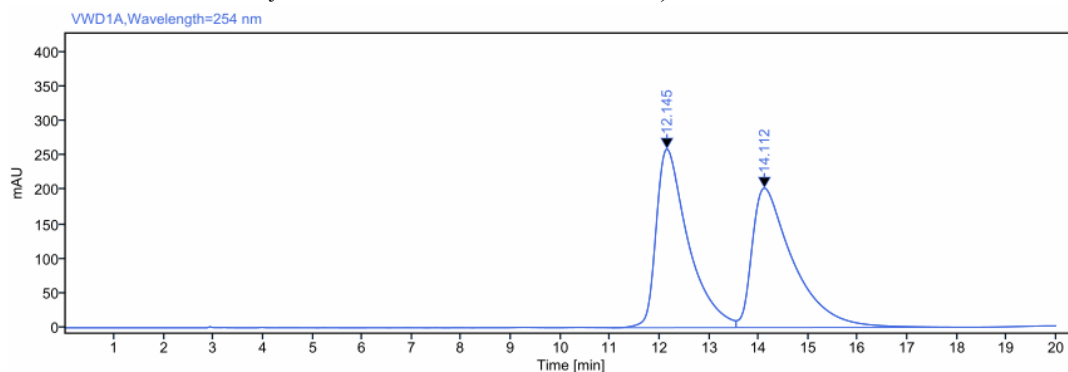

| RT [min] | Type | Width [min] | Area     | Height | Area% |
|----------|------|-------------|----------|--------|-------|
| 12.145   | BV   | 2.50        | 11630.71 | 258.86 | 49.91 |
| 14.112   | VB   | 4.64        | 11672.52 | 202.09 | 50.09 |

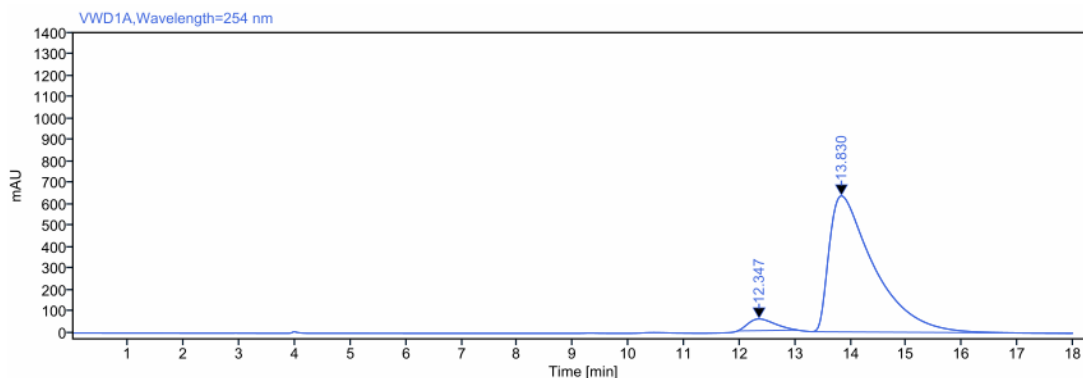

| RT [min] | Type | Width [min] | Area     | Height | Area% |
|----------|------|-------------|----------|--------|-------|
| 12.347   | MM m | 1.07        | 1799.98  | 54.13  | 4.82  |
| 13.830   | MB m | 4.69        | 35569.11 | 634.50 | 95.18 |

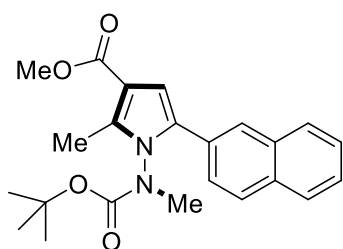

**(*R*)-methyl 1-((tert-butoxycarbonyl)(methyl)amino)-2-methyl-5-(naphthalen-2-yl)-1H-pyrrole-3-carboxylate (3p)**

Colorless oil.  $[\alpha]_D^{25} = -73.6$  ( $c$  0.70, CHCl<sub>3</sub>); <sup>1</sup>H NMR (400 MHz, CDCl<sub>3</sub>)  $\delta$  1.49 (d,  $J$  = 67.9, 9H), 2.50 (s, 3H), 3.05 (d,  $J$  = 54.6, 3H), 3.85 (d,  $J$  = 9.4, 3H), 6.75 (d,  $J$  = 10.8, 1H), 7.41-7.63 (m, 3H), 7.69-8.01 (m, 4H); <sup>13</sup>C NMR (100 MHz, CDCl<sub>3</sub>)  $\delta$  165.7, 154.3, 137.5, 133.5, 132.7, 131.8, 128.5, 128.4, 128.2, 128.2, 127.8, 127.8, 126.6, 126.5, 126.3, 126.3, 126.2, 125.8, 125.6, 110.7, 108.6, 108.2, 82.6, 82.5, 51.2, 51.1, 38.7, 37.5, 28.4,

28.2, 10.6, 10.5. HRMS (ESI) calcd for C<sub>23</sub>H<sub>26</sub>N<sub>2</sub>O<sub>4</sub> *m/z* [M+H]<sup>+</sup>: 395.1965, found: 395.1961. Enantiomeric excess was found to be 90% by chiral HPLC (ChiralPak OD column, hexane/*i*-PrOH = 95:5, 1.0 ml/min, *t*<sub>major</sub> = 7.6min, *t*<sub>minor</sub> = 6.0 min).

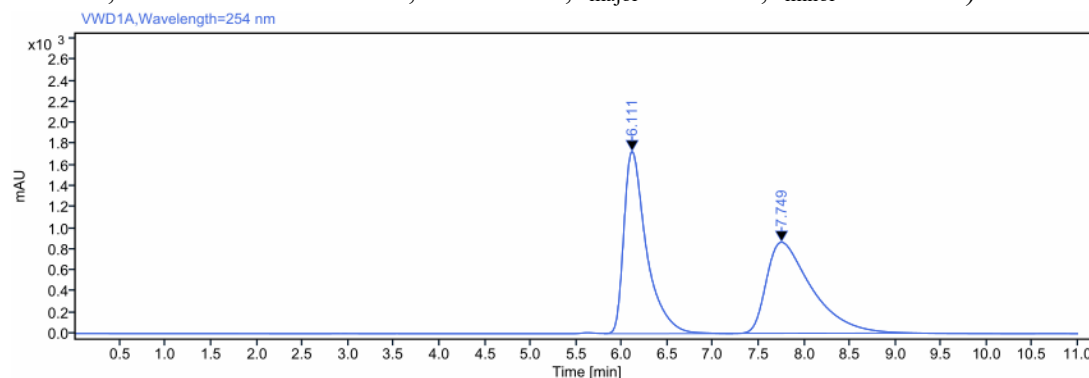

| RT [min] | Type | Width [min] | Area     | Height  | Area% |
|----------|------|-------------|----------|---------|-------|
| 6.111    | VM m | 1.41        | 29766.50 | 1730.03 | 49.97 |
| 7.749    | MM m | 1.88        | 29796.50 | 865.08  | 50.03 |

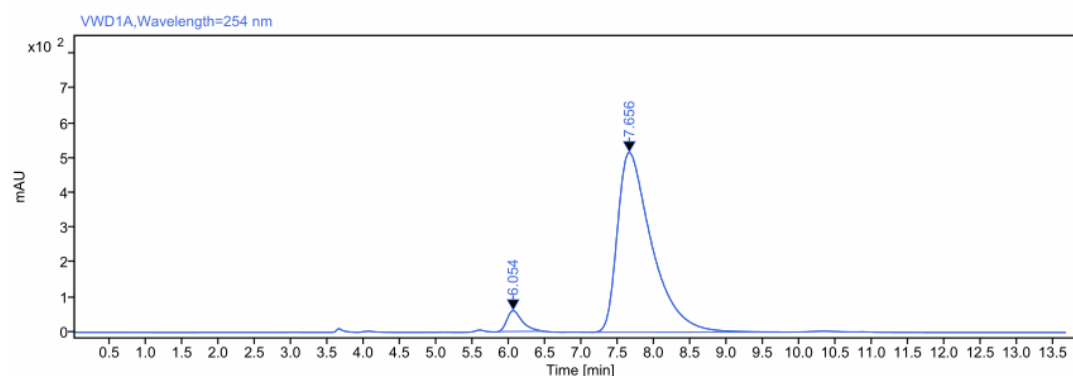

| RT [min] | Type | Width [min] | Area     | Height | Area% |
|----------|------|-------------|----------|--------|-------|
| 6.054    | MM m | 0.63        | 875.73   | 59.85  | 4.89  |
| 7.656    | BB   | 2.79        | 17036.83 | 516.94 | 95.11 |

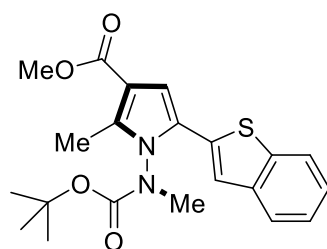

**(*R*)-methyl 5-(benzo[*b*]thiophen-2-yl)-1-((tert-butoxycarbonyl)(methyl)amino)-2-methyl-1H-pyrrole-3-carboxylate (3q)**

Brown oil.  $[\alpha]_D^{25} = -101.1$  (*c* 0.72, CHCl<sub>3</sub>); <sup>1</sup>H NMR (400 MHz, CDCl<sub>3</sub>) δ 1.33 (s, 7H), 1.57 (s, 2H), 2.46 (s, 3H), 3.26 (d, *J* = 23.3, 3H), 3.83 (d, *J* = 10.0, 3H), 6.87 (s, 1H), 7.22-7.38 (m, 3H), 7.75 (dd, *J* = 7.6, 24.0, 2H); <sup>13</sup>C NMR (100 MHz, CDCl<sub>3</sub>) δ 165.3, 154.1, 140.0, 139.0, 137.9, 132.2, 125.7, 124.7, 124.6, 124.5, 124.4, 123.5, 123.4, 122.1, 122.1, 120.1, 119.3, 111.0, 109.2, 108.5, 82.8, 51.3, 38.9, 37.4, 28.4, 28.1, 10.5, 10.5.

HRMS (ESI) calcd for C<sub>21</sub>H<sub>24</sub>N<sub>2</sub>O<sub>4</sub>S *m/z* [M+H]<sup>+</sup>: 401.1530, found: 401.1522. Enantiomeric excess was found to be 90% by chiral HPLC (ChiralPak OD column, hexane/*i*-PrOH = 95:5, 1.0 ml/min, *t*<sub>major</sub> = 8.2 min, *t*<sub>minor</sub> = 6.2 min).

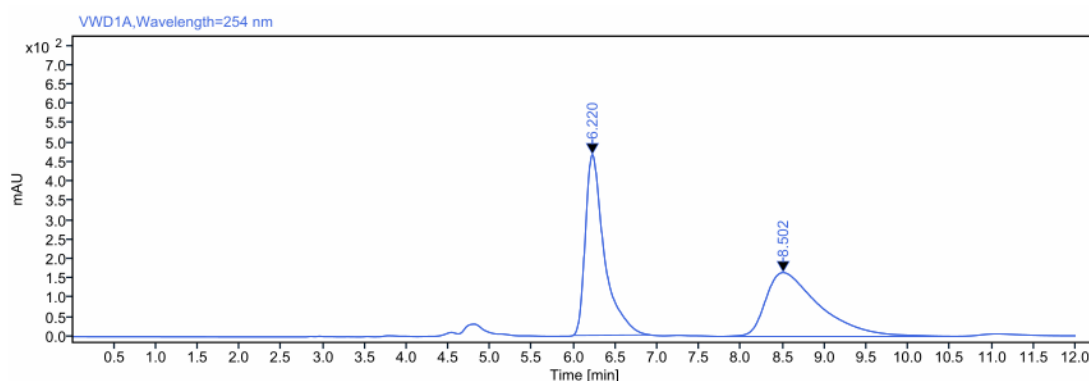

| RT [min] | Type | Width [min] | Area    | Height | Area% |
|----------|------|-------------|---------|--------|-------|
| 6.220    | MM m | 0.92        | 7382.68 | 466.32 | 50.17 |
| 8.502    | BB   | 2.80        | 7332.30 | 164.96 | 49.83 |

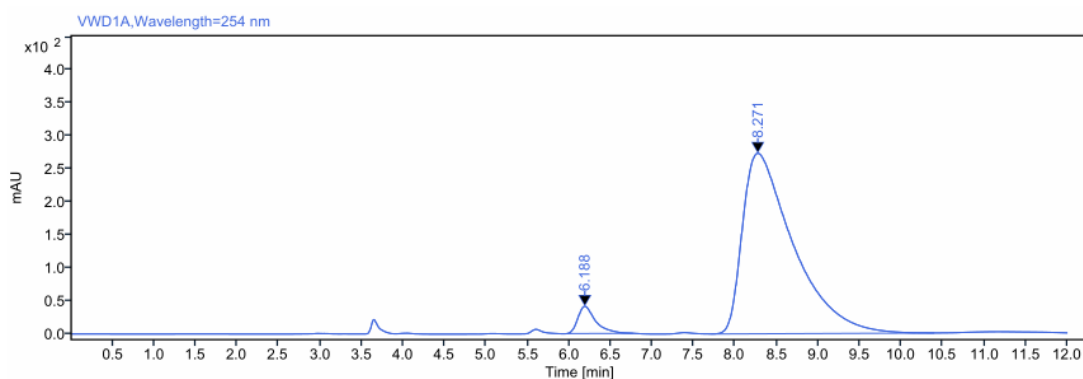

| RT [min] | Type | Width [min] | Area     | Height | Area% |
|----------|------|-------------|----------|--------|-------|
| 6.188    | MM m | 0.79        | 611.47   | 41.21  | 4.98  |
| 8.271    | BB   | 2.69        | 11668.04 | 273.97 | 95.02 |

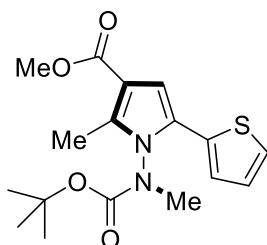

**(*R*)-methyl 1-((tert-butoxycarbonyl)(methyl)amino)-2-methyl-5-(thiophen-2-yl)-1H-pyrrole-3-carboxylate (3r)**

Ink green oil  $[\alpha]_D^{25} = -57.8$  (*c* 0.56, CHCl<sub>3</sub>); <sup>1</sup>H NMR (400 MHz, CDCl<sub>3</sub>) δ 1.33 (s, 7H), 1.57 (s, 2H), 2.46 (s, 3H), 3.26 (d, *J* = 23.3, 3H), 3.83 (d, *J* = 10.0, 3H), 6.87 (s, 1H), 7.22-7.38 (m, 3H), 7.75 (dd, *J* = 7.6, 24.0, 2H); <sup>13</sup>C NMR (100 MHz, CDCl<sub>3</sub>) δ 165.3, 154.1, 140.0, 139.0, 137.9, 132.2, 125.7, 124.7, 124.6, 124.5, 124.4, 123.5, 123.4, 122.1,

122.1, 120.1, 119.3, 111.0, 109.2, 108.5, 82.8, 51.3, 38.9, 37.4, 28.4, 28.1, 10.5, 10.5.  
 HRMS (ESI) calcd for C<sub>17</sub>H<sub>22</sub>N<sub>2</sub>O<sub>4</sub>S *m/z* [M+H]<sup>+</sup>: 351.1373, found: 351.1375.  
 Enantiomeric excess was found to be 93% by chiral HPLC (ChiralPak OD column,  
 hexane/*i*-PrOH = 99:1, 1.0 ml/min, *t*<sub>major</sub> = 22.2 min, *t*<sub>minor</sub> = 17.2 min).

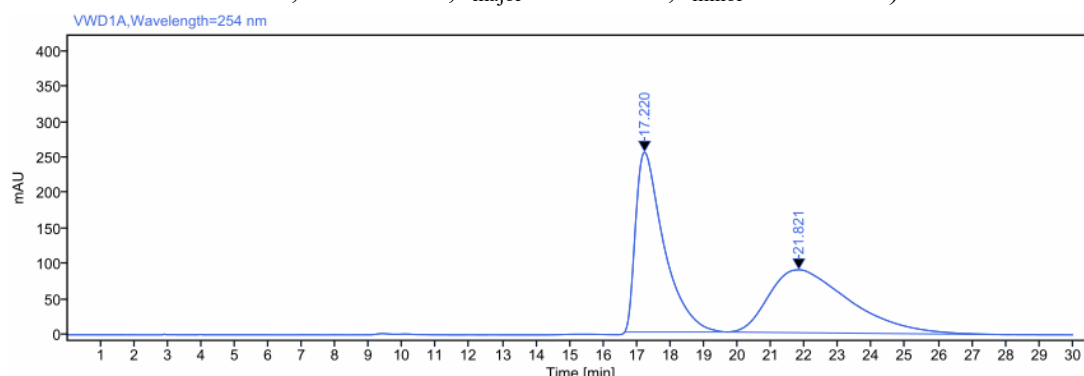

| RT [min] | Type | Width [min] | Area     | Height | Area% |
|----------|------|-------------|----------|--------|-------|
| 17.220   | MM m | 3.07        | 14856.99 | 253.75 | 50.14 |
| 21.821   | MM m | 8.40        | 14773.75 | 88.64  | 49.86 |

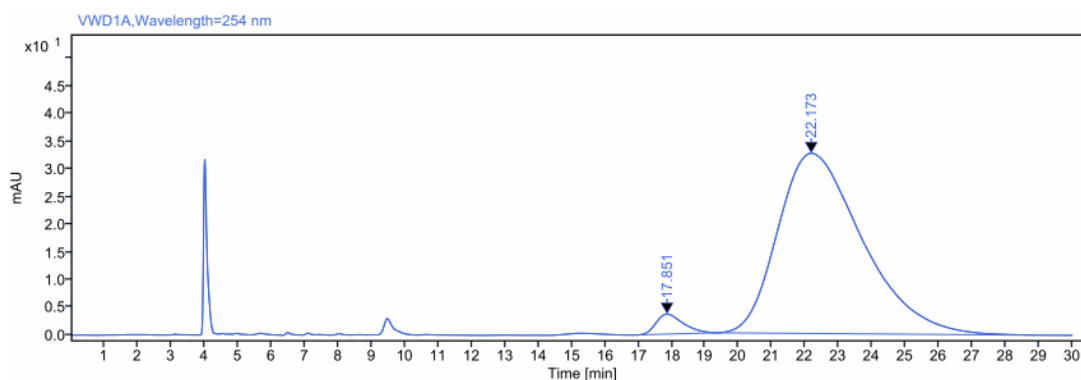

| RT [min] | Type | Width [min] | Area    | Height | Area% |
|----------|------|-------------|---------|--------|-------|
| 17.851   | MM m | 2.31        | 203.13  | 3.62   | 3.43  |
| 22.173   | BB   | 9.52        | 5727.12 | 32.54  | 96.57 |

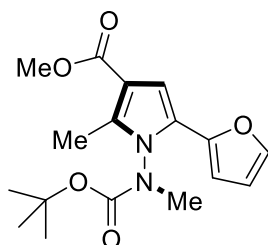

**(*R*)-methyl 1-((tert-butoxycarbonyl)(methyl)amino)-5-(furan-2-yl)-2-methyl-1H-pyrrole-3-carboxylate (3s)**

Yellow oil.  $[\alpha]_D^{25} = -25.5$  (*c* 0.17, CHCl<sub>3</sub>); <sup>1</sup>H NMR (400 MHz, CDCl<sub>3</sub>) δ 1.29 (s, 7H), 1.54 (s, 2H), 2.45 (s, 3H), 3.26 (s, 3H), 3.82 (d, *J* = 9.4, 3H), 6.36 (dd, *J* = 3.4, 51.9, 2H), 6.78 (d, *J* = 11.7, 1H), 7.39 (d, *J* = 6.8, 1H); <sup>13</sup>C NMR (100 MHz, CDCl<sub>3</sub>) 165.5, 154.3, 145.6, 141.6, 141.5, 137.4, 123.0, 111.4, 111.3, 110.5, 107.2, 106.7, 105.2, 105.1,

82.2, 51.2, 51.1, 38.6, 37.1, 28.3, 28.0, 10.3. HRMS (ESI) calcd for C<sub>17</sub>H<sub>22</sub>N<sub>2</sub>O<sub>5</sub> *m/z* [M+H]<sup>+</sup>: 335.1601, found: 335.1595. Enantiomeric excess was found to be 90% by chiral HPLC (ChiralPak OD column, hexane/*i*-PrOH = 99:1, 1.0 ml/min, *t*<sub>major</sub> = 16.0 min, *t*<sub>minor</sub> = 11.3 min).

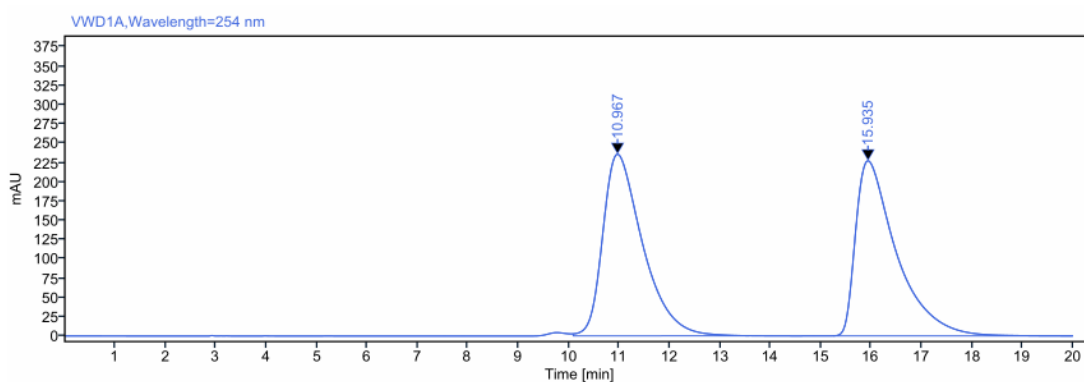

| RT [min] | Type | Width [min] | Area     | Height | Area% |
|----------|------|-------------|----------|--------|-------|
| 10.967   | MM m | 3.49        | 12968.50 | 235.83 | 50.36 |
| 15.935   | MB m | 4.76        | 12780.80 | 227.25 | 49.64 |

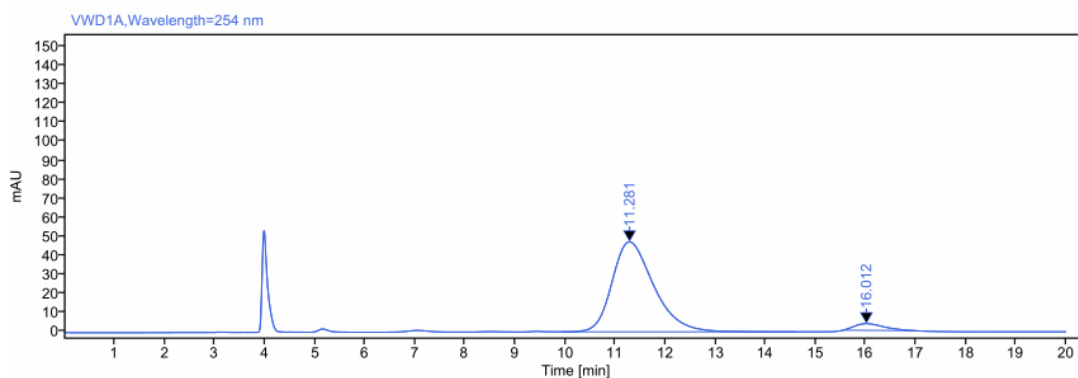

| RT [min] | Type | Width [min] | Area    | Height | Area% |
|----------|------|-------------|---------|--------|-------|
| 11.281   | BM m | 4.67        | 2738.23 | 47.35  | 95.02 |
| 16.012   | MM m | 1.42        | 143.64  | 3.50   | 4.98  |

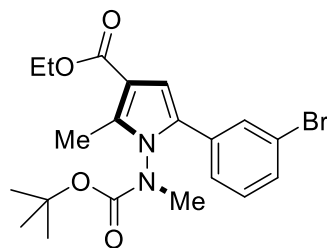

**(*R*)-ethyl 5-(3-bromophenyl)-1-((tert-butoxycarbonyl)(methyl)amino)-2-methyl-1H-pyrrole-3-carboxylate (3t)**

Colorless oil.  $[\alpha]_D^{25} = -58.5$  (*c* 0.77, CHCl<sub>3</sub>); <sup>1</sup>H NMR (400 MHz, CDCl<sub>3</sub>) δ 1.47 (d, *J* = 68.1, 12H), 2.45 (s, 3H), 3.05 (d, *J* = 35.8, 3H), 4.26-4.29 (m, 2H), 6.66 (s, 1H), 7.23 (*m*, 1H), 7.27-7.35 (m, 1H), 7.44 (d, *J* = 7.9, 1H), 7.54 (s, 1H).; <sup>13</sup>C NMR (100 MHz,

CDCl<sub>3</sub>) δ 154.1, 137.5, 133.2, 130.6, 130.5, 130.4, 130.3, 130.2, 126.6, 125.8, 122.8, 111.1, 108.9, 108.5, 82.9, 82.7, 59.9, 59.8, 38.8, 37.6, 28.4, 28.2, 14.6, 14.6, 10.5, 10.5. HRMS (ESI) calcd for C<sub>20</sub>H<sub>25</sub>BrN<sub>2</sub>O<sub>4</sub> *m/z* [M+H]<sup>+</sup>: 437.1070, found: 437.1060. Enantiomeric excess was found to be 96% by chiral HPLC (ChiralPak OD column, hexane/*i*-PrOH = 95:5, 1.0 ml/min, *t*<sub>major</sub> = 6.2 min, *t*<sub>minor</sub> = 5.4 min).

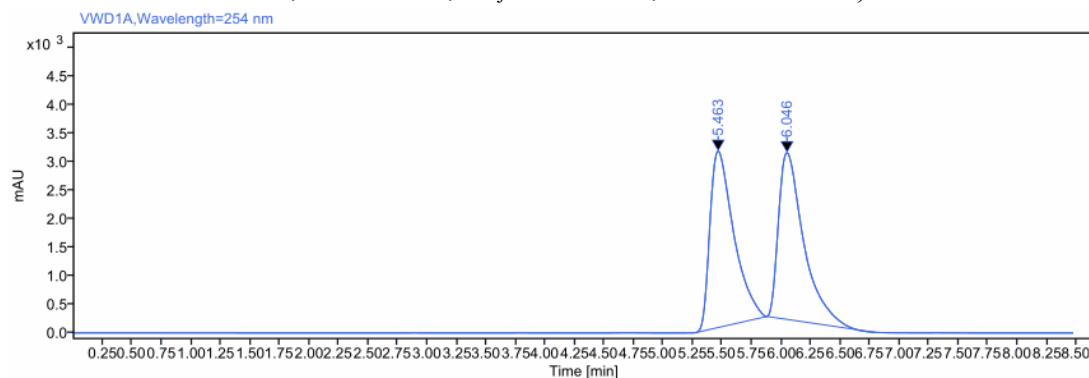

| RT [min] | Type | Width [min] | Area     | Height  | Area% |
|----------|------|-------------|----------|---------|-------|
| 5.463    | MM m | 0.60        | 43476.02 | 3092.36 | 49.99 |
| 6.046    | MM m | 0.92        | 43493.45 | 2923.83 | 50.01 |

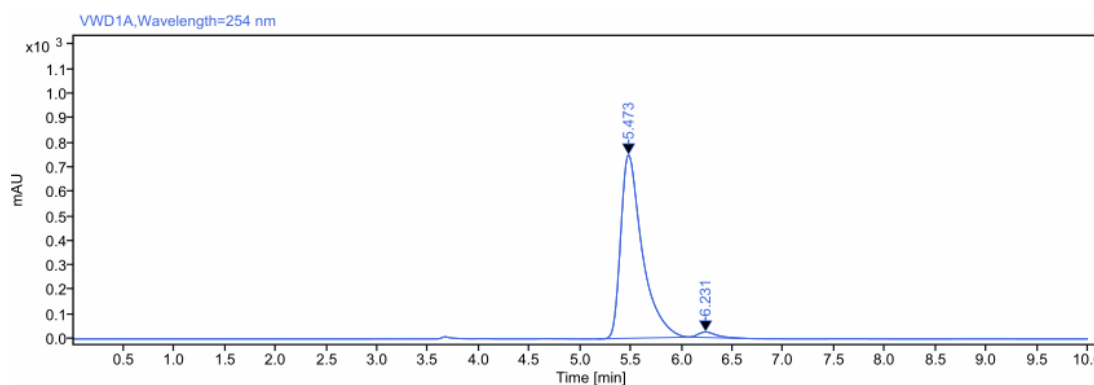

| RT [min] | Type | Width [min] | Area     | Height | Area% |
|----------|------|-------------|----------|--------|-------|
| 5.473    | MM m | 0.91        | 11038.84 | 747.96 | 97.59 |
| 6.231    | MM m | 0.56        | 272.66   | 22.10  | 2.41  |

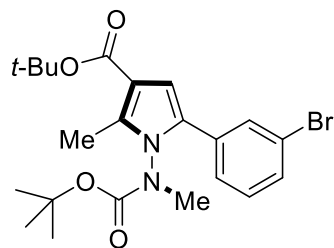

**(*R*)-tert-butyl 5-(3-bromophenyl)-1-((tert-butoxycarbonyl)(methyl)amino)-2-methyl-1H-pyrrole-3-carboxylate (3u)**

Colorless oil.  $[\alpha]_D^{25} = -61.3$  (*c* 0.66, CHCl<sub>3</sub>); <sup>1</sup>H NMR (400 MHz, CDCl<sub>3</sub>) δ 1.36-1.60 (m, 18H), 2.42 (s, 3H), 3.04 (d, *J* = 31.9, 3H), 6.60 (d, *J* = 5.0, 1H), 7.11-7.25 (m, 1H), 7.27-7.33 (m, 1H), 7.43 (d, *J* = 7.8, 1H), 7.53 (d, *J* = 2.2, 1H); <sup>13</sup>C NMR (100 MHz,



CDCl<sub>3</sub>) δ 164.5, 154.1, 136.9, 133.3, 130.6, 130.5, 130.5, 130.3, 130.1, 130.1, 130.0, 126.6, 125.8, 122.8, 112.6, 109.1, 108.7, 82.8, 82.7, 80.1, 79.9, 38.8, 37.6, 28.6, 28.6, 28.4, 28.2, 10.5. HRMS (ESI) calcd for C<sub>22</sub>H<sub>29</sub>BrN<sub>2</sub>O<sub>4</sub> *m/z* [M+H]<sup>+</sup>: 465.1383, found: 465.1393. Enantiomeric excess was found to be 96% by chiral HPLC (ChiralPak OD column, hexane/*i*-PrOH = 95:5, 1.0 ml/min, *t*<sub>major</sub> = 9.1 min, *t*<sub>minor</sub> = 5.2 min).

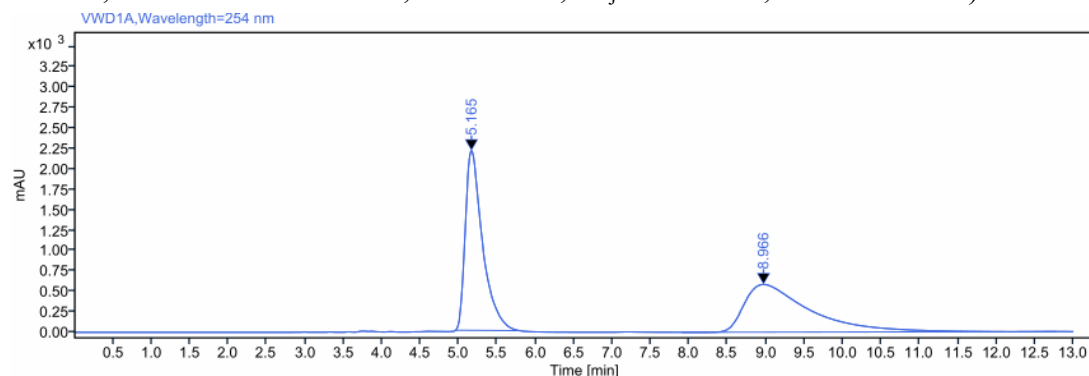

| RT [min] | Type | Width [min] | Area     | Height  | Area% |
|----------|------|-------------|----------|---------|-------|
| 5.165    | MM m | 0.83        | 34444.48 | 2203.26 | 50.09 |
| 8.966    | MM m | 4.88        | 34313.97 | 584.72  | 49.91 |

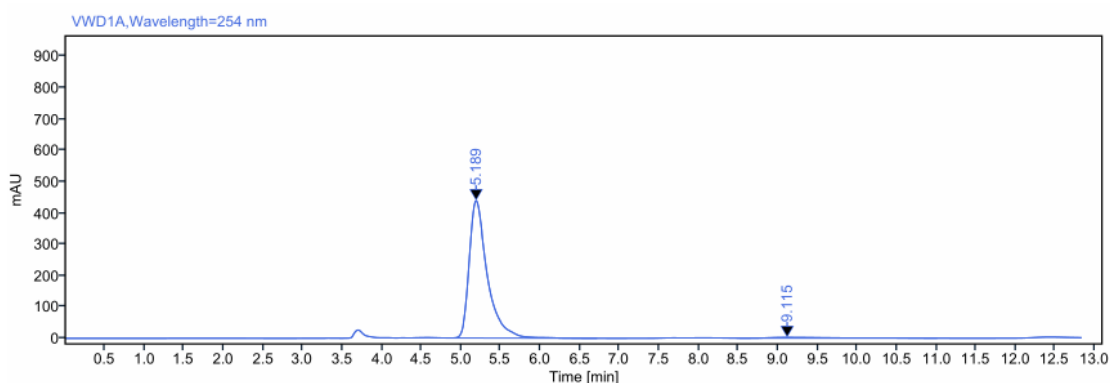

| RT [min] | Type | Width [min] | Area    | Height | Area% |
|----------|------|-------------|---------|--------|-------|
| 5.189    | BB   | 1.91        | 6958.47 | 438.49 | 98.03 |
| 9.115    | MM m | 2.53        | 139.63  | 2.29   | 1.97  |

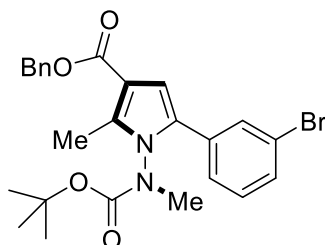

**(*R*)-benzyl 5-(3-bromophenyl)-1-((tert-butoxycarbonyl)(methyl)amino)-2-methyl-1H-pyrrole-3-carboxylate (3v)**

Colorless oil.  $[\alpha]_D^{25} = -59.1$  (*c* 0.54, CHCl<sub>3</sub>); <sup>1</sup>H NMR (400 MHz, CDCl<sub>3</sub>) δ 1.47 (d, *J* = 67.0, 9H), 2.46 (s, 3H), 3.05 (d, *J* = 35.5, 3H), 5.30 (d, *J* = 5.4, 2H), 6.69 (t, *J* = 2.5, 1H), 7.22-7.50 (m, 8H), 7.53 (s, 1H); <sup>13</sup>C NMR (100 MHz, CDCl<sub>3</sub>) δ 164.8, 154.0, 137.9, 133.1, 130.7, 130.6, 130.5, 130.5, 130.4, 130.3, 130.2, 128.7, 128.6, 128.2, 128.2,

128.1, 128.1, 126.6, 125.8, 122.8, 110.8, 109.0, 108.6, 82.9, 82.7, 65.7, 65.6, 38.8, 37.6, 28.3, 28.2, 10.6, 10.6. HRMS (ESI) calcd for C<sub>25</sub>H<sub>27</sub>BrN<sub>2</sub>O<sub>4</sub> *m/z* [M+H]<sup>+</sup>: 499.1227, found: 499.1220. Enantiomeric excess was found to be 95% by chiral HPLC (ChiralPak OD column, hexane/*i*-PrOH = 95:5, 1.0 ml/min, *t*<sub>major</sub> = 9.1 min, *t*<sub>minor</sub> = 5.2 min).

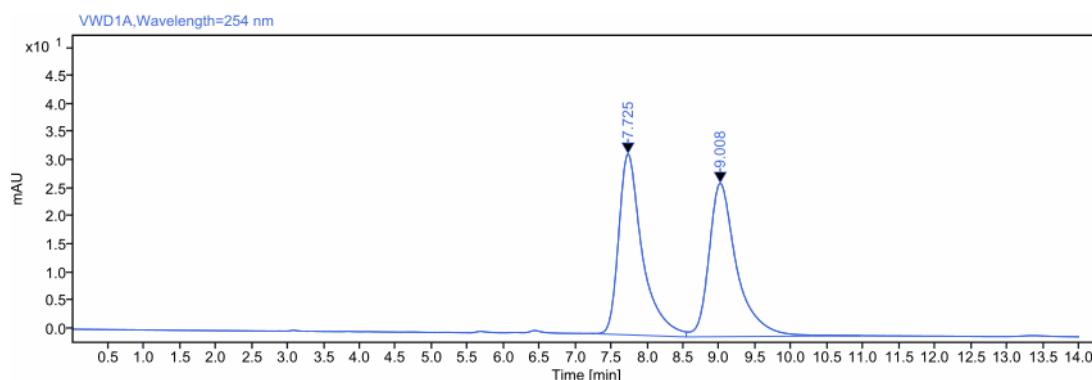

| RT [min] | Type | Width [min] | Area   | Height | Area% |
|----------|------|-------------|--------|--------|-------|
| 7.725    | BM m | 1.33        | 737.86 | 32.19  | 49.97 |
| 9.008    | MB m | 2.42        | 738.78 | 27.30  | 50.03 |

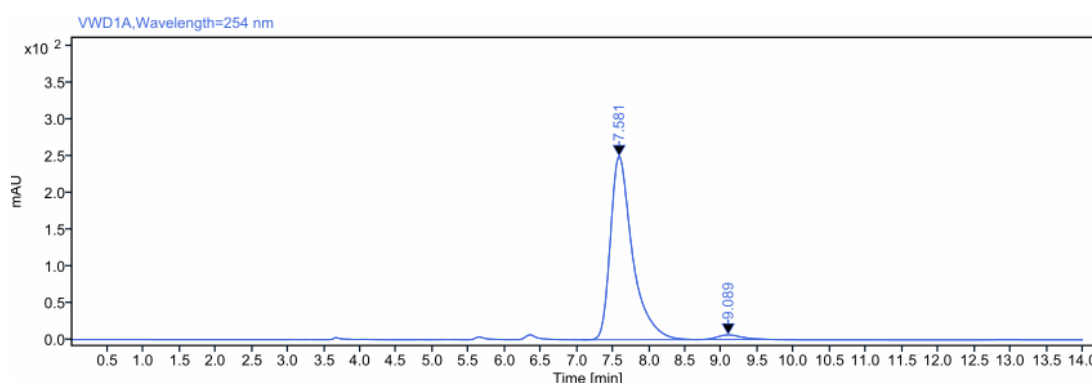

| RT [min] | Type | Width [min] | Area    | Height | Area% |
|----------|------|-------------|---------|--------|-------|
| 7.581    | BB   | 1.61        | 5312.60 | 249.89 | 97.52 |
| 9.089    | MM m | 0.84        | 135.36  | 6.05   | 2.48  |

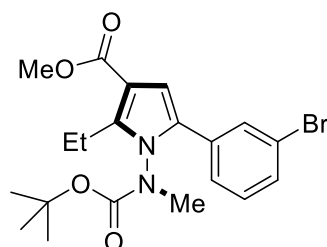

**(*R*)-methyl 5-(3-bromophenyl)-1-((tert-butoxycarbonyl)(methyl)amino)-2-ethyl-1H-pyrrole-3-carboxylate (3w)**

Colorless oil.  $[\alpha]_D^{25} = -64.1$  (*c* 0.41, CHCl<sub>3</sub>); <sup>1</sup>H NMR (400 MHz, CDCl<sub>3</sub>) δ 1.24 (t, *J* = 7.4, 3H), 1.36 (s, 6H), 1.55 (s, 3H), 2.84-2.90 (m, 2H), 3.01 (s, 1H), 3.15 (s, 2H), 3.82 (d, *J* = 8.1, 3H), 6.65 (d, *J* = 4.4, 1H), 7.17-7.25 (m, 1H), 7.27-7.38 (m, 1H), 7.44 (dd, *J* = 2.0, 7.6, 1H), 7.54 (dd, *J* = 1.9, 8.5, 1H); <sup>13</sup>C NMR (100 MHz, CDCl<sub>3</sub>) δ 165.1,

154.1, 143.6, 133.3, 130.9, 130.7, 130.7, 130.7, 130.5, 130.3, 130.1, 126.9, 126.0, 122.8, 110.3, 109.2, 108.8, 82.8, 51.2, 51.1, 39.4, 38.5, 28.3, 28.1, 18.6, 18.4, 13.8, 13.5. HRMS (ESI) calcd for C<sub>20</sub>H<sub>25</sub>BrN<sub>2</sub>O<sub>4</sub> *m/z* [M+H]<sup>+</sup>: 437.1070, found: 437.1064. Enantiomeric excess was found to be 86% by chiral HPLC (ChiralPak OD column, hexane/*i*-PrOH = 95:5, 1.0 ml/min, *t*<sub>major</sub> = 7.7 min, *t*<sub>minor</sub> = 6.2 min).

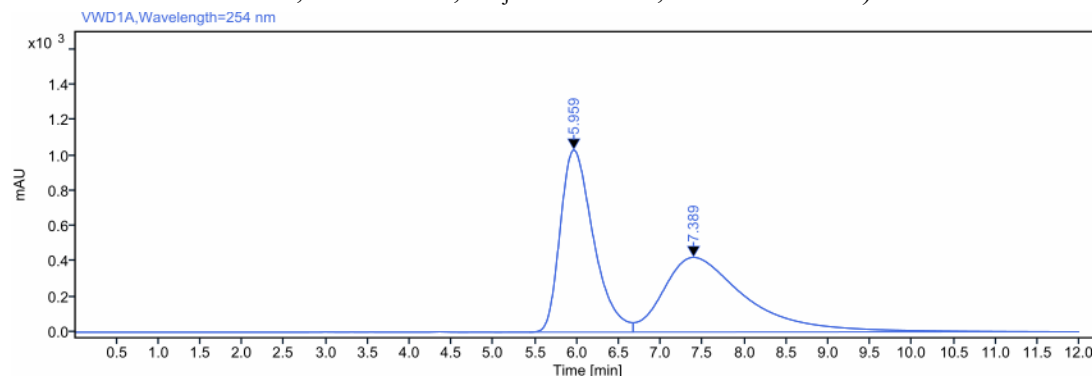

| RT [min] | Type | Width [min] | Area     | Height  | Area% |
|----------|------|-------------|----------|---------|-------|
| 5.959    | BV   | 1.24        | 28452.65 | 1029.94 | 49.66 |
| 7.389    | VBA  | 4.91        | 28840.10 | 422.18  | 50.34 |

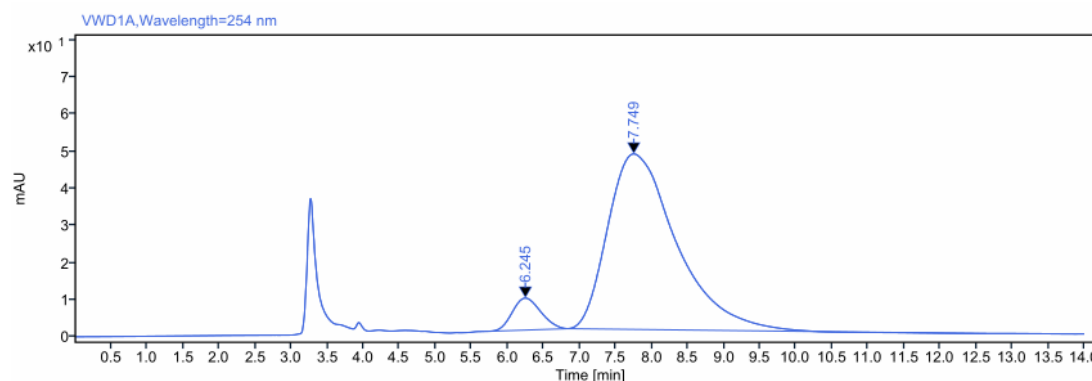

| RT [min] | Type | Width [min] | Area    | Height | Area% |
|----------|------|-------------|---------|--------|-------|
| 6.245    | MM m | 1.10        | 234.82  | 8.60   | 6.98  |
| 7.749    | MB m | 5.80        | 3127.66 | 47.24  | 93.02 |

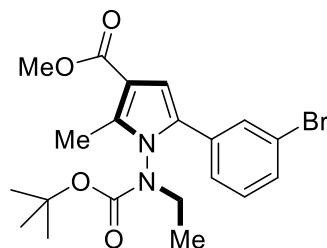

**(*R*)-methyl 5-(3-bromophenyl)-1-((tert-butoxycarbonyl)(ethyl)amino)-2-methyl-1H-pyrrole-3-carboxylate (3x)**

Colorless oil.  $[\alpha]_D^{25} = -74.1$  (*c* 0.35, CHCl<sub>3</sub>); <sup>1</sup>H NMR (400 MHz, CDCl<sub>3</sub>) δ 0.78-0.81 (m, 3H), 1.47 (d, *J* = 2.3, 5H), 1.59 (s, 4H), 2.44 (s, 3H), 3.21-3.70 (m, 2H), 3.74-4.08 (m, 3H), 6.65 (d, *J* = 2.6, 1H), 7.25-7.27 (m, 2H), 7.43 (d, *J* = 7.9, 1H), 7.53 (s, 1H); <sup>13</sup>C

NMR (100 MHz, CDCl<sub>3</sub>)  $\delta$  165.5, 154.1, 138.6, 138.5, 133.5, 130.9, 130.6, 130.3, 130.1, 126.9, 126.1, 122.8, 108.8, 108.6, 82.8, 82.7, 51.2, 51.1, 46.9, 45.3, 28.4, 28.4, 12.7, 12.2, 11.0, 10.9. HRMS (ESI) calcd for C<sub>20</sub>H<sub>25</sub>BrN<sub>2</sub>O<sub>4</sub>  $m/z$  [M+H]<sup>+</sup>: 437.1070, found: 437.1063. Enantiomeric excess was found to be 86% by chiral HPLC (ChiralPak OD column, hexane/*i*-PrOH = 99:1, 1.0 ml/min,  $t_{\text{major}}$  = 11.2 min,  $t_{\text{minor}}$  = 9.6 min).

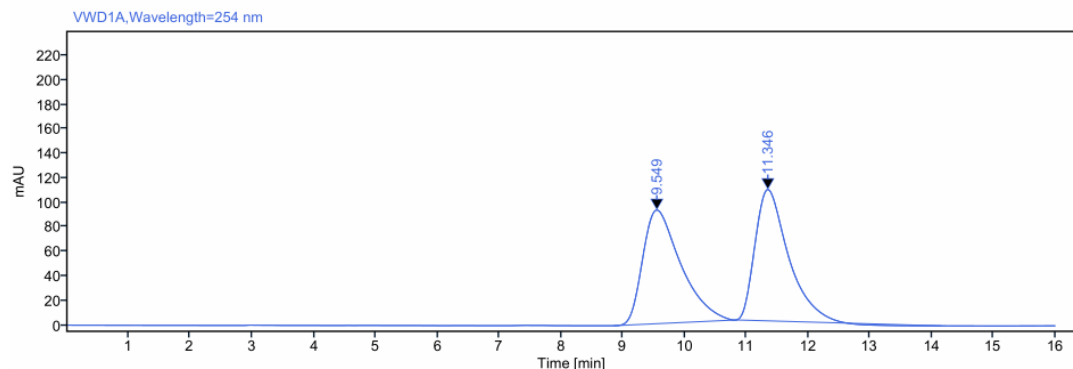

| RT [min] | Type | Width [min] | Area    | Height | Area% |
|----------|------|-------------|---------|--------|-------|
| 9.549    | MM m | 1.98        | 3975.67 | 92.82  | 49.88 |
| 11.346   | MM m | 3.32        | 3995.45 | 107.25 | 50.12 |

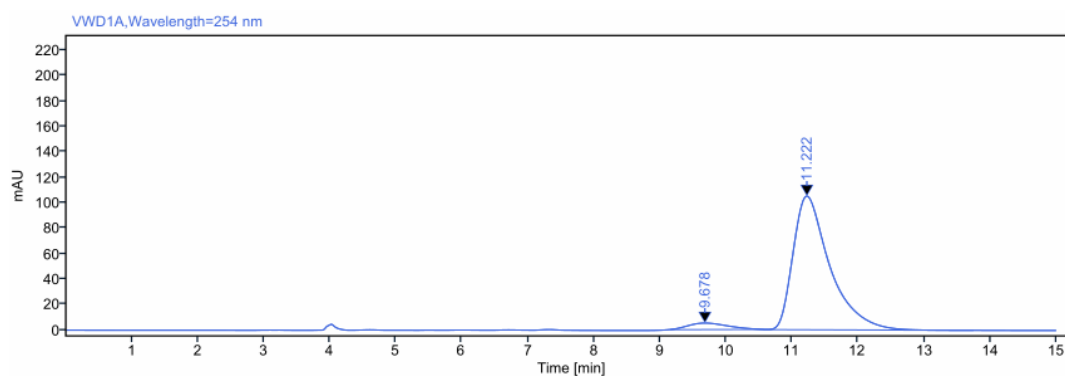

| RT [min] | Type | Width [min] | Area    | Height | Area% |
|----------|------|-------------|---------|--------|-------|
| 9.678    | MM m | 1.41        | 214.08  | 5.11   | 4.99  |
| 11.222   | MM m | 3.18        | 4079.50 | 105.27 | 95.01 |

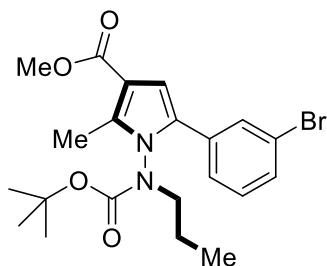

**(*R*)-methyl 5-(3-bromophenyl)-1-((*tert*-butoxycarbonyl)(propyl)amino)-2-methyl-1H-pyrrole-3-carboxylate (3y)**

Colorless oil.  $[\alpha]_D^{25} = -62.2$  ( $c$  0.39, CHCl<sub>3</sub>); <sup>1</sup>H NMR (400 MHz, CDCl<sub>3</sub>)  $\delta$  = 0.68 (q,  $J$  = 6.7, 3H), 1.22-1.25 (m, 2H), 1.48 (s, 5H), 1.59 (s, 4H), 2.44 (s, 3H), 3.10-3.45 (m, 2H), 3.82 (d,  $J$  = 8.8, 3H), 6.64 (d,  $J$  = 2.7, 1H), 7.23 (d,  $J$  = 6.5, 1H), 7.30 (t,  $J$  = 8.0,

1H), 7.44 (d,  $J = 7.9$ , 1H), 7.54 (s, 1H);  $^{13}\text{C}$  NMR (100 MHz,  $\text{CDCl}_3$ )  $\delta$  154.3, 138.3, 133.4, 131.0, 130.9, 130.7, 130.6, 130.3, 130.1, 126.9, 126.2, 122.8, 110.6, 108.8, 108.6, 82.8, 82.7, 54.0, 52.5, 51.2, 51.1, 28.4, 28.4, 21.0, 20.5, 11.2, 11.1, 11.0, 10.9. HRMS (ESI) calcd for  $\text{C}_{21}\text{H}_{27}\text{BrN}_2\text{O}_4$   $m/z$   $[\text{M}+\text{H}]^+$ : 451.1227, found: 451.1219. Enantiomeric excess was found to be 90% by chiral HPLC (ChiralPak OD column, hexane/*i*-PrOH = 99:1, 1.0 ml/min,  $t_{\text{major}} = 10.4$  min,  $t_{\text{minor}} = 8.0$  min).

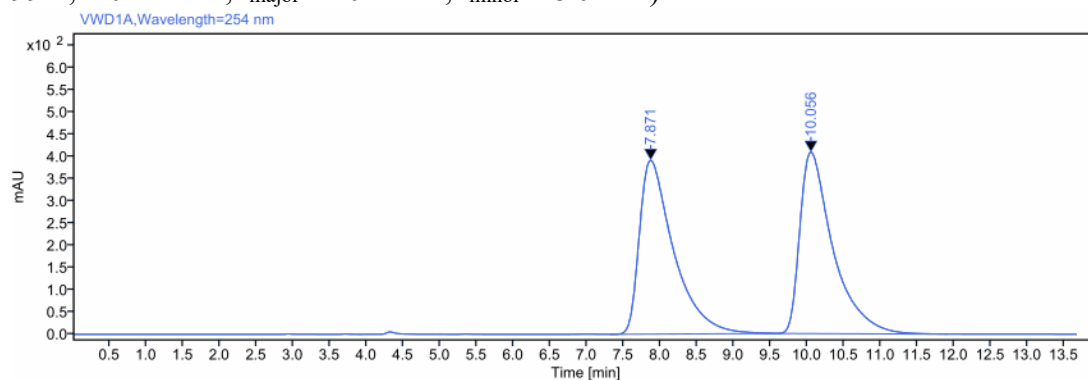

| RT [min] | Type | Width [min] | Area     | Height | Area% |
|----------|------|-------------|----------|--------|-------|
| 7.871    | BM m | 2.25        | 12656.65 | 390.26 | 49.75 |
| 10.056   | MM m | 2.35        | 12785.87 | 407.30 | 50.25 |

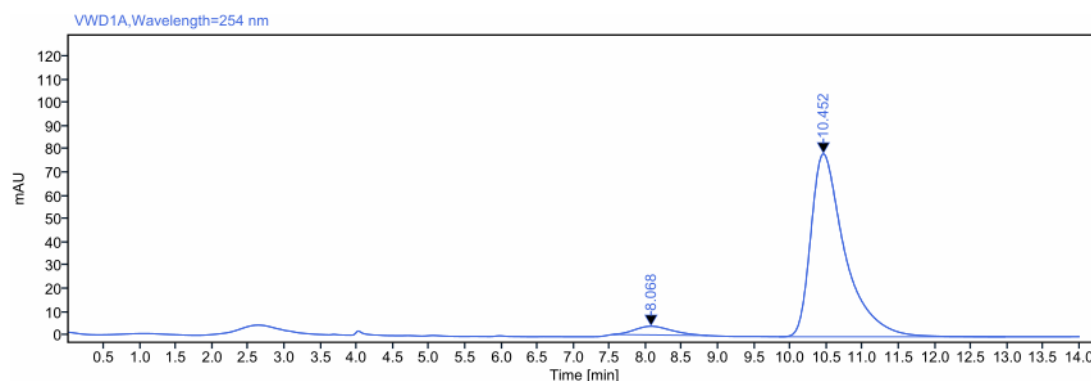

| RT [min] | Type | Width [min] | Area    | Height | Area% |
|----------|------|-------------|---------|--------|-------|
| 8.068    | MM m | 1.31        | 132.40  | 3.71   | 4.88  |
| 10.452   | BB   | 3.13        | 2578.41 | 78.65  | 95.12 |

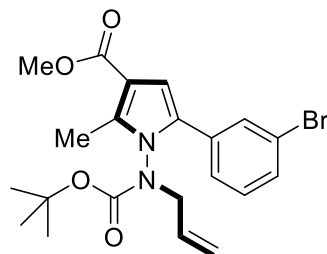

**(*R*)-methyl 1-(allyl(tert-butoxycarbonyl)amino)-5-(3-bromophenyl)-2-methyl-1H-pyrrole-3-carboxylate (3z)**

Yellow oil.  $[\alpha]_D^{25} = -36.5$  ( $c$  0.5,  $\text{CHCl}_3$ );  $^1\text{H}$  NMR (400 MHz,  $\text{CDCl}_3$ )  $\delta$  0.13-0.35 (m, 1H), 0.35-0.49 (m, 1H), 0.57 (d,  $J = 15.8$ , 2H), 1.47 (s, 5H), 1.59 (s, 4H), 2.41 (s, 3H), 2.76 (d,  $J = 53.1$ , 1H), 3.82 (d,  $J = 6.4$ , 3H), 6.62 (s, 1H), 7.22 (d,  $J = 7.9$ , 1H), 7.28 (s,

1H), 7.43-7.45 (m, 1H), 7.51 (d,  $J = 2.7$ , 1H);  $^{13}\text{C}$  NMR (100 MHz,  $\text{CDCl}_3$ )  $\delta$  165.6, 154.7, 137.8, 131.2, 131.0, 130.8, 130.7, 130.6, 130.3, 126.9, 126.3, 122.7, 110.5, 108.3, 83.1, 82.9, 51.2, 33.1, 32.8, 28.3, 10.7, 7.7, 6.9, 6.7. HRMS (ESI) calcd for  $\text{C}_{21}\text{H}_{26}\text{BrN}_2\text{O}_4$   $m/z$   $[\text{M}+\text{H}]^+$ : 449.1071, found: 449.1078. Enantiomeric excess was found to be 80% by chiral HPLC (ChiralPak OD column, hexane/*i*-PrOH = 99:1, 1.0 ml/min,  $t_{\text{major}} = 9.3$  min,  $t_{\text{minor}} = 8.8$  min).

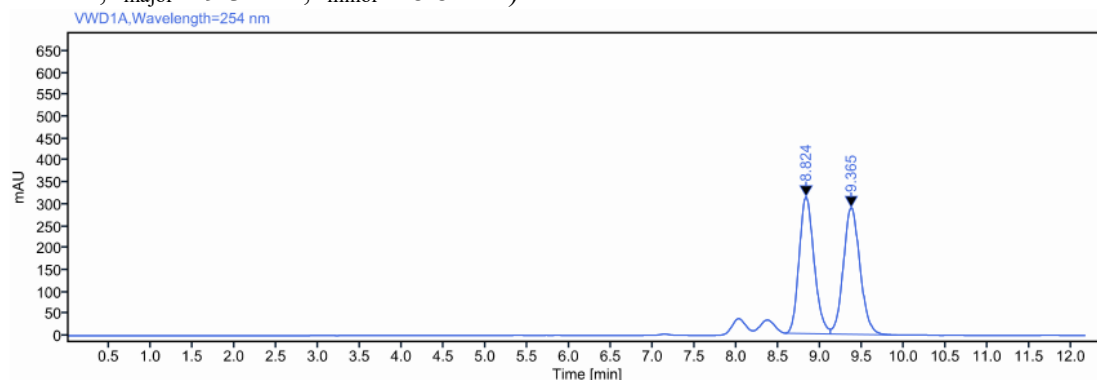

| RT [min] | Type | Width [min] | Area    | Height | Area% |
|----------|------|-------------|---------|--------|-------|
| 8.824    | BV   | 0.54        | 3882.33 | 311.50 | 49.19 |
| 9.365    | VB   | 0.79        | 4010.49 | 288.69 | 50.81 |

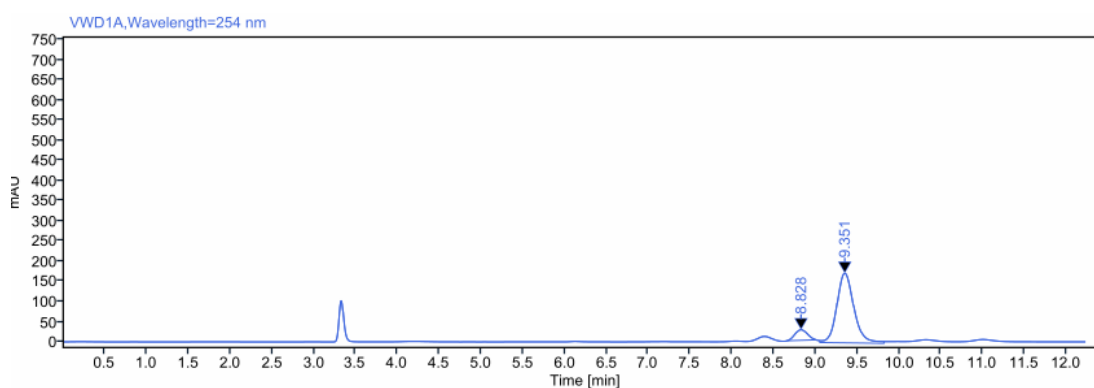

| RT [min] | Type | Width [min] | Area    | Height | Area% |
|----------|------|-------------|---------|--------|-------|
| 8.828    | MM m | 0.35        | 271.69  | 26.17  | 9.95  |
| 9.351    | MM m | 0.77        | 2457.59 | 172.40 | 90.05 |

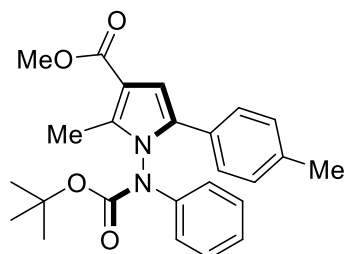

**(*S*)-methyl 5-(3-bromophenyl)-1-((tert-butoxycarbonyl)(phenyl)amino)-2-methyl-1H-pyrrole-3-carboxylate (3aa)**

Colorless oil.  $[\alpha]_D^{25} = -0.49$  ( $c$  0.41,  $\text{CHCl}_3$ );  $^1\text{H}$  NMR (400 MHz,  $\text{CDCl}_3$ )  $\delta$  1.33 (s, 9H), 2.35 (d,  $J = 40.6$ , 6H), 3.85 (s, 3H), 6.71 (s, 1H), 7.04-7.31 (m, 9H);  $^{13}\text{C}$  NMR (100

MHz, CDCl<sub>3</sub>) δ 165.2, 153.9, 138.5, 137.0, 136.4, 131.4, 131.4, 129.3, 129.1, 129.0, 128.3, 128.2, 127.6, 127.5, 126.5, 124.4, 91.5, 84.5, 82.7, 51.3, 51.2, 38.6, 37.5, 28.3, 28.2, 21.6, 21.5, 10.8, 10.7. HRMS (ESI) calcd for C<sub>25</sub>H<sub>28</sub>N<sub>2</sub>O<sub>4</sub> *m/z* [M+H]<sup>+</sup>: 421.2122, found: 421.2126. Enantiomeric excess was found to be 90% by chiral HPLC (ChiralPak IC column, hexane/*i*-PrOH = 95:5, 1.0 ml/min, *t*<sub>major</sub> = 7.0 min, *t*<sub>minor</sub> = 8.6 min).

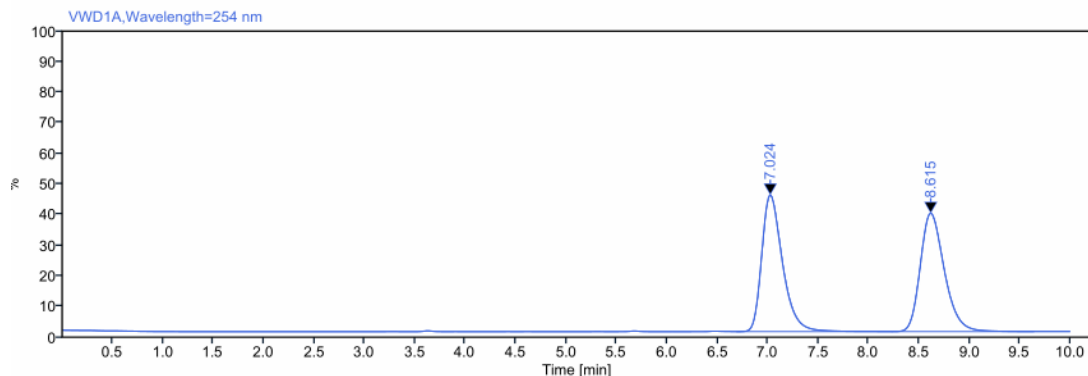

| RT [min] | Type | Width [min] | Area     | Height | Area% |
|----------|------|-------------|----------|--------|-------|
| 7.024    | VB   | 1.54        | 11654.84 | 810.59 | 50.01 |
| 8.615    | BB   | 1.41        | 11650.81 | 701.88 | 49.99 |

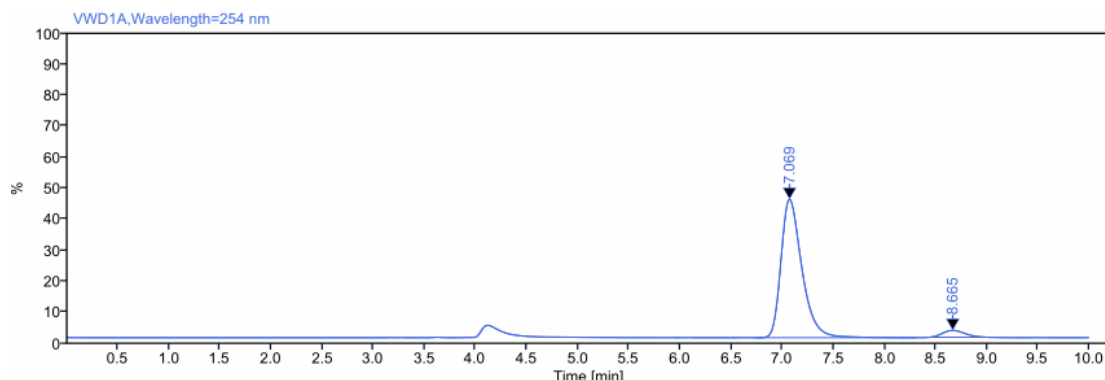

| RT [min] | Type | Width [min] | Area     | Height | Area% |
|----------|------|-------------|----------|--------|-------|
| 7.069    | VM m | 1.56        | 11431.74 | 803.48 | 95.00 |
| 8.665    | MM m | 0.55        | 601.52   | 39.91  | 5.00  |

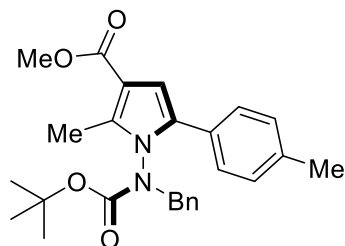

**(S)-methyl 1-(benzyl(tert-butoxycarbonyl)amino)-2-methyl-5-(p-tolyl)-1H-pyrrole-3-carboxylate (3ab)**

Colorless oil.  $[\alpha]_D^{25} = -12.8$  (*c* 1.0, CHCl<sub>3</sub>); <sup>1</sup>H NMR (400 MHz, CDCl<sub>3</sub>) δ 1.56 (t, *J* = 2.0, 6H), 1.71 (s, 3H), 1.95 (dt, *J* = 2.0, 14.6, 3H), 2.47 (d, *J* = 3.1, 3H), 3.77-3.90 (m, 3H), 3.95 (t, *J* = 13.4, 1H), 4.92 (dd, *J* = 14.6, 89.8, 1H), 6.67 (d, *J* = 3.0, 1H), 7.01 (dd, *J* =

7.4, 24.5, 2H), 7.18-7.39 (m, 8H);  $^{13}\text{C}$  NMR (100 MHz,  $\text{CDCl}_3$ )  $\delta$  165.8, 154.2, 138.5, 137.6, 134.6, 131.4, 129.9, 129.6, 129.5, 129.4, 128.6, 128.6, 128.5, 128.4, 128.4, 128.1, 127.5, 109.8, 108.0, 107.7, 82.9, 82.6, 55.3, 53.4, 51.0, 51.0, 28.5, 28.4, 21.3, 10.5. HRMS (ESI) calcd for  $\text{C}_{26}\text{H}_{30}\text{N}_2\text{O}_4$   $m/z$   $[\text{M}+\text{H}]^+$ : 435.2278, found: 435.2273. Enantiomeric excess was found to be 80% by chiral HPLC (ChiralPak IC column, hexane/*i*-PrOH = 96:4, 1.0 ml/min,  $t_{\text{major}} = 5.6$  min,  $t_{\text{minor}} = 5.0$  min).

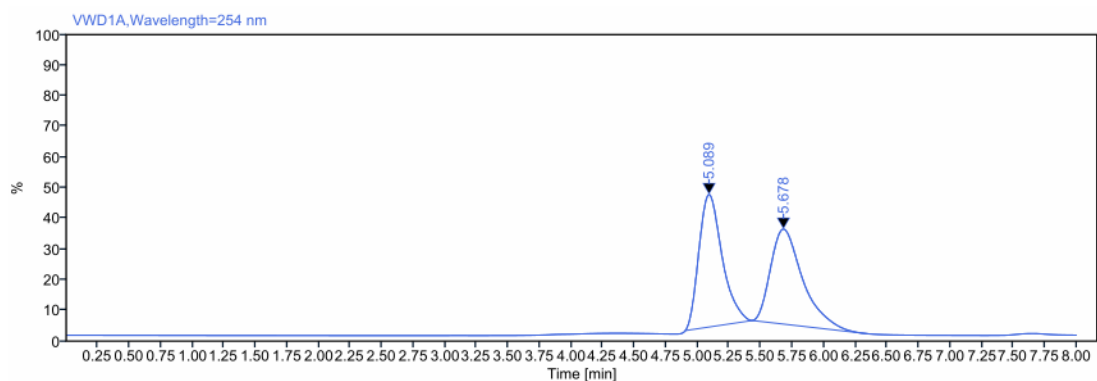

| RT [min] | Type | Width [min] | Area    | Height | Area% |
|----------|------|-------------|---------|--------|-------|
| 5.089    | MM m | 0.53        | 3254.66 | 253.62 | 50.18 |
| 5.678    | MM m | 0.92        | 3230.70 | 181.76 | 49.82 |

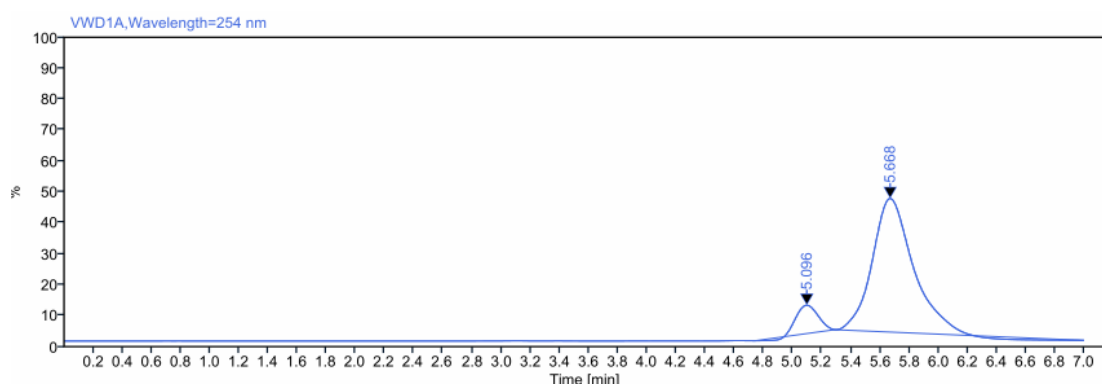

| RT [min] | Type | Width [min] | Area    | Height | Area% |
|----------|------|-------------|---------|--------|-------|
| 5.096    | MM m | 0.55        | 250.28  | 24.88  | 9.94  |
| 5.668    | MM m | 1.71        | 2268.84 | 117.41 | 90.06 |

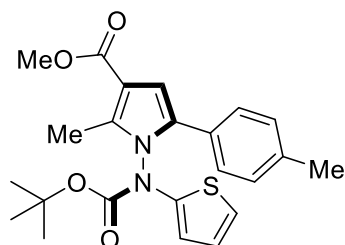

**(S)-methyl 1-((tert-butoxycarbonyl)(thiophen-2-yl)amino)-2-methyl-5-(p-tolyl)-1H-pyrrole-3-carboxylate (3ac)**

Yellow oil.  $[\alpha]_D^{25} = -28.6$  ( $c$  0.29,  $\text{CHCl}_3$ );  $^1\text{H}$  NMR (400 MHz,  $\text{CDCl}_3$ )  $\delta$  1.28 (s, 9H), 2.35 (d,  $J = 39.2$ , 6H), 3.85 (s, 3H), 6.06 (s, 1H), 6.73 (d,  $J = 17.8$ , 2H), 6.91 (d,  $J = 5.2$ ,



1H), 7.01-7.23 (m, 4H); <sup>13</sup>C NMR (100 MHz, CDCl<sub>3</sub>) δ 165.6, 151.1, 142.7, 137.7, 137.0, 132.8, 129.5, 127.7, 127.3, 124.6, 119.5, 112.4, 111.2, 107.5, 84.3, 51.2, 27.9, 21.3, 10.5. HRMS (ESI) calcd for C<sub>23</sub>H<sub>26</sub>N<sub>2</sub>O<sub>4</sub>S *m/z* [M+H]<sup>+</sup>: 427.1686, found: 427.1684. Enantiomeric excess was found to be 88% by chiral HPLC (ChiralPak IC column, hexane/*i*-PrOH = 95:5, 1.0 ml/min, *t*<sub>major</sub> = 5.7 min, *t*<sub>minor</sub> = 4.7 min).

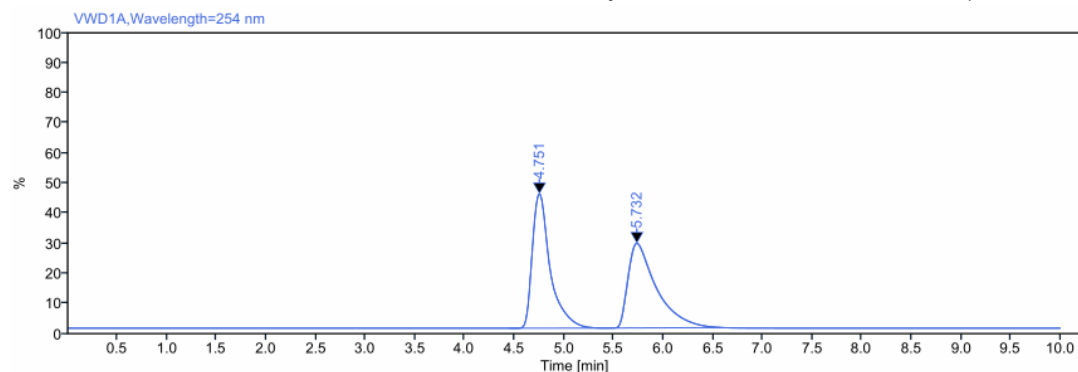

| RT [min] | Type | Width [min] | Area     | Height  | Area% |
|----------|------|-------------|----------|---------|-------|
| 4.751    | BB   | 1.00        | 40919.68 | 3273.76 | 50.00 |
| 5.732    | BM m | 1.14        | 40922.49 | 2063.71 | 50.00 |

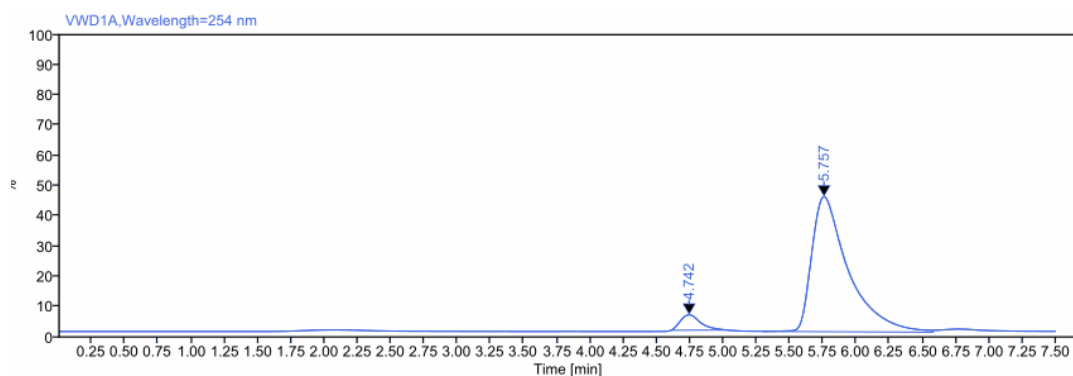

| RT [min] | Type | Width [min] | Area     | Height | Area% |
|----------|------|-------------|----------|--------|-------|
| 4.742    | MM m | 0.42        | 934.45   | 88.94  | 5.90  |
| 5.757    | MM m | 1.29        | 14890.73 | 779.37 | 94.10 |

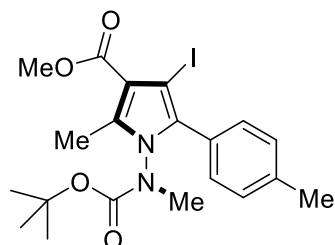

**(*R*)-methyl 1-((tert-butoxycarbonyl)(methyl)amino)-4-iodo-2-methyl-5-(*p*-tolyl)-1H-pyrrole-3-carboxylate (4)**

Yellow solid. [ $\alpha$ ]<sub>D</sub><sup>25</sup> = -59.3 (*c* 0.46, CHCl<sub>3</sub>); <sup>1</sup>H NMR (400 MHz, CDCl<sub>3</sub>) δ 1.46 (d, *J* = 29.5, 9H), 2.43 (d, *J* = 10.5, 6H), 2.94 (d, *J* = 34.4, 3H), 3.88 (d, *J* = 9.4, 3H), 7.16-7.31

(m, 4H);  $^{13}\text{C}$  NMR (100 MHz,  $\text{CDCl}_3$ )  $\delta$  164.5, 153.7, 139.0, 138.8, 137.6, 135.8, 130.7, 130.5, 129.2, 129.1, 127.9, 112.0, 82.6, 82.5, 63.1, 51.0, 51.0, 38.7, 37.7, 28.2, 28.2, 21.6, 21.5, 11.6, 11.5. HRMS (ESI) calcd for  $\text{C}_{20}\text{H}_{25}\text{N}_2\text{O}_4$   $m/z$   $[\text{M}+\text{H}]^+$ : 485.0932, found: 485.0929. Enantiomeric excess was found to be 93% by chiral HPLC (ChiralPak IF column, hexane/*i*-PrOH = 99:1, 0.5 ml/min,  $t_{\text{major}}$  = 37.4 min,  $t_{\text{minor}}$  = 32.2 min).

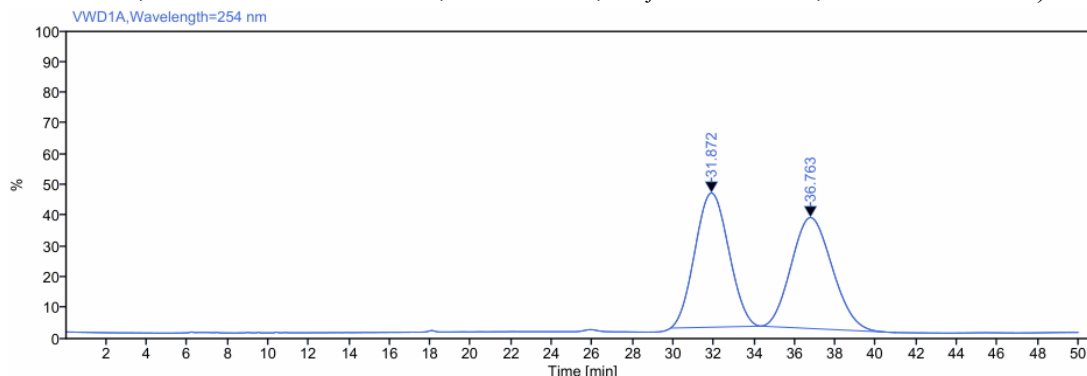

| RT [min] | Type | Width [min] | Area    | Height | Area% |
|----------|------|-------------|---------|--------|-------|
| 31.872   | MB m | 4.46        | 4731.26 | 40.68  | 50.03 |
| 36.763   | BM m | 6.69        | 4725.30 | 33.62  | 49.97 |

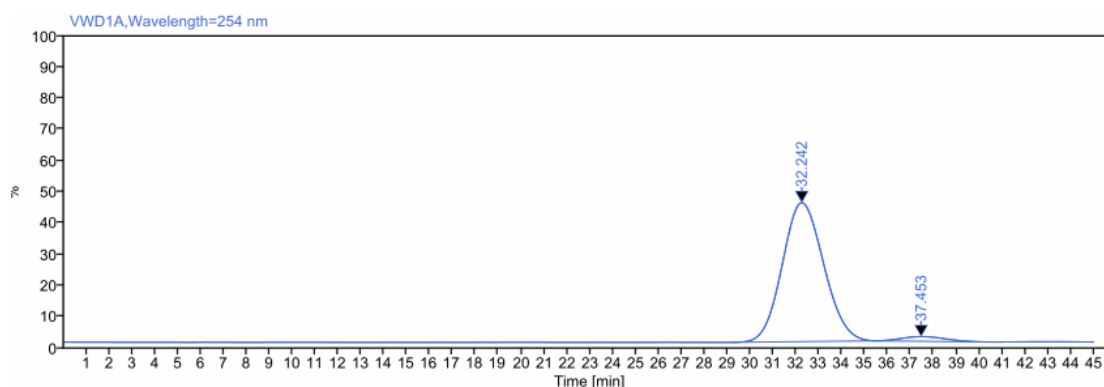

| RT [min] | Type | Width [min] | Area     | Height | Area% |
|----------|------|-------------|----------|--------|-------|
| 32.242   | BB   | 6.36        | 20183.34 | 160.42 | 96.64 |
| 37.453   | MM m | 5.06        | 702.51   | 5.36   | 3.36  |

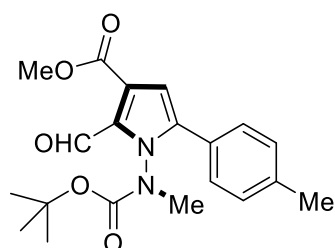

**(*R*)-methyl 1-((tert-butoxycarbonyl)(methyl)amino)-2-formyl-5-(*p*-tolyl)-1H-pyrrole-3-carboxylate (5)**

Colorless oil.  $[\alpha]_D^{25} = -42.9$  ( $c$  0.72,  $\text{CHCl}_3$ );  $^1\text{H}$  NMR (400 MHz,  $\text{CDCl}_3$ )  $\delta$  1.32 (s, 6H), 1.54 (s, 3H), 2.40 (s, 3H), 3.07 (d,  $J = 15.0$ , 3H), 3.91 (d,  $J = 10.4$ , 3H), 6.76 (t,  $J = 2.8$ ,

1H), 7.24 (d,  $J = 7.9$ , 2H), 7.36 (dd,  $J = 2.9$ , 8.0, 2H), 10.23-10.60 (m, 1H);  $^{13}\text{C}$  NMR (100 MHz,  $\text{CDCl}_3$ )  $\delta$  181.0, 180.7, 154.1, 139.8, 139.6, 129.6, 129.5, 129.4, 128.6, 128.3, 126.2, 126.1, 123.1, 110.2, 109.9, 82.8, 82.3, 52.2, 52.1, 39.2, 37.8, 28.3, 28.1, 21.5, 21.5. HRMS (ESI) calcd for  $\text{C}_{20}\text{H}_{24}\text{N}_2\text{O}_5$   $m/z$   $[\text{M}+\text{H}]^+$ : 373.1758, found: 373.1755. Enantiomeric excess was found to be 90% by chiral HPLC (ChiralPak AD column, hexane/*i*-PrOH = 99:1, 1 ml/min,  $t_{\text{major}} = 47.2$  min,  $t_{\text{minor}} = 27.8$  min).

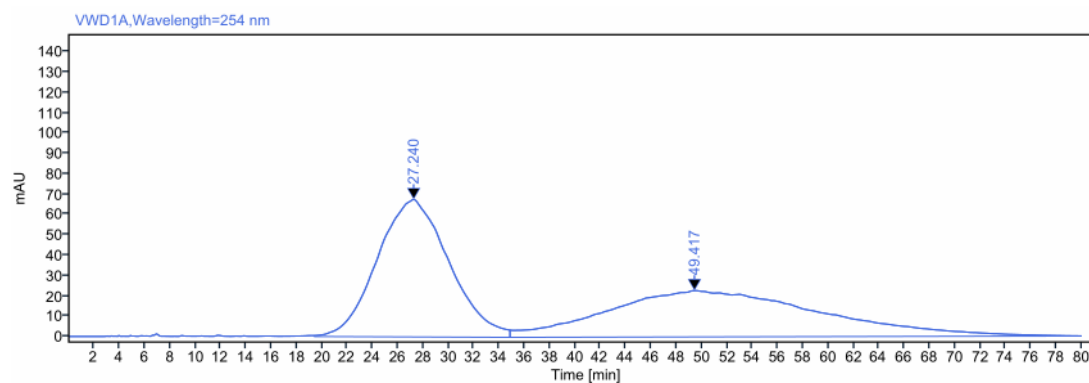

| RT [min] | Type | Width [min] | Area     | Height | Area% |
|----------|------|-------------|----------|--------|-------|
| 27.240   | MM m | 15.46       | 26572.97 | 67.54  | 50.15 |
| 49.417   | MM m | 45.15       | 26409.19 | 22.74  | 49.85 |

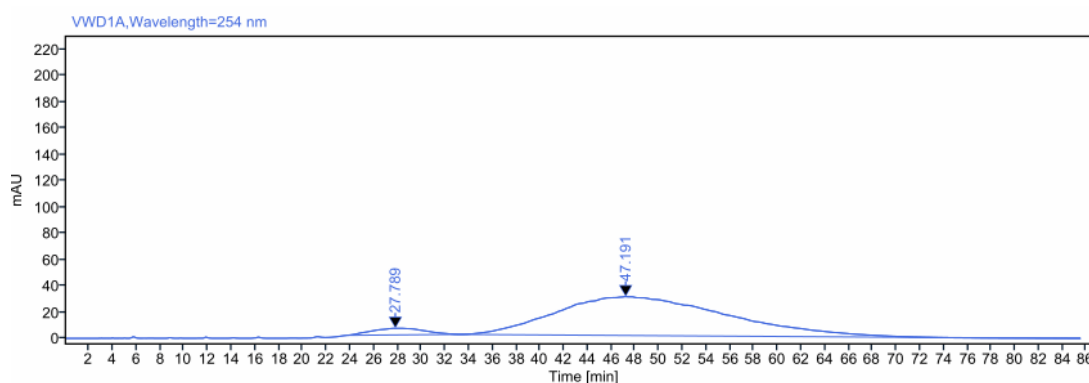

| RT [min] | Type | Width [min] | Area     | Height | Area% |
|----------|------|-------------|----------|--------|-------|
| 27.789   | MM m | 9.36        | 1527.40  | 4.99   | 4.90  |
| 47.191   | MM m | 52.35       | 29632.03 | 29.59  | 95.10 |

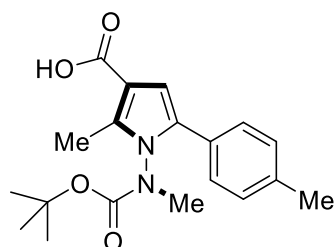

**(R)- 1-((tert-butoxycarbonyl)(methyl)amino)-2-methyl-5-(p-tolyl)-1H-pyrrole-3-carboxylic acid (6)**

Colorless oil.  $[\alpha]_D^{25} = -63.8$  ( $c$  0.27,  $\text{CHCl}_3$ );  $^1\text{H}$  NMR (400 MHz,  $\text{CDCl}_3$ )  $\delta$  1.46 (d,  $J =$

73.3, 9H), 2.43 (d,  $J = 40.1$ , 6H), 3.05 (d,  $J = 51.9$ , 3H), 6.66 (s, 1H), 7.14-7.27 (m, 4H);  $^{13}\text{C}$  NMR (100 MHz,  $\text{CDCl}_3$ )  $\delta$  170.4, 170.2, 154.2, 138.4, 138.2, 137.7, 132.4, 129.5, 129.4, 128.2, 128.1, 127.5, 109.8, 108.2, 107.8, 82.6, 82.4, 38.7, 37.5, 28.3, 28.2, 21.4, 21.3, 10.7, 10.7. HRMS (ESI) calcd for  $\text{C}_{19}\text{H}_{24}\text{N}_2\text{O}_4$   $m/z$   $[\text{M}+\text{H}]^+$ : 345.1809, found: 345.1817. Enantiomeric excess was found to be 92% by chiral HPLC (ChiralPak IC column, hexane/*i*-PrOH = 80:20, 0.7 ml/min,  $t_{\text{major}} = 34.1$  min,  $t_{\text{minor}} = 16.3$  min).

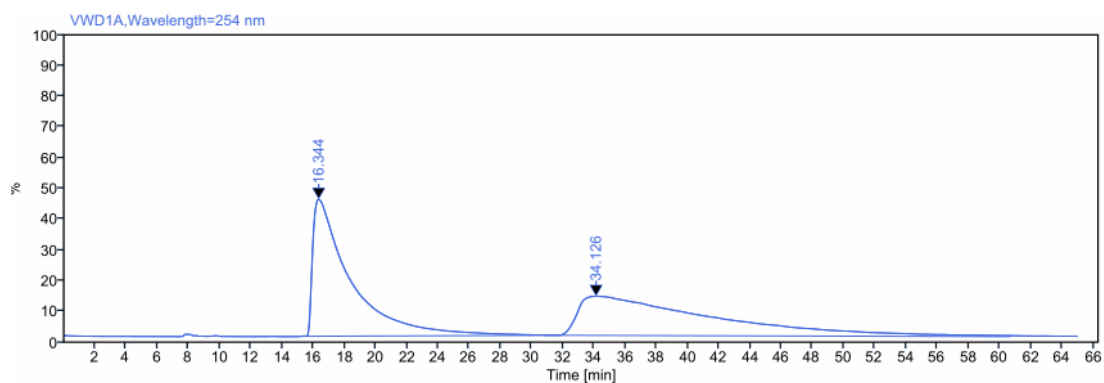

| RT [min] | Type | Width [min] | Area     | Height | Area% |
|----------|------|-------------|----------|--------|-------|
| 16.344   | MM m | 16.41       | 10772.49 | 64.03  | 49.98 |
| 34.126   | MM m | 29.02       | 10781.39 | 18.25  | 50.02 |

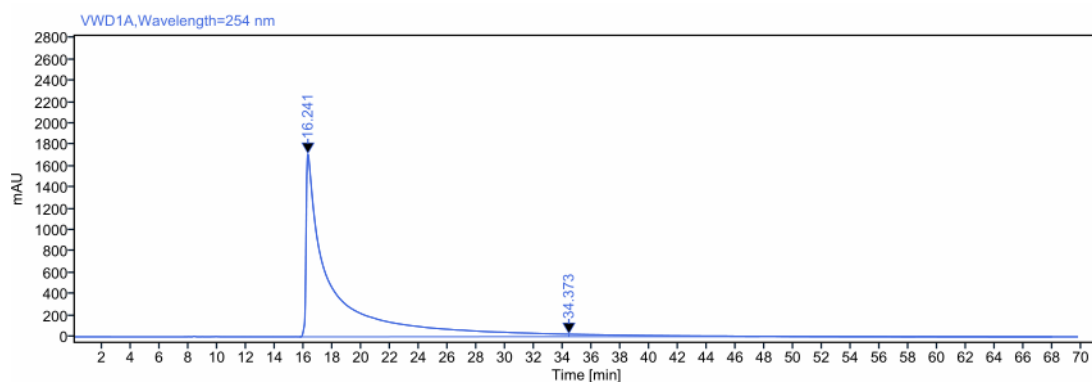

| RT [min] | Type | Width [min] | Area      | Height  | Area% |
|----------|------|-------------|-----------|---------|-------|
| 16.241   | VM m | 18.70       | 207020.97 | 1713.93 | 95.92 |
| 34.373   | MM m | 33.58       | 8800.91   | 21.72   | 4.08  |

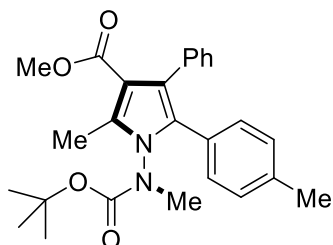

**(R)-methyl 1-((tert-butoxycarbonyl)(methyl)amino)-2-methyl-4-phenyl-5-(p-tolyl)-1H-pyrrole-3-carboxylate (7)**

Yellow oil.  $[\alpha]_D^{25} = -91.6$  ( $c$  0.31,  $\text{CHCl}_3$ );  $^1\text{H}$  NMR (400 MHz,  $\text{CDCl}_3$ )  $\delta$  1.47 (d,  $J =$

42.9, 9H), 2.37 (d,  $J = 73.4$ , 6H), 2.98 (d,  $J = 47.7$ , 3H), 3.62 (d,  $J = 11.9$ , 3H), 7.00 (d,  $J = 11.1$ , 4H), 7.16 (d,  $J = 11.0$ , 5H);  $^{13}\text{C}$  NMR (100 MHz,  $\text{CDCl}_3$ )  $\delta$  166.1, 154.2, 137.6, 137.4, 136.0, 135.3, 130.9, 130.8, 130.5, 130.4, 130.3, 129.0, 128.9, 127.4, 127.3, 126.1, 126.0, 122.2, 82.4, 82.2, 50.8, 50.7, 38.8, 37.7, 28.3, 28.3, 21.4, 21.4, 11.0, 10.9. HRMS (ESI) calcd for  $\text{C}_{26}\text{H}_{30}\text{N}_2\text{O}_4$   $m/z$   $[\text{M}+\text{H}]^+$ : 435.2278, found: 435.2269. Enantiomeric excess was found to be 92% by chiral HPLC (ChiralPak IF column, hexane/*i*-PrOH = 99:1, 1 ml/min,  $t_{\text{major}} = 13.4$  min,  $t_{\text{minor}} = 16.8$  min).

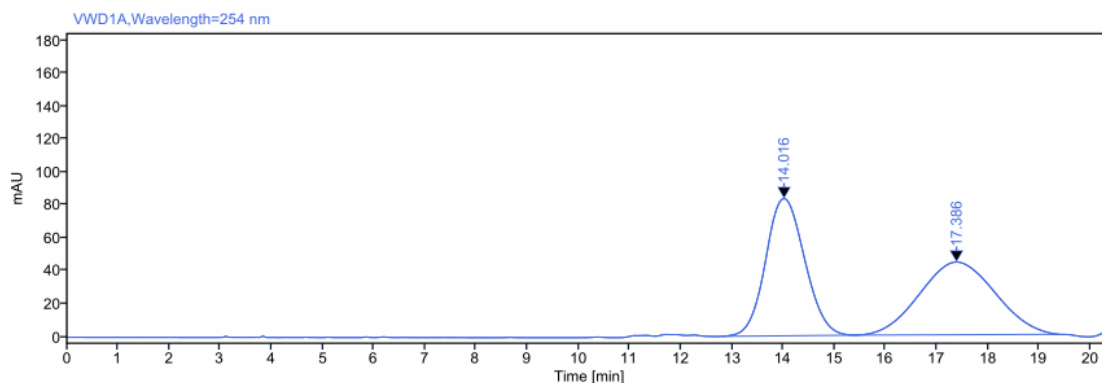

| RT [min] | Type | Width [min] | Area    | Height | Area% |
|----------|------|-------------|---------|--------|-------|
| 14.016   | MM m | 2.57        | 4416.07 | 83.34  | 49.44 |
| 17.386   | MM m | 3.99        | 4516.13 | 44.12  | 50.56 |

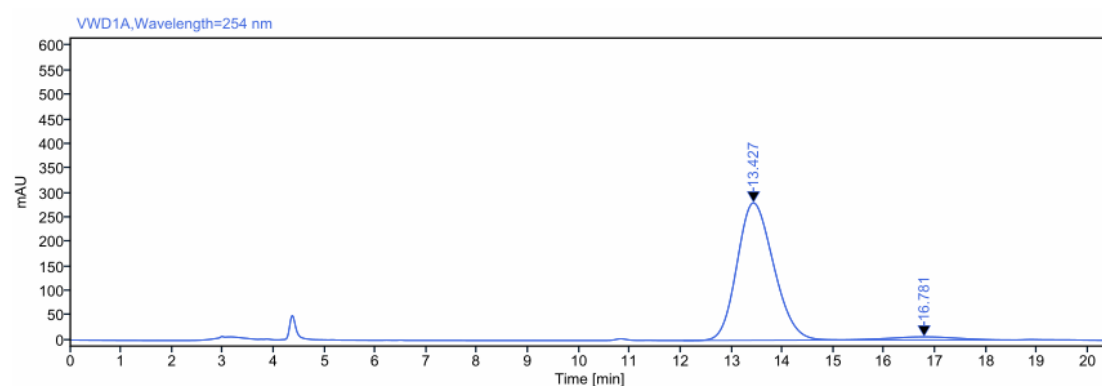

| RT [min] | Type | Width [min] | Area     | Height | Area% |
|----------|------|-------------|----------|--------|-------|
| 13.427   | MM m | 3.13        | 13996.05 | 280.45 | 96.11 |
| 16.781   | MM m | 3.30        | 566.00   | 6.22   | 3.89  |

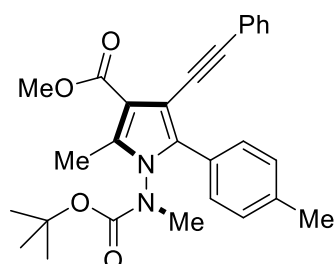

**(*R*)-methyl 1-((tert-butoxycarbonyl)(methyl)amino)-2-methyl-4-(phenylethynyl)-5-(*p*-tolyl)-1H-pyrrole-3-carboxylate (8)**

Colorless oil.  $[\alpha]_D^{25} = -69.5$  ( $c$  0.37,  $\text{CHCl}_3$ );  $^1\text{H NMR}$  (400 MHz,  $\text{CDCl}_3$ )  $\delta$  1.47 (d,  $J = 60.1$ , 9H), 2.43 (d,  $J = 23.3$ , 6H), 2.97 (d,  $J = 48.7$ , 3H), 3.91 (d,  $J = 10.1$ , 3H), 7.26 (q,  $J = 6.4, 7.4$ , 6H), 7.33-7.50 (m, 4H);  $^{13}\text{C NMR}$  (100 MHz,  $\text{CDCl}_3$ )  $\delta$  165.7, 152.0, 141.1, 137.5, 137.3, 133.0, 129.4, 129.0, 128.1, 127.4, 124.9, 110.8, 107.5, 83.4, 51.2, 28.0, 21.3, 10.8. HRMS (ESI) calcd for  $\text{C}_{28}\text{H}_{30}\text{N}_2\text{O}_4$   $m/z$   $[\text{M}+\text{H}]^+$ : 459.2278, found: 459.2282. Enantiomeric excess was found to be 91% by chiral HPLC (ChiralPak IC column, hexane/*i*-PrOH = 96:4, 1 ml/min,  $t_{\text{major}} = 21.5$  min,  $t_{\text{minor}} = 16.5$  min).

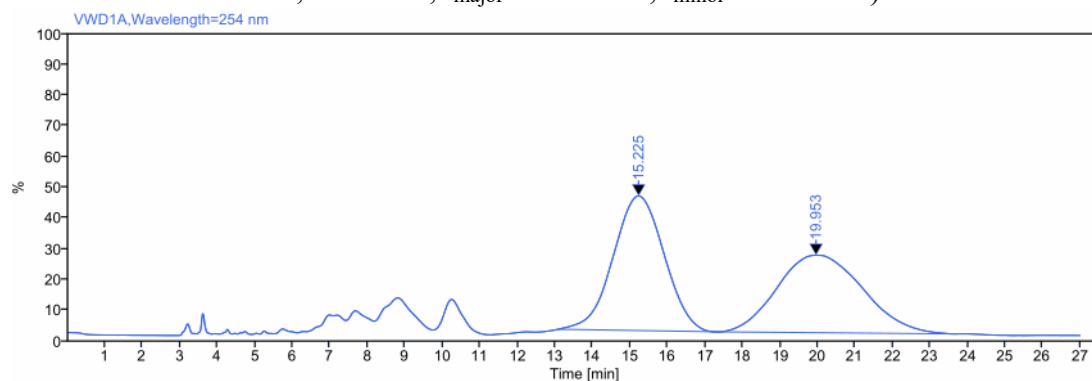

| RT [min] | Type | Width [min] | Area   | Height | Area% |
|----------|------|-------------|--------|--------|-------|
| 15.225   | MM m | 4.34        | 738.34 | 7.84   | 50.81 |
| 19.953   | MM m | 6.30        | 714.70 | 4.51   | 49.19 |

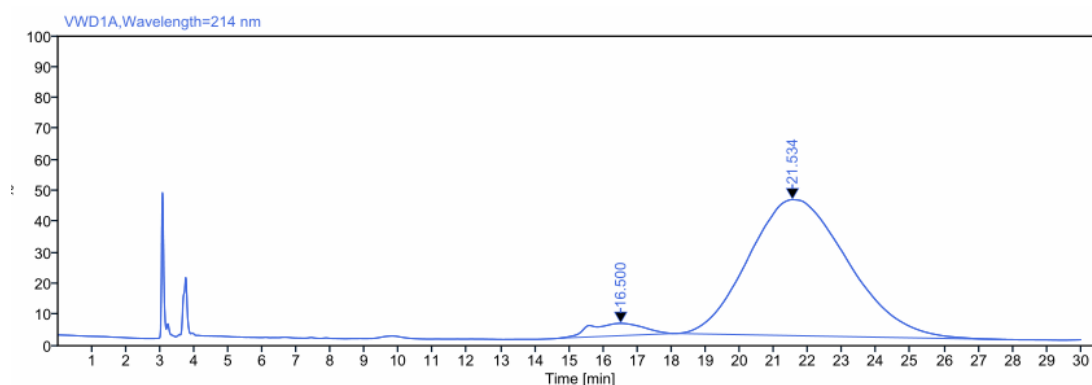

| RT [min] | Type | Width [min] | Area     | Height | Area% |
|----------|------|-------------|----------|--------|-------|
| 16.500   | MM m | 3.36        | 1009.79  | 9.05   | 4.72  |
| 21.534   | BB   | 9.70        | 20379.68 | 100.37 | 95.28 |

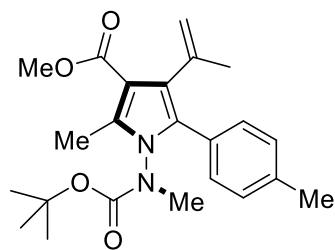

**(R)-methyl 1-((tert-butoxycarbonyl)(methyl)amino)-2-methyl-4-(prop-1-en-2-yl)-5-(p-tolyl)-1H-pyrrole-3-carboxylate (9)**

Colorless oil.  $[\alpha]_D^{25} = -55.2$  ( $c$  0.72,  $\text{CHCl}_3$ );  $^1\text{H NMR}$  (400 MHz,  $\text{CDCl}_3$ )  $\delta$  1.43 (d,  $J = 37.7$ , 9H), 1.95 (s, 3H), 2.37 (d,  $J = 16.7$ , 6H), 2.94 (d,  $J = 43.5$ , 3H), 3.79 (dd,  $J = 2.6$ , 11.0, 3H), 4.67 (d,  $J = 9.6$ , 1H), 4.96 (s, 1H), 7.09-7.22 (m, 4H);  $^{13}\text{C NMR}$  (100 MHz,  $\text{CDCl}_3$ )  $\delta$  154.2, 139.7, 137.9, 137.7, 135.7, 130.3, 130.1, 129.0, 128.8, 127.8, 127.8, 115.9, 115.8, 82.3, 51.0, 50.9, 38.8, 37.7, 28.2, 25.0, 24.9, 21.5, 21.5, 10.9, 10.9. HRMS (ESI) calcd for  $\text{C}_{23}\text{H}_{31}\text{N}_2\text{O}_4$   $m/z$   $[\text{M}+\text{H}]^+$ : 399.2278, found: 399.2283. Enantiomeric excess was found to be 90% by chiral HPLC (ChiralPak IC column, hexane/*i*-PrOH = 99:1, 1 ml/min,  $t_{\text{major}} = 18.4$  min,  $t_{\text{minor}} = 25.0$  min).

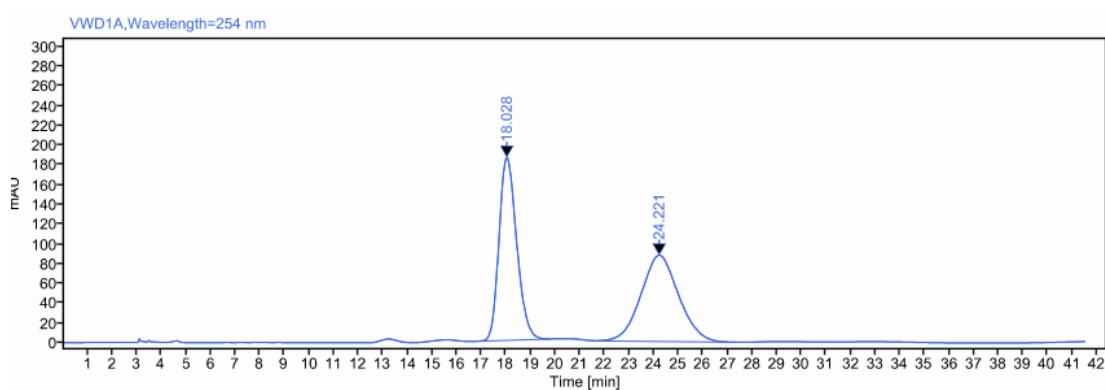

| RT [min] | Type | Width [min] | Area    | Height | Area% |
|----------|------|-------------|---------|--------|-------|
| 18.028   | BB   | 3.11        | 9212.05 | 185.14 | 49.76 |
| 24.221   | BB   | 5.67        | 9302.04 | 87.37  | 50.24 |

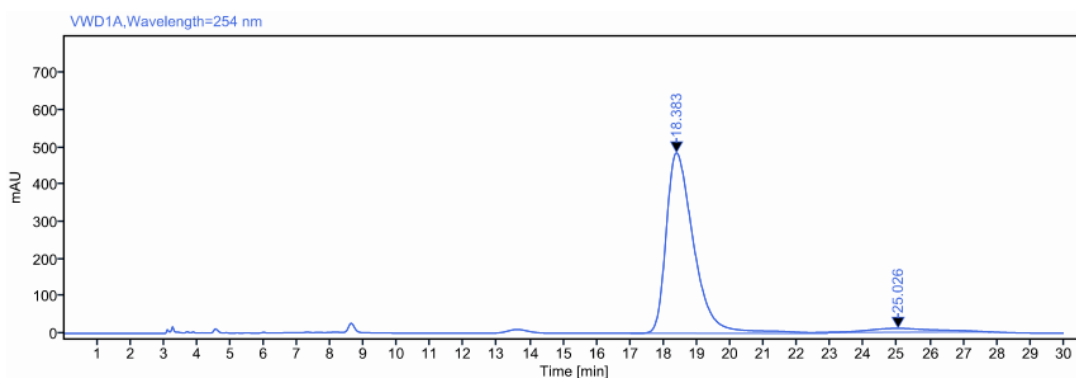

| RT [min] | Type | Width [min] | Area     | Height | Area% |
|----------|------|-------------|----------|--------|-------|
| 18.383   | BM m | 5.91        | 27922.78 | 484.49 | 95.00 |
| 25.026   | MM m | 4.90        | 1468.15  | 10.18  | 5.00  |

## (J) References

- [1] Matheson, C. J.; Casalvieri, K. A.; Backos, D. S.; et al. Development of Potent Pyrazolopyrimidinone-Based WEE1 Inhibitors with Limited Single-Agent Cytotoxicity for Cancer Therapy. *ChemMedChem*, **2018**, *13*, 1681–1694.
- [2] Strick, B. F.; Mundal, D. A.; Thomson, R. J. An oxidative [2, 3]-sigmatropic rearrangement of allylic hydrazides. *J. Am. Chem. Soc.* **2011**, *133*, 14252–14255.
- [3] Wei, Y.; Sun, F.; Li, G.; et al. Enantioselective synthesis of N–N amide–pyrrole atropisomers via Paal–Knorr reaction. *Org. Lett.* **2023**, *26*, 2343–2348.
- [4] Lin, J. S.; Li, T. T.; Liu, J. R.; et al. Cu/chiral phosphoric acid-catalyzed asymmetric three-component radical-initiated 1, 2-dicarbofunctionalization of alkenes. *J. Am. Chem. Soc.* **2018**, *141*, 1074–1083.



# (K) NMR Spectra

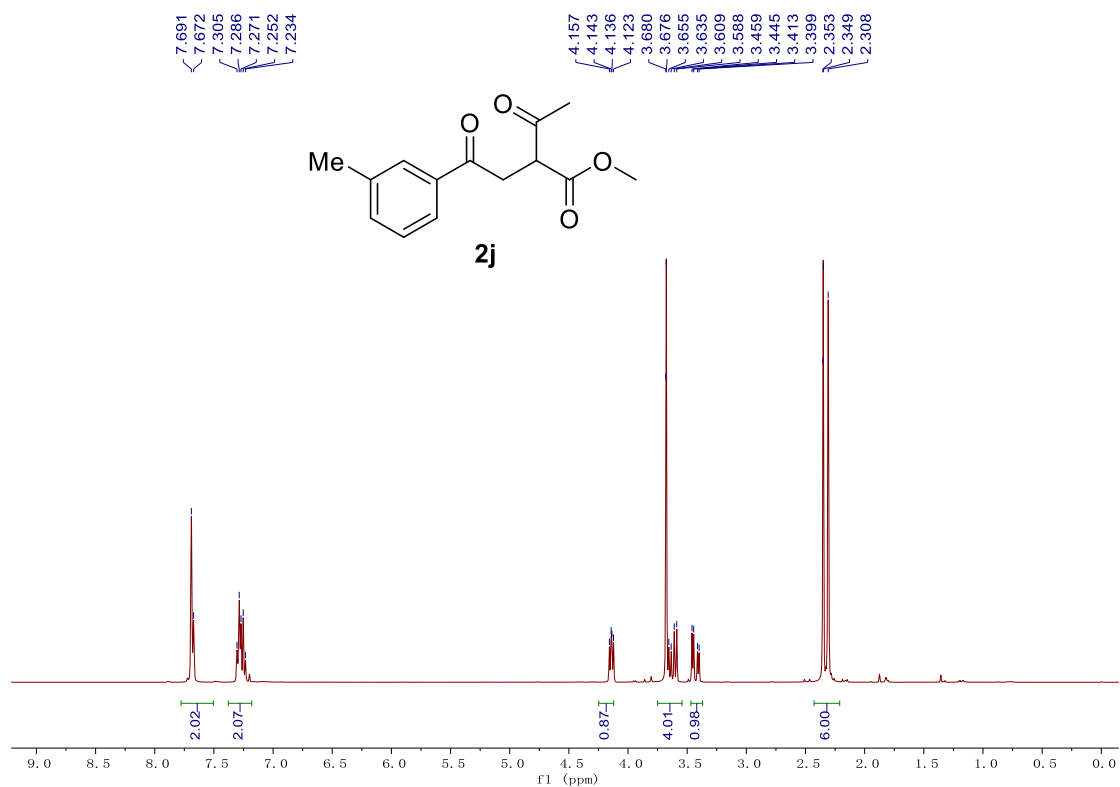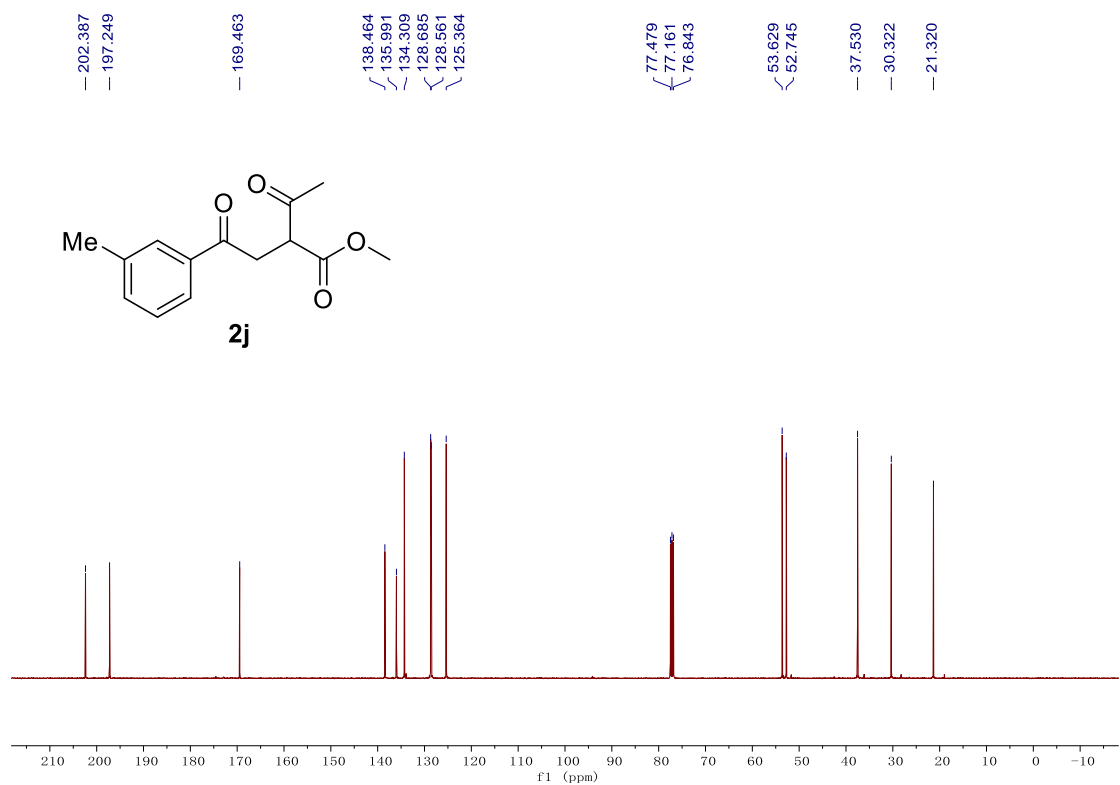

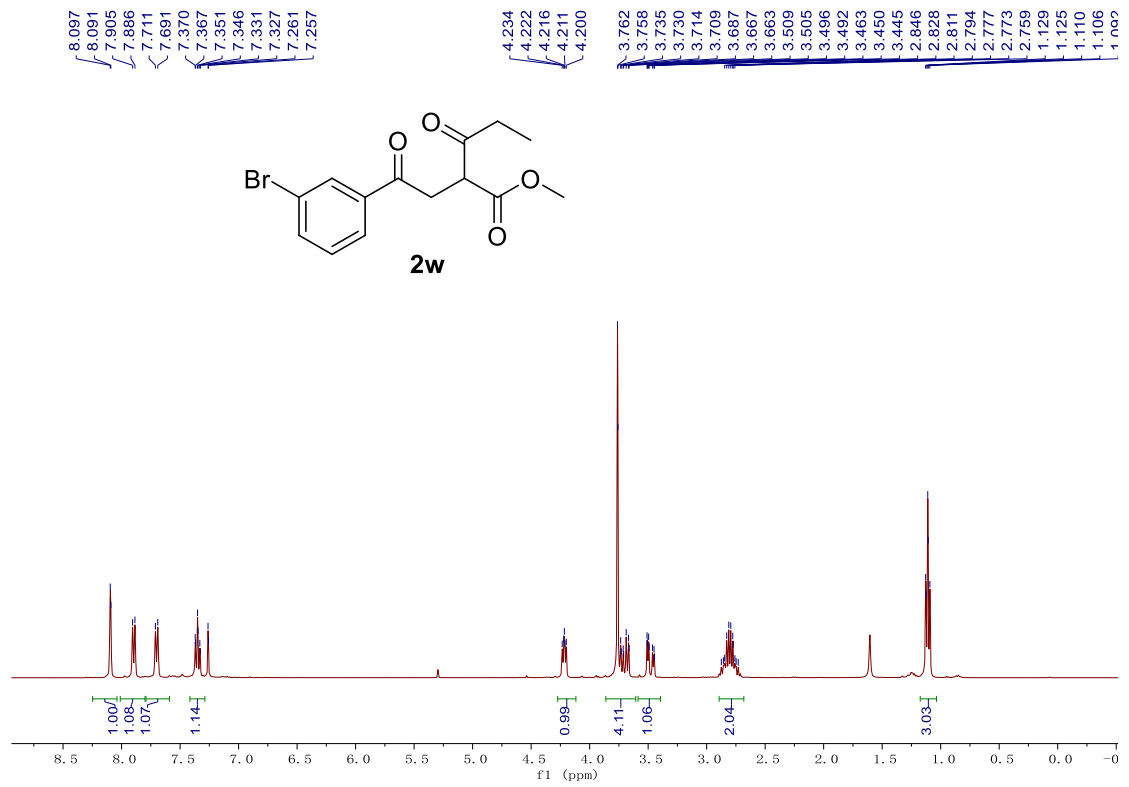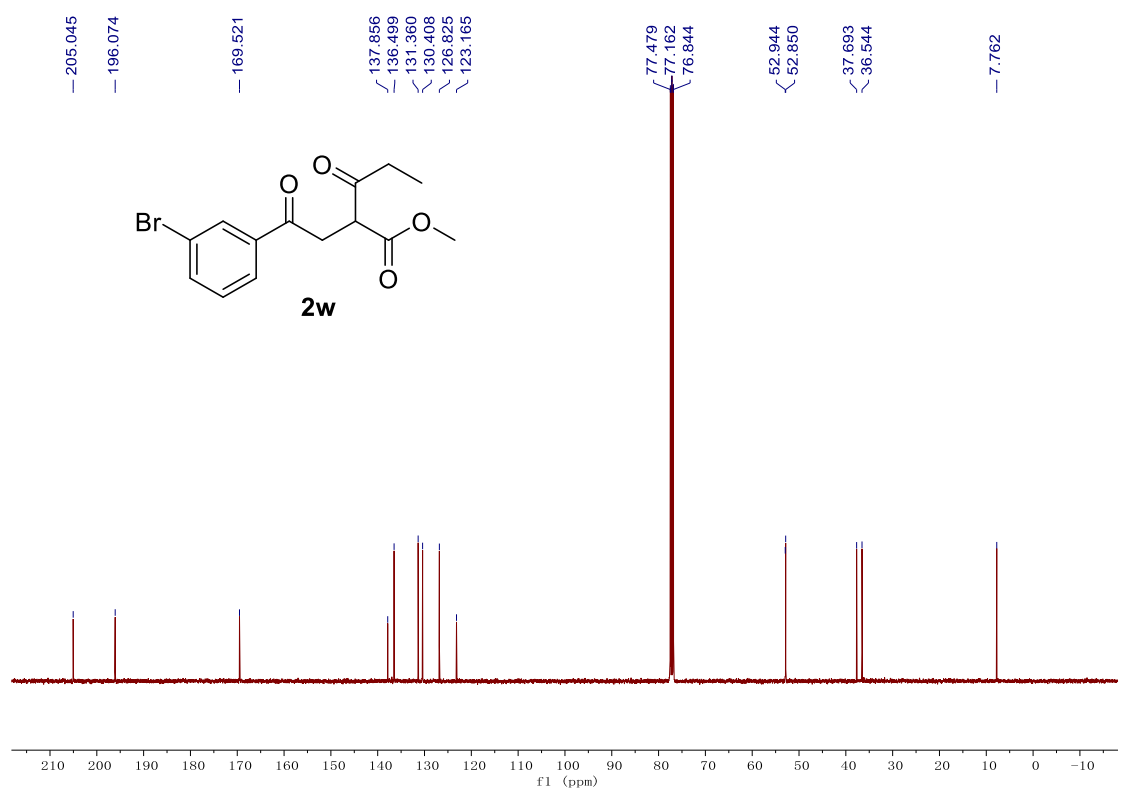

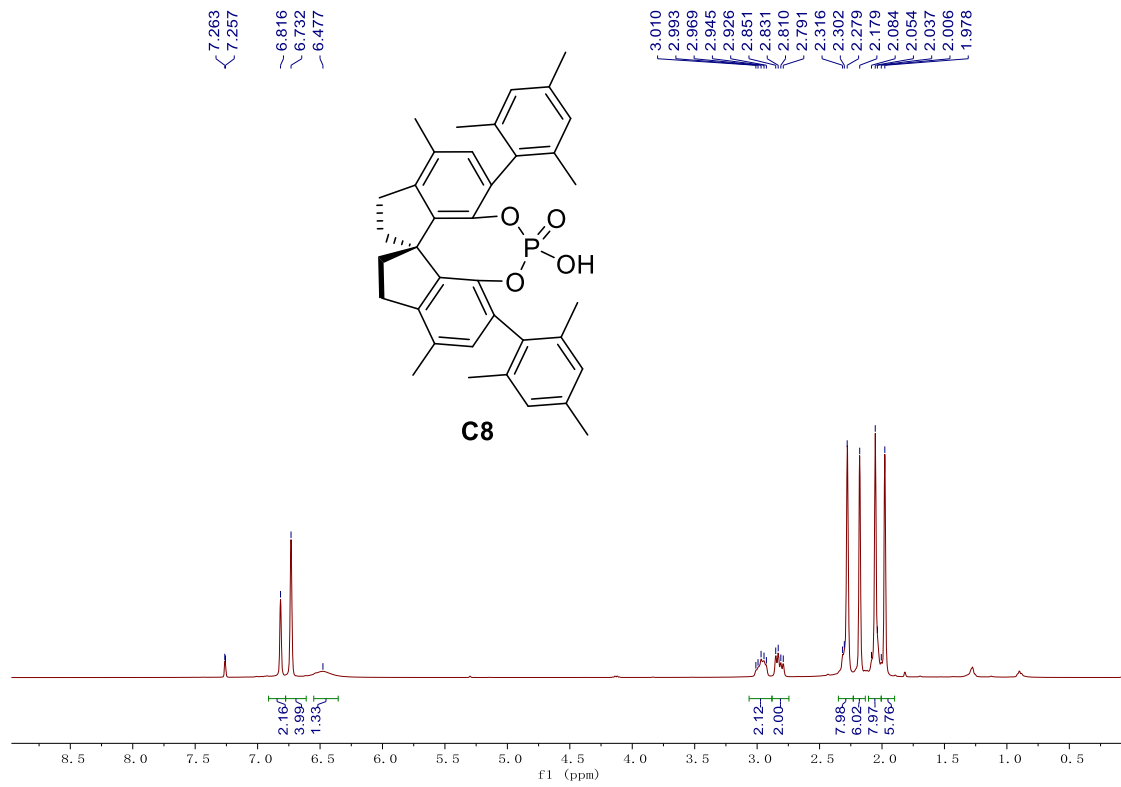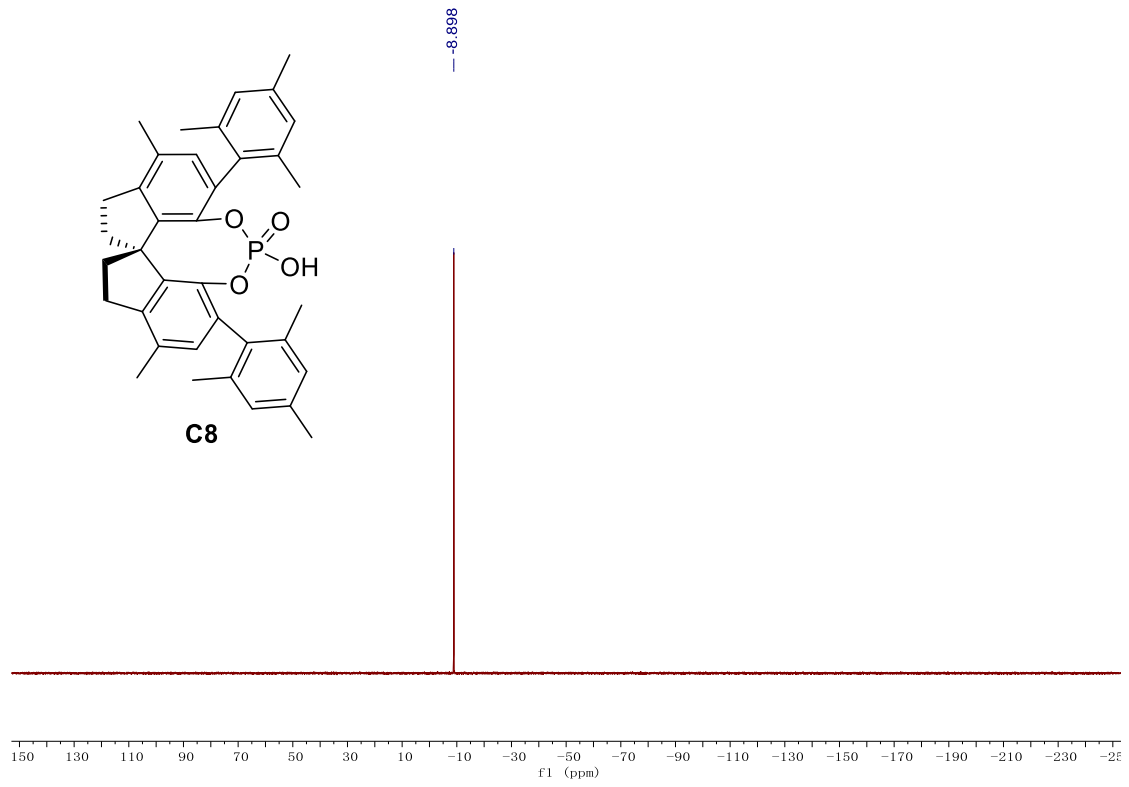

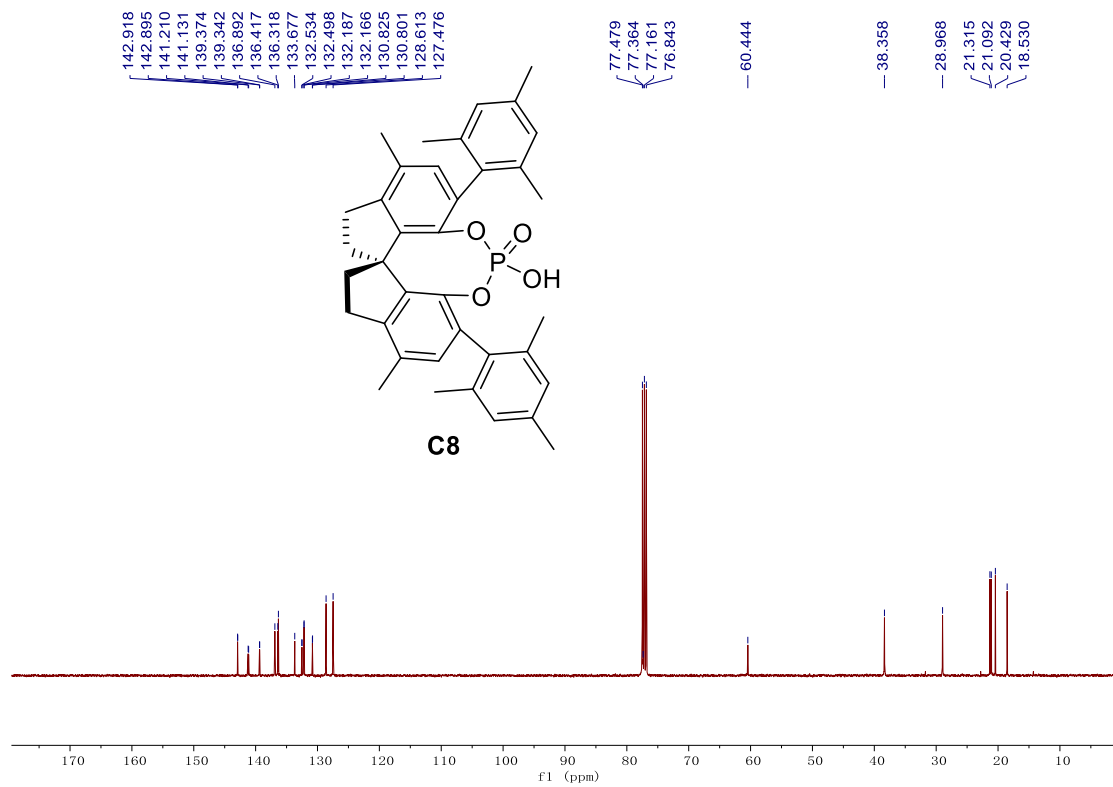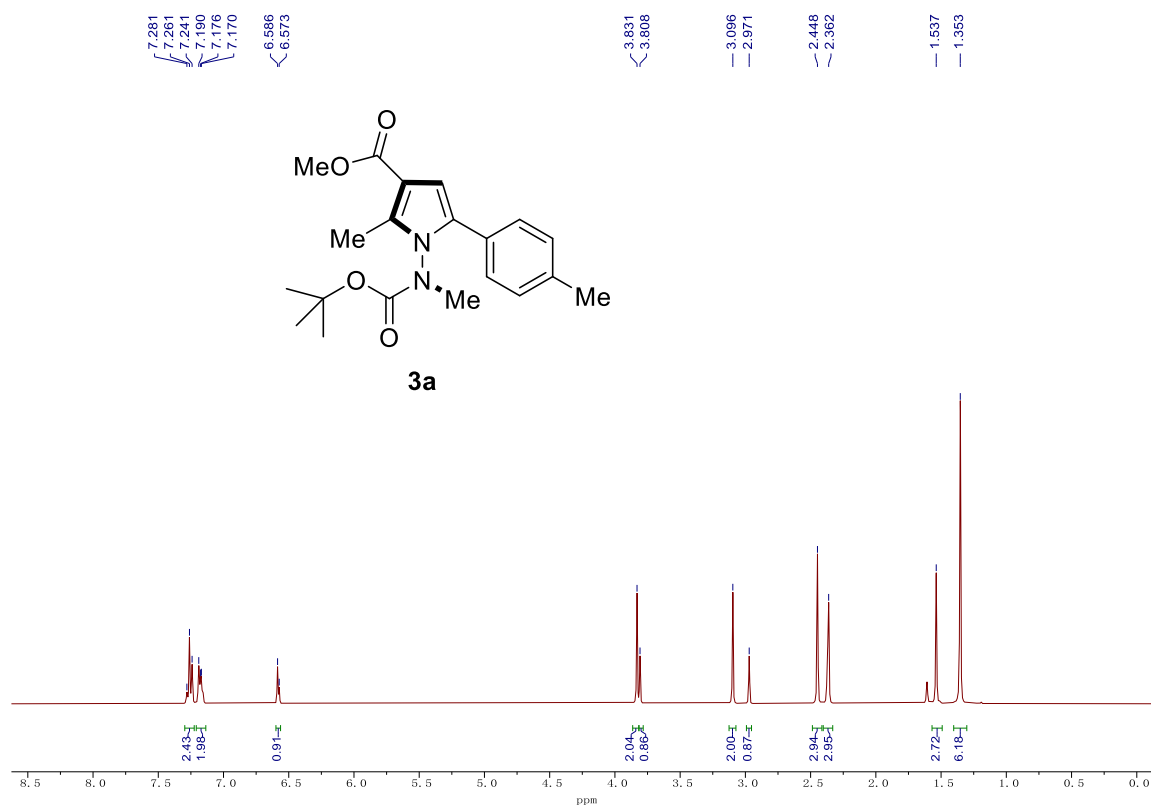

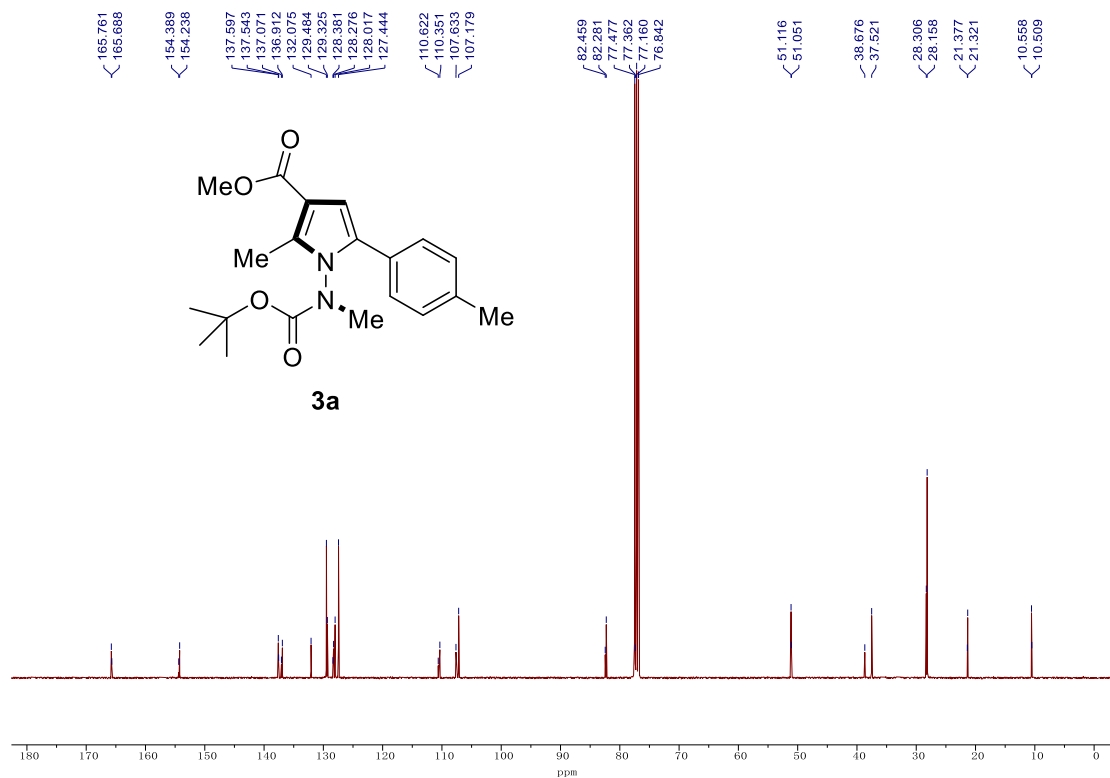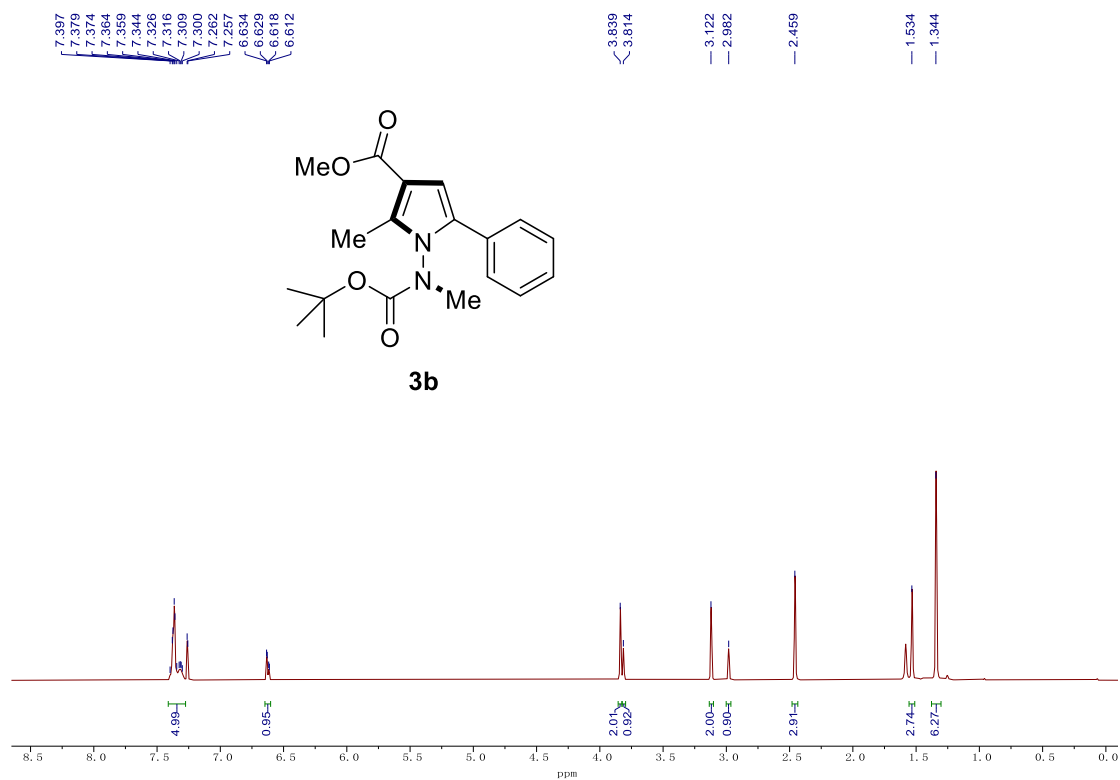

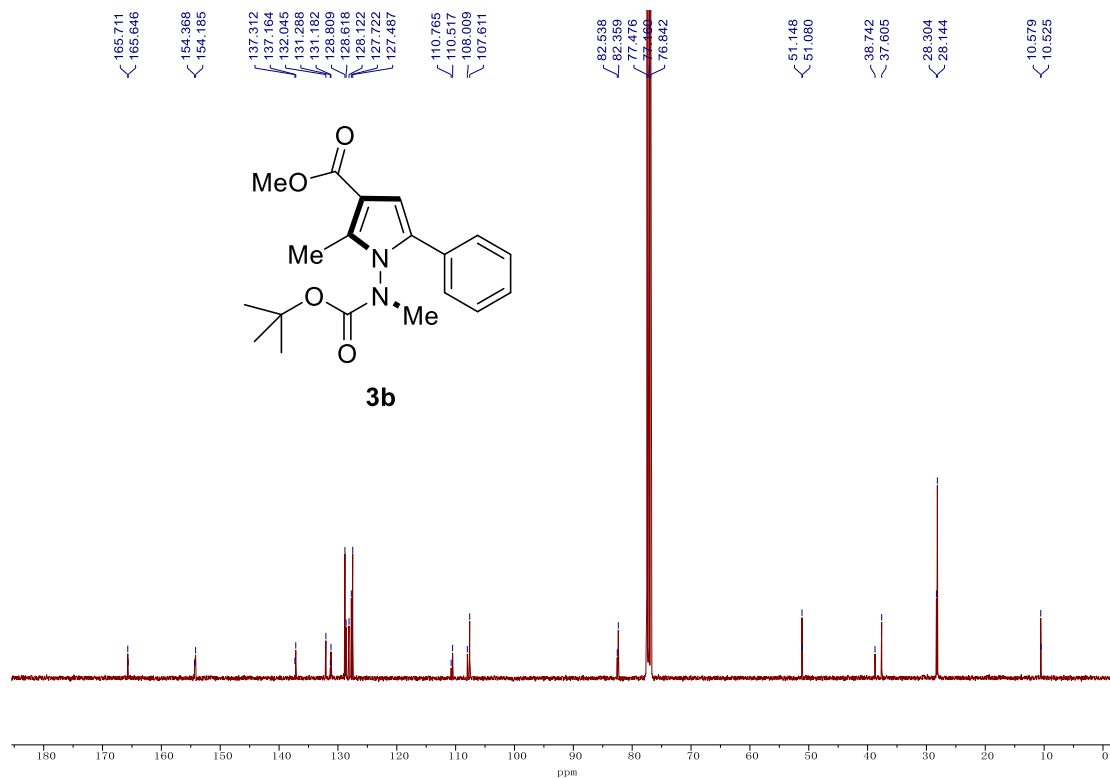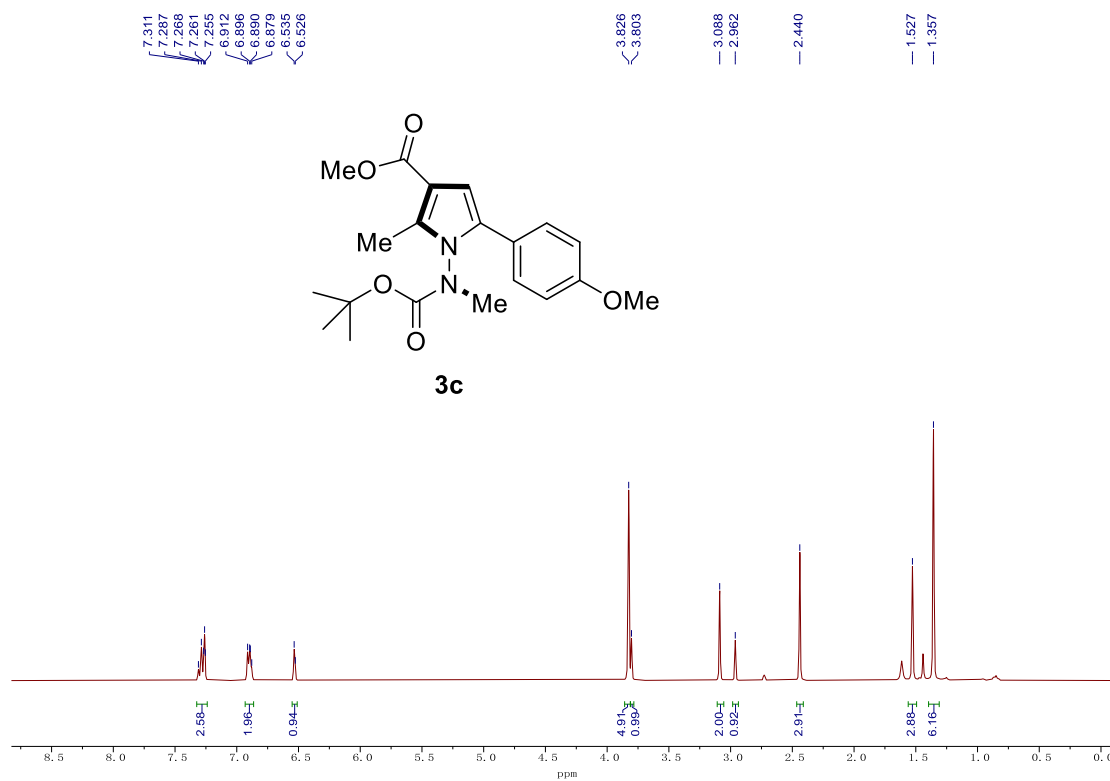

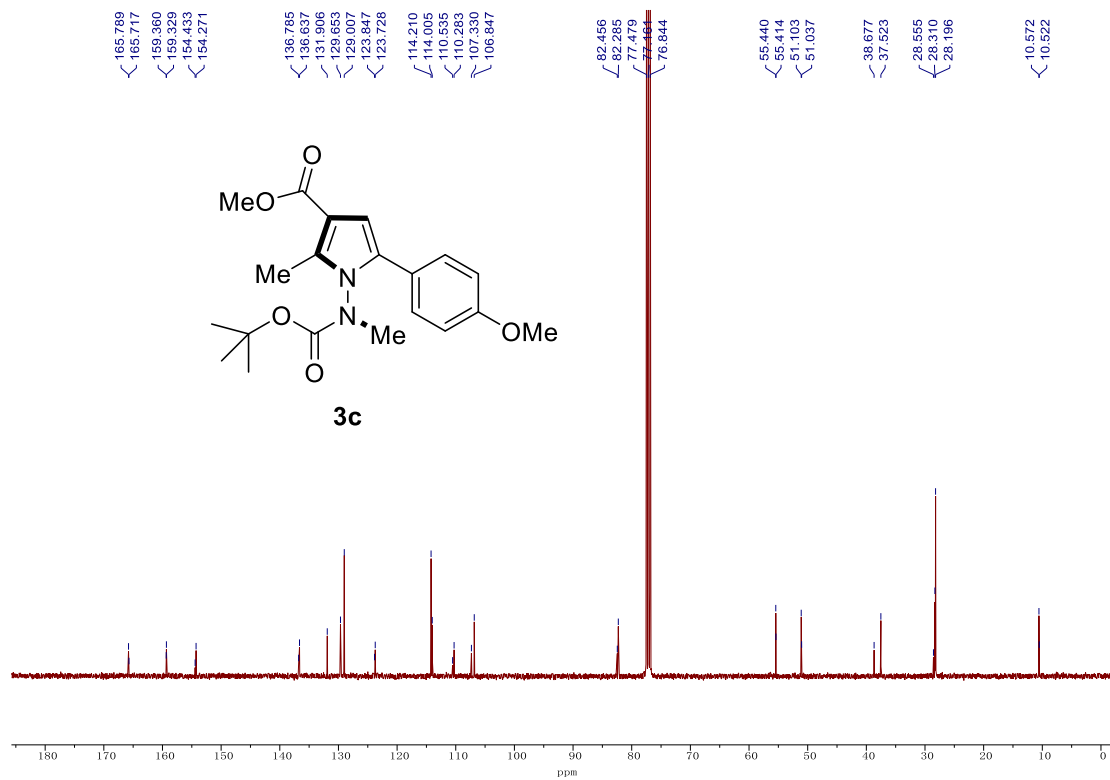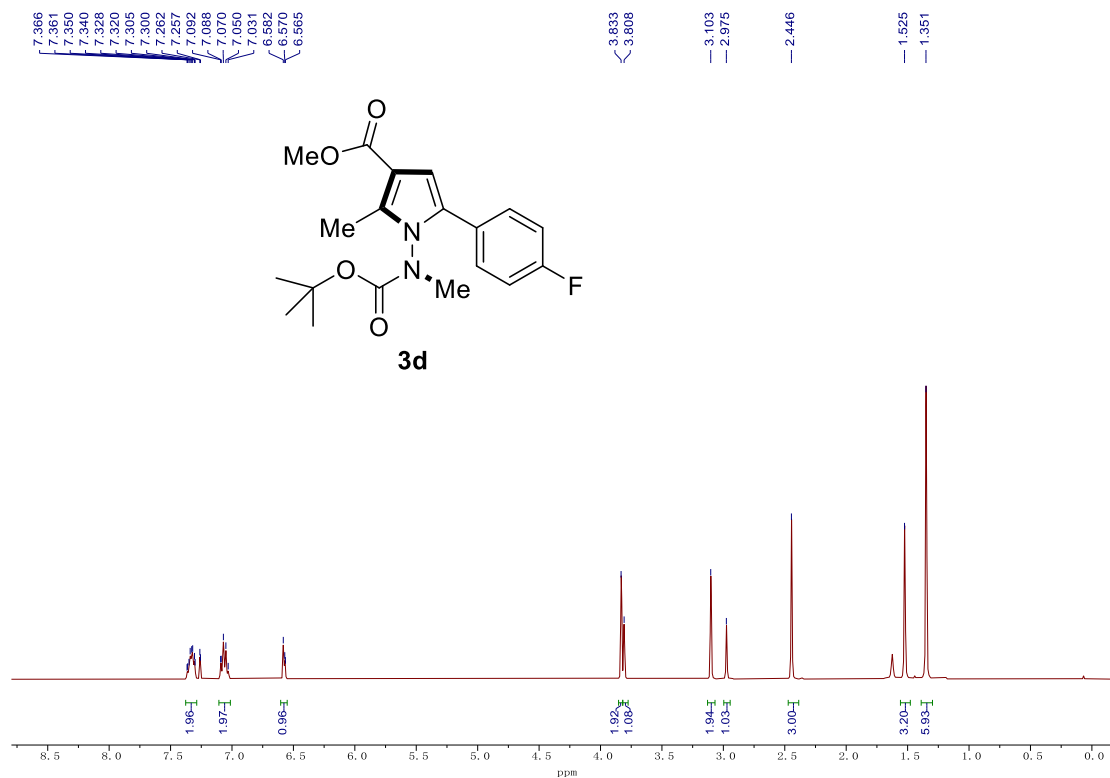

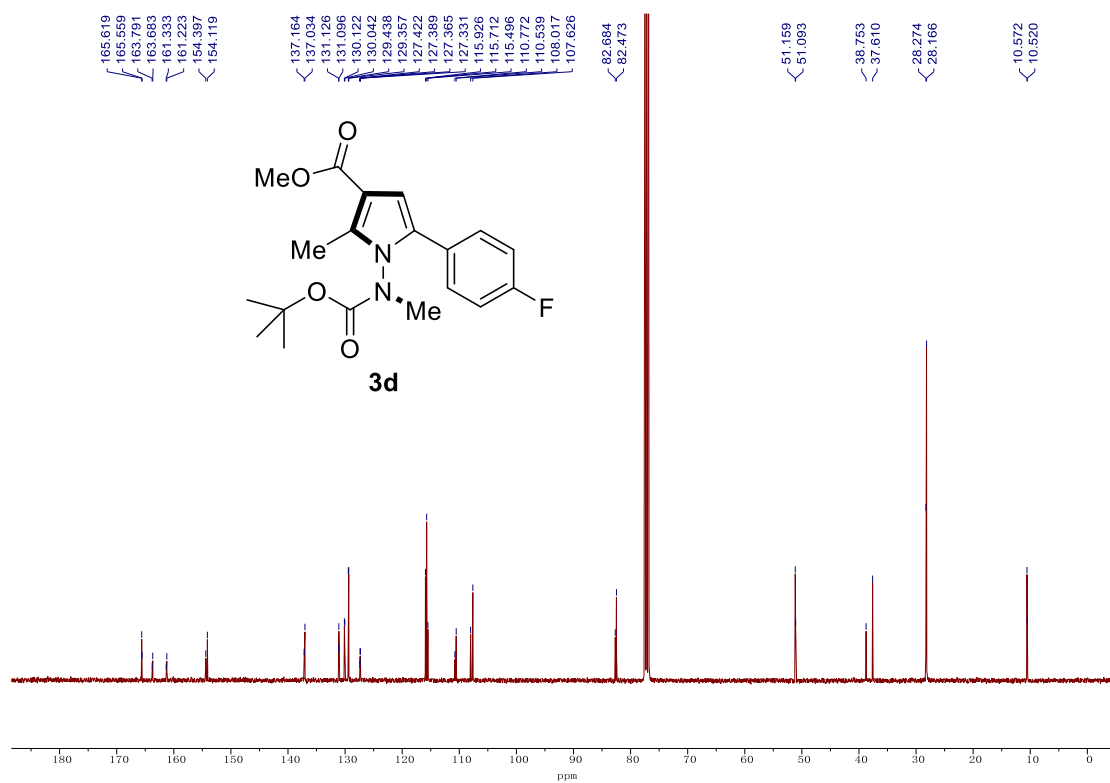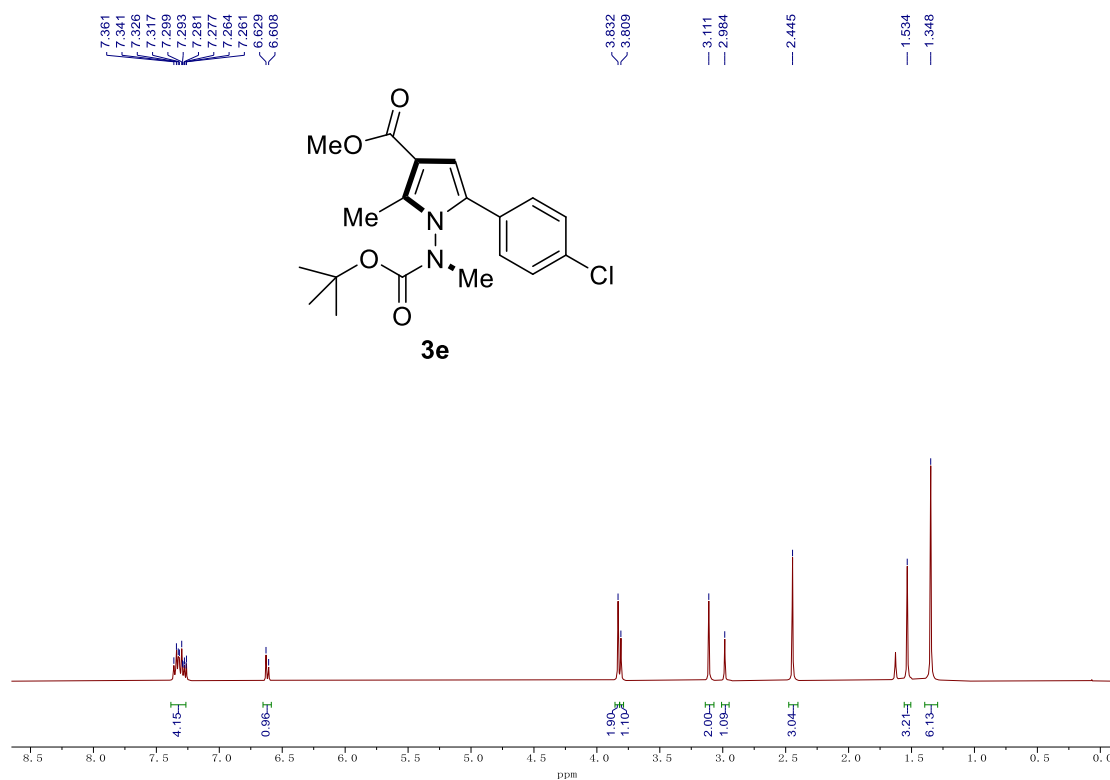



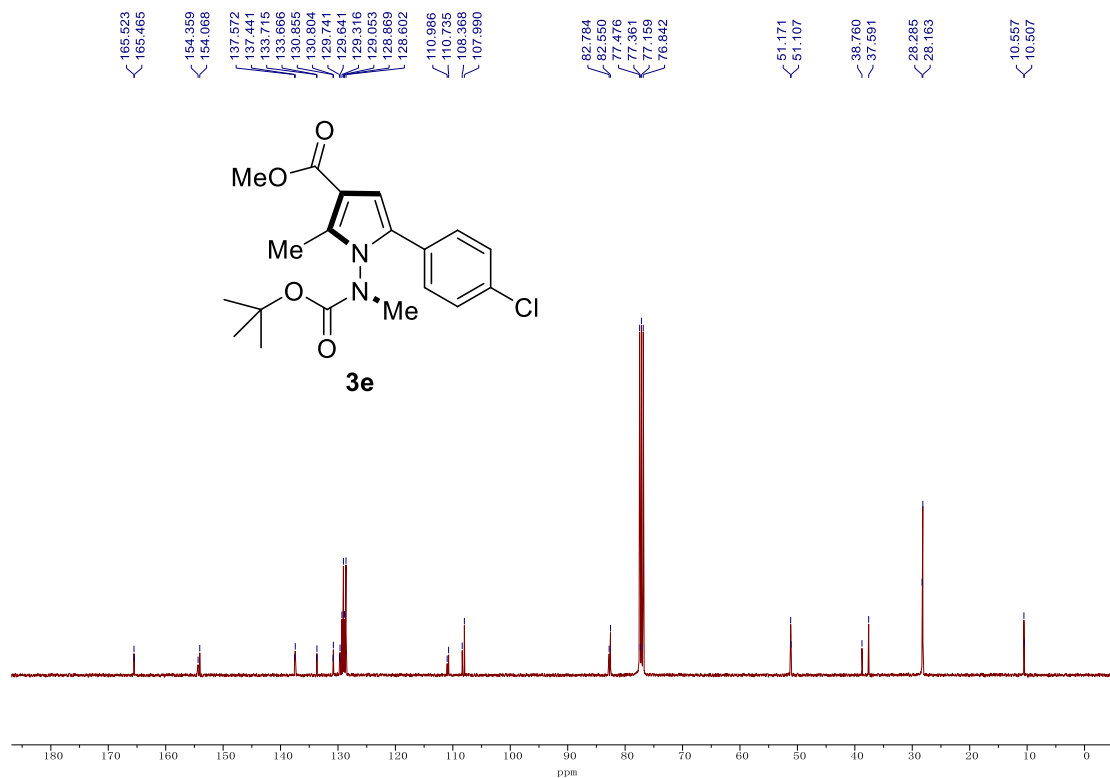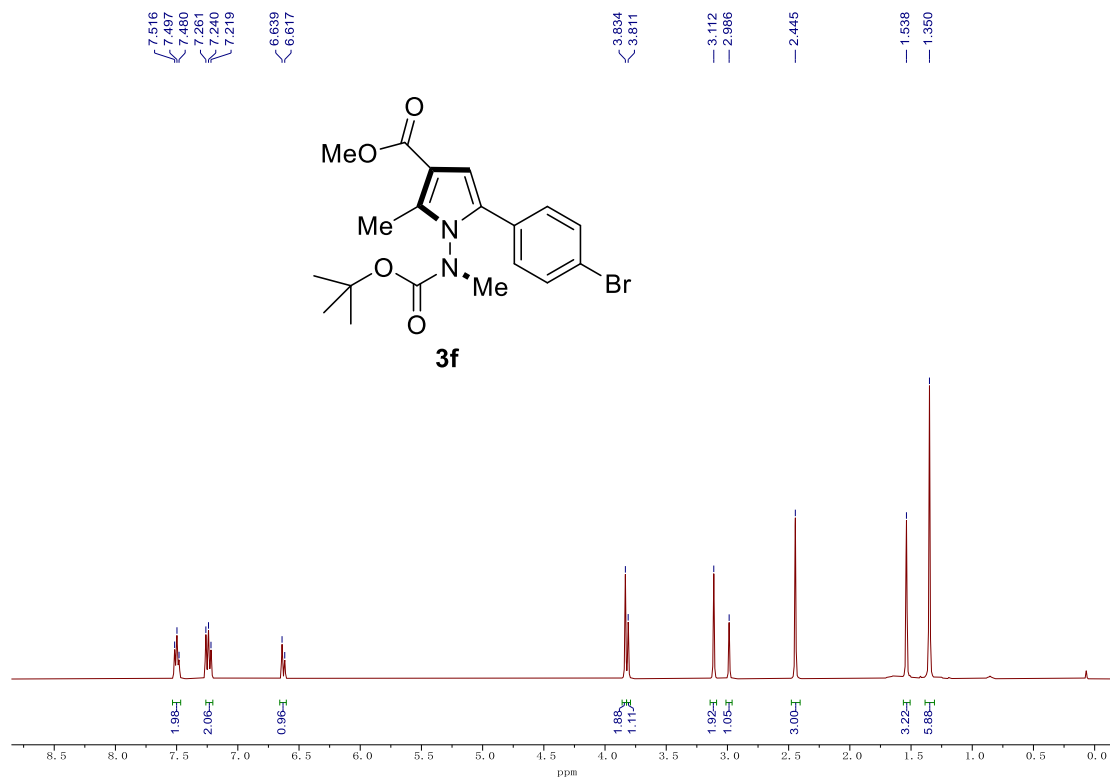

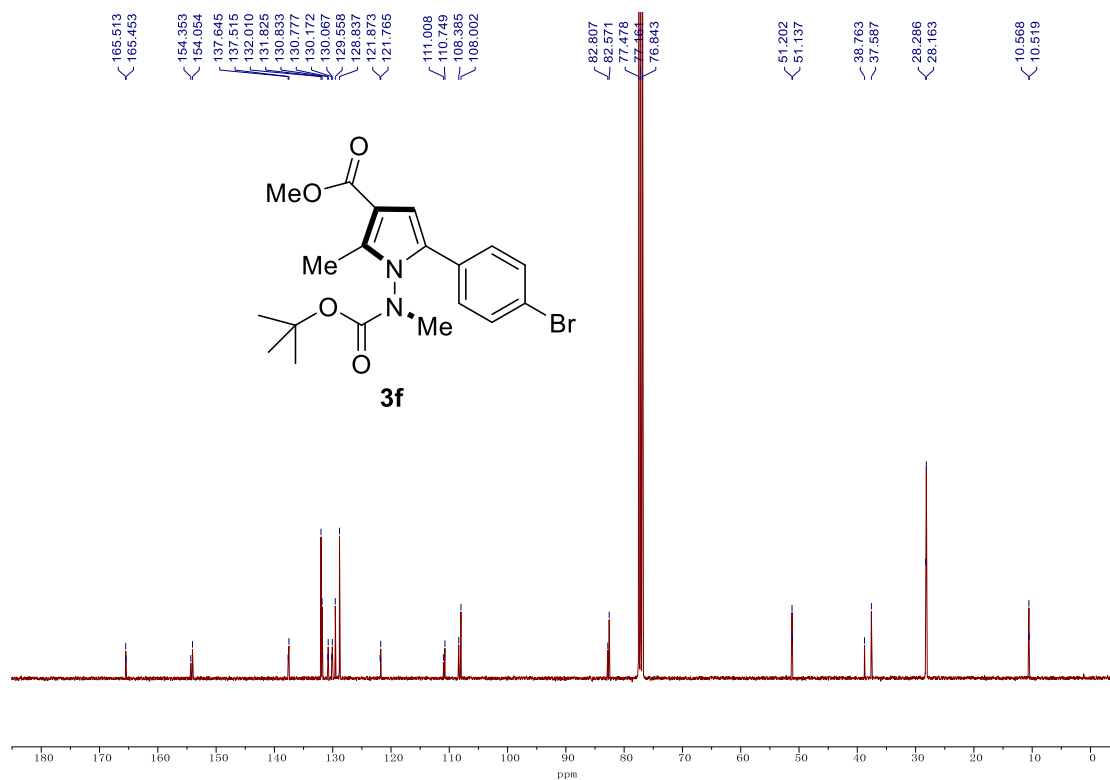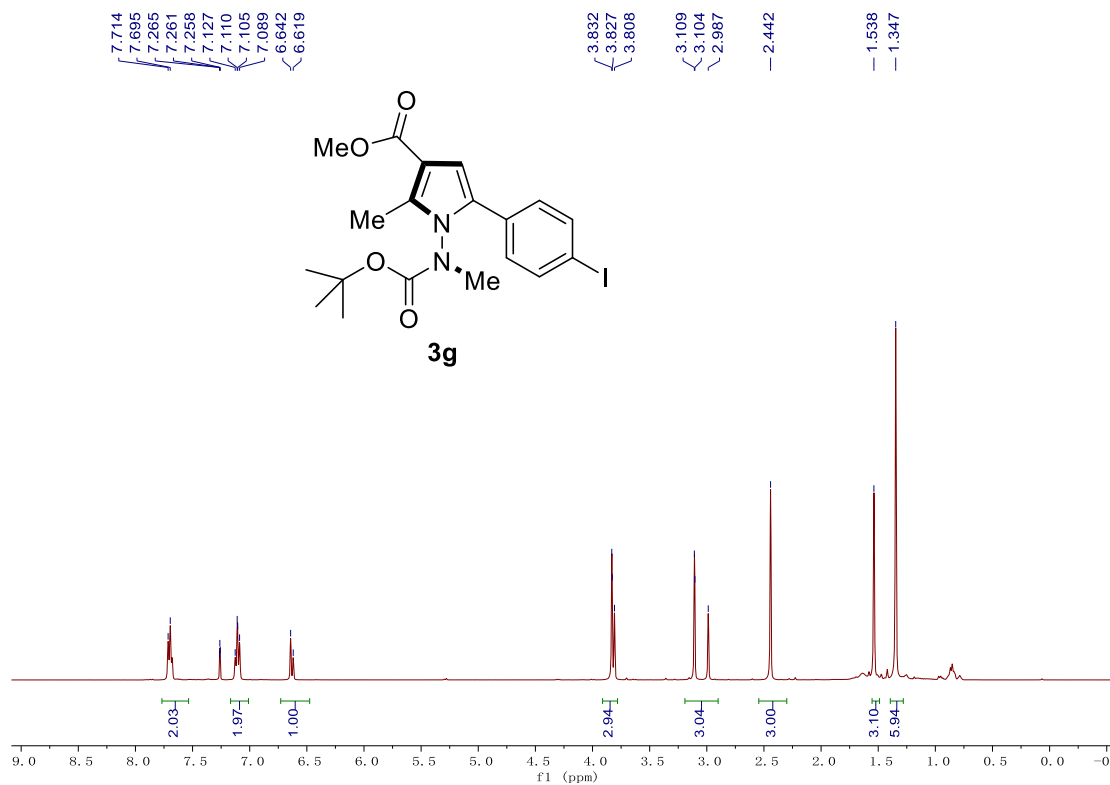

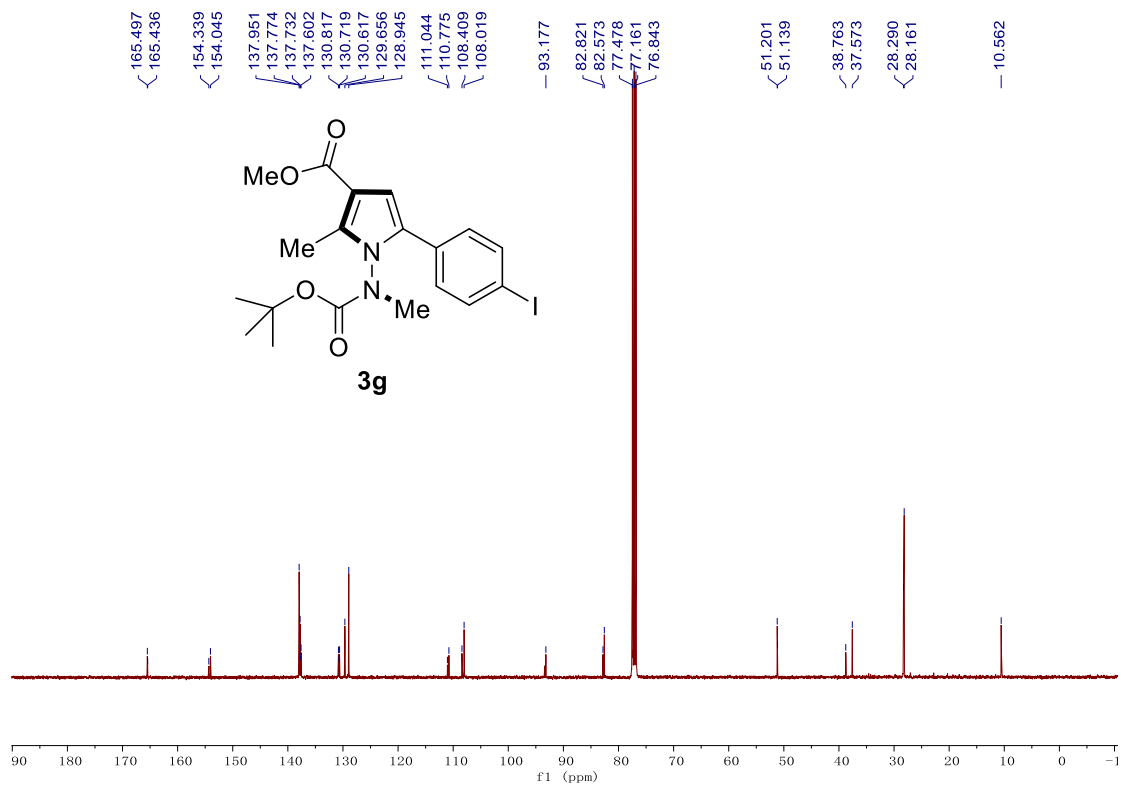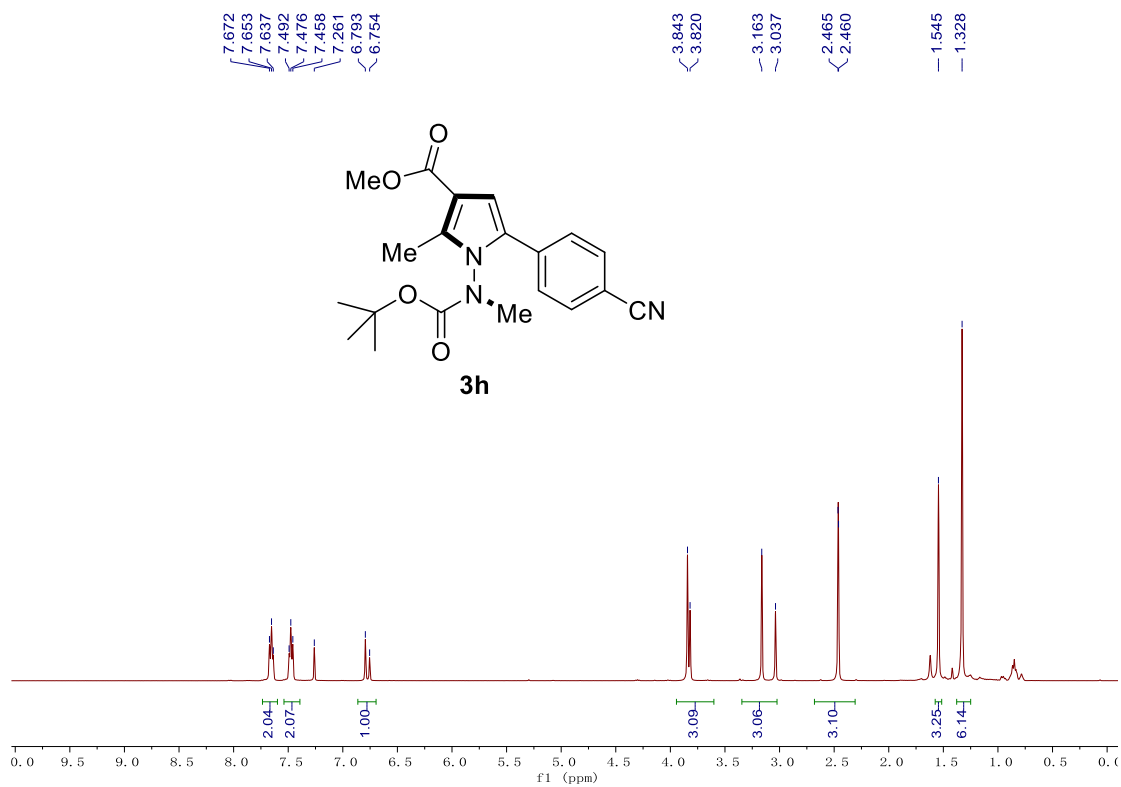

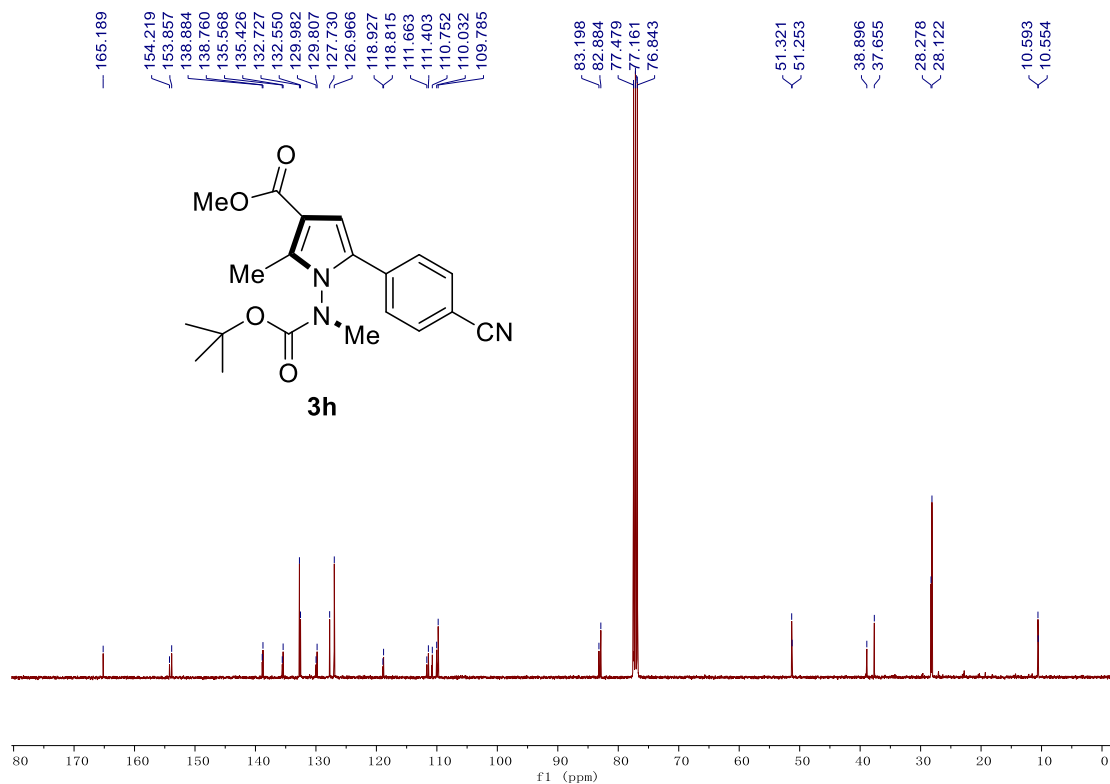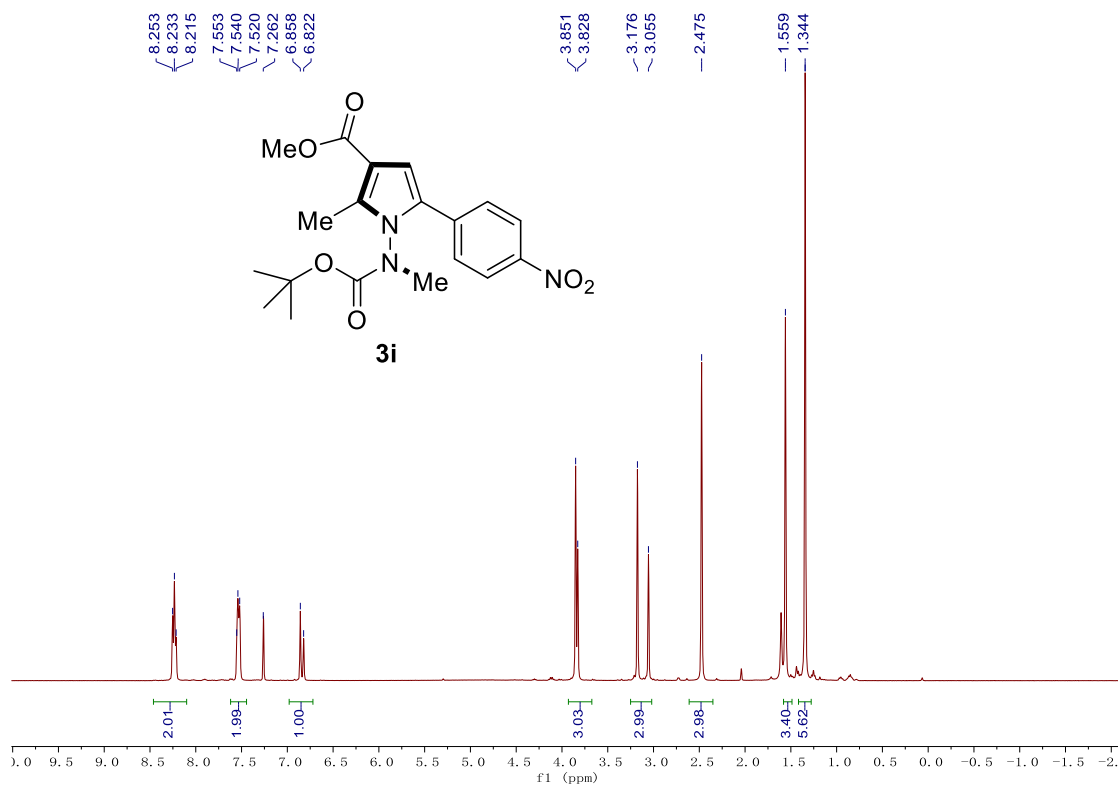



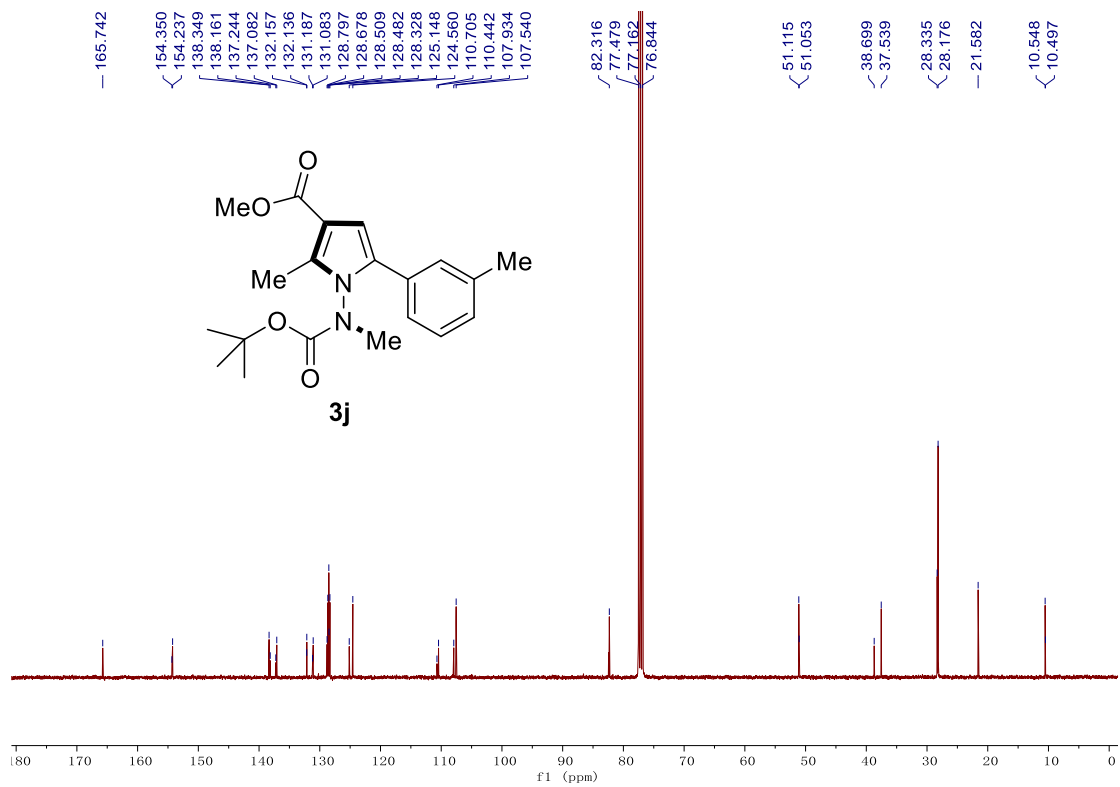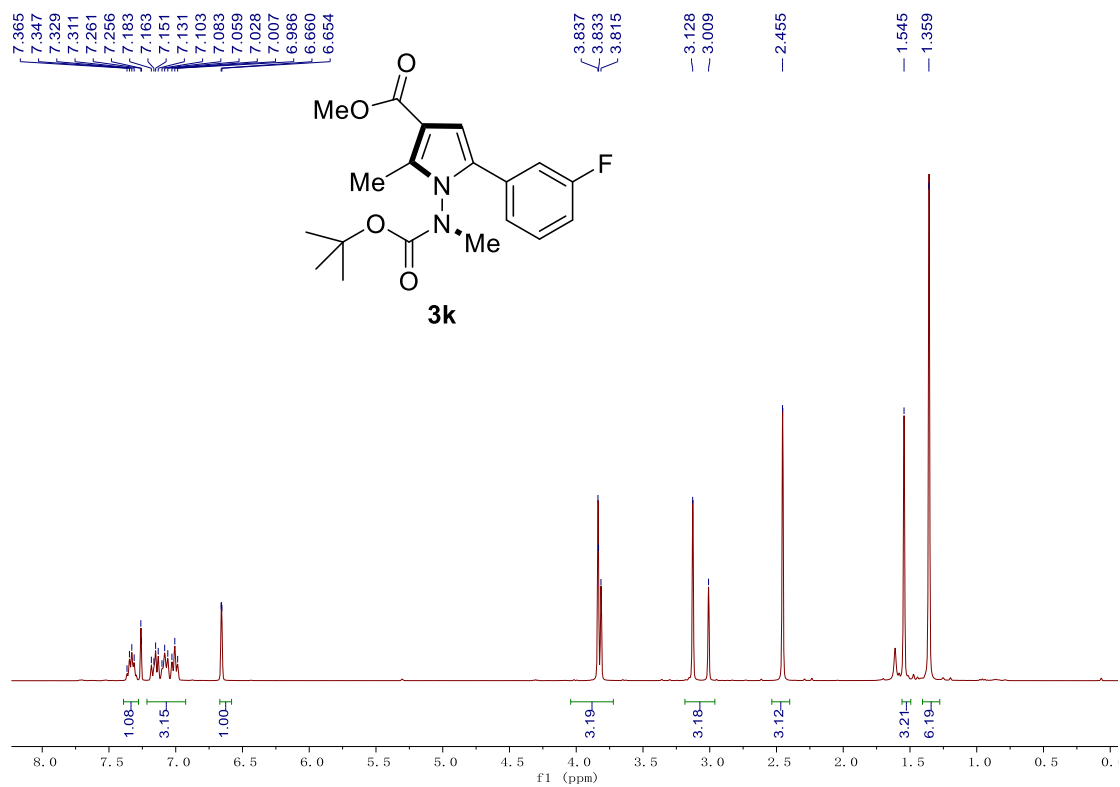

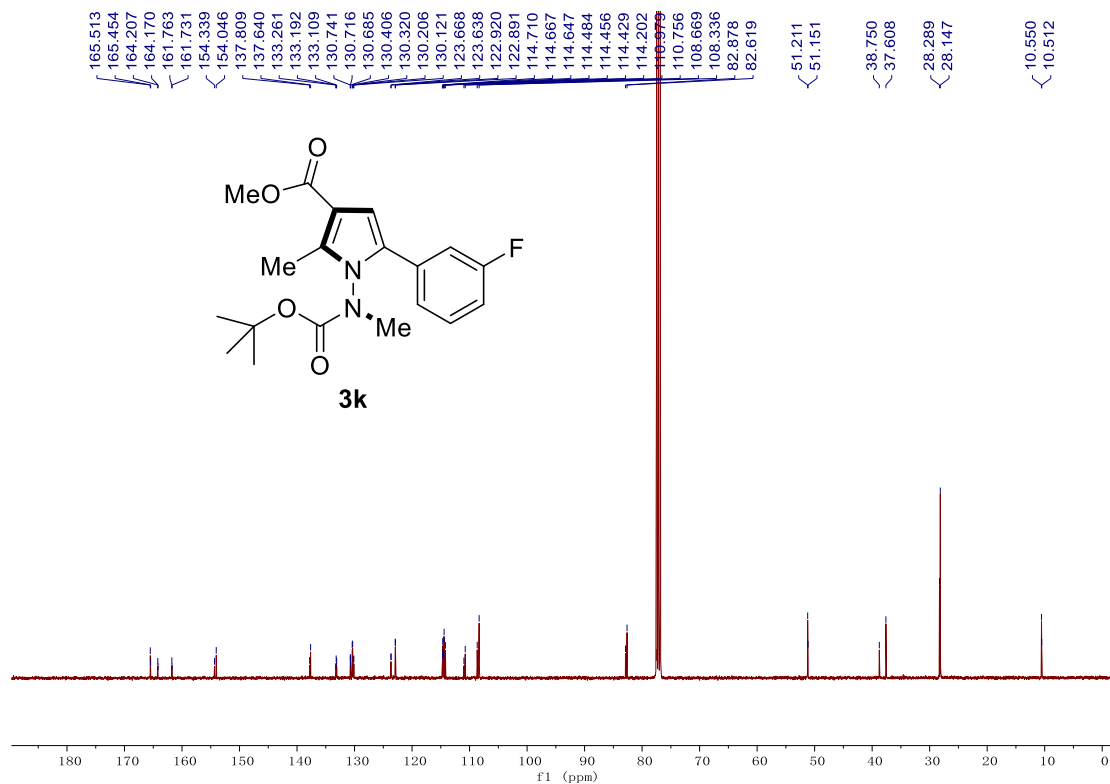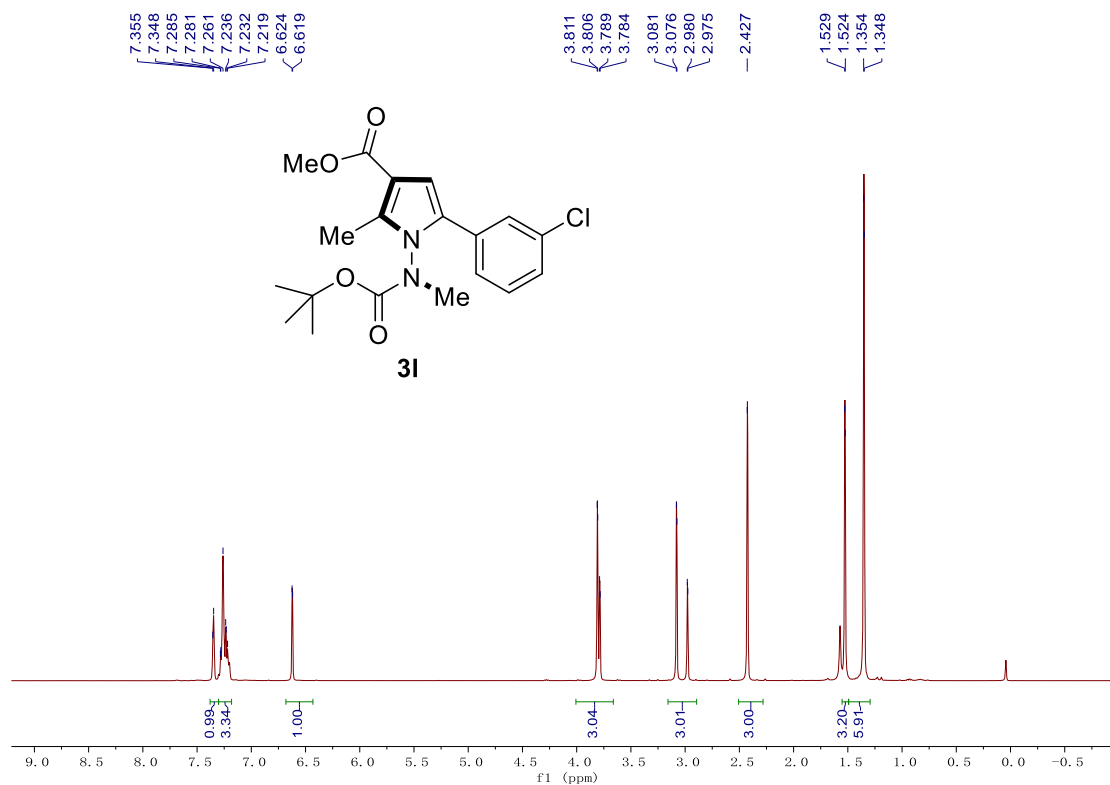

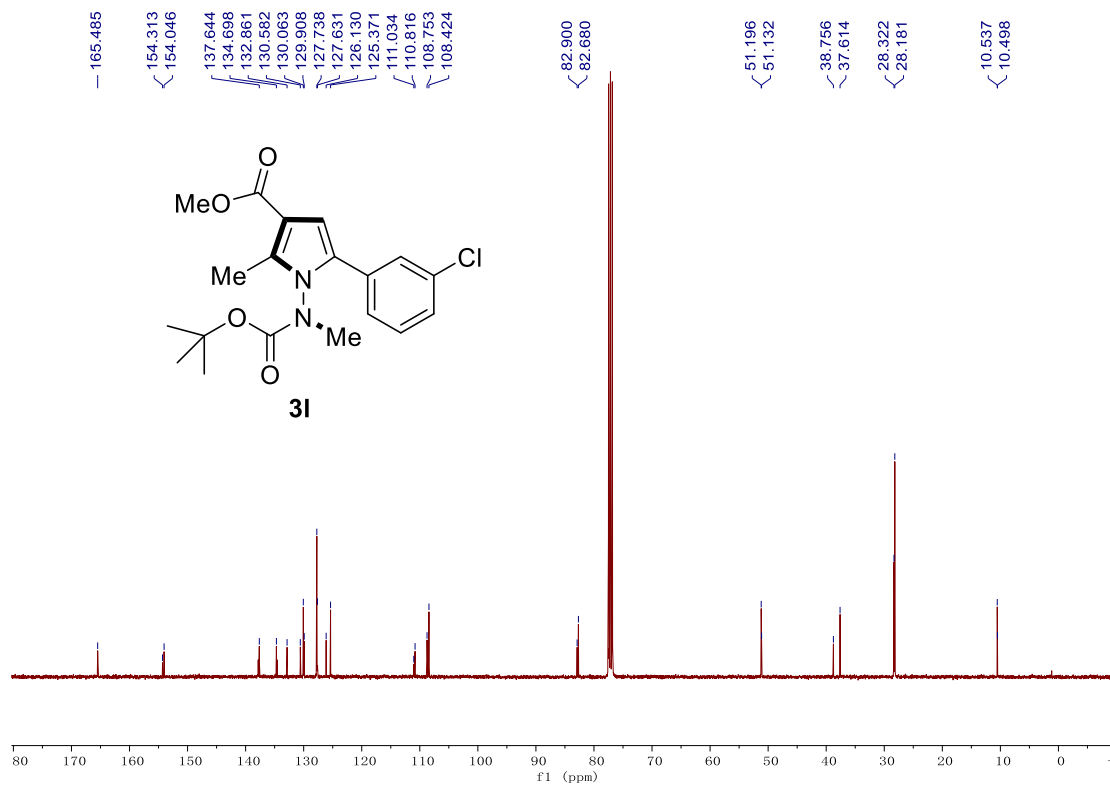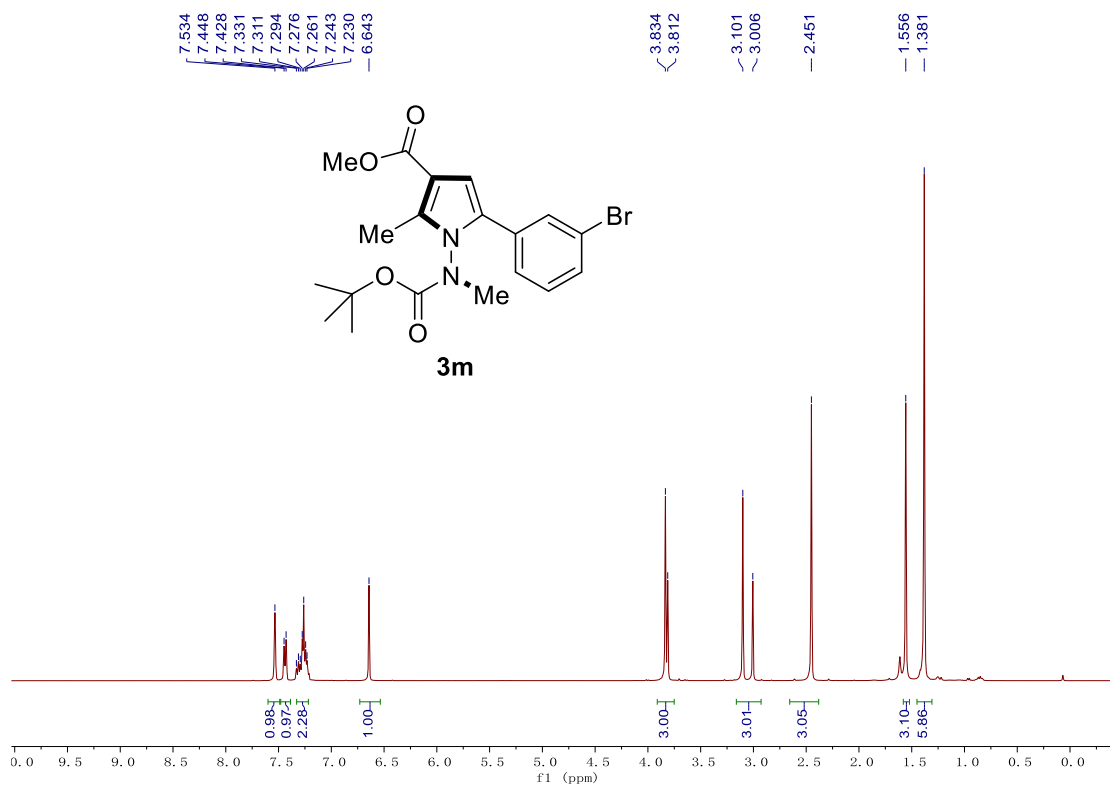



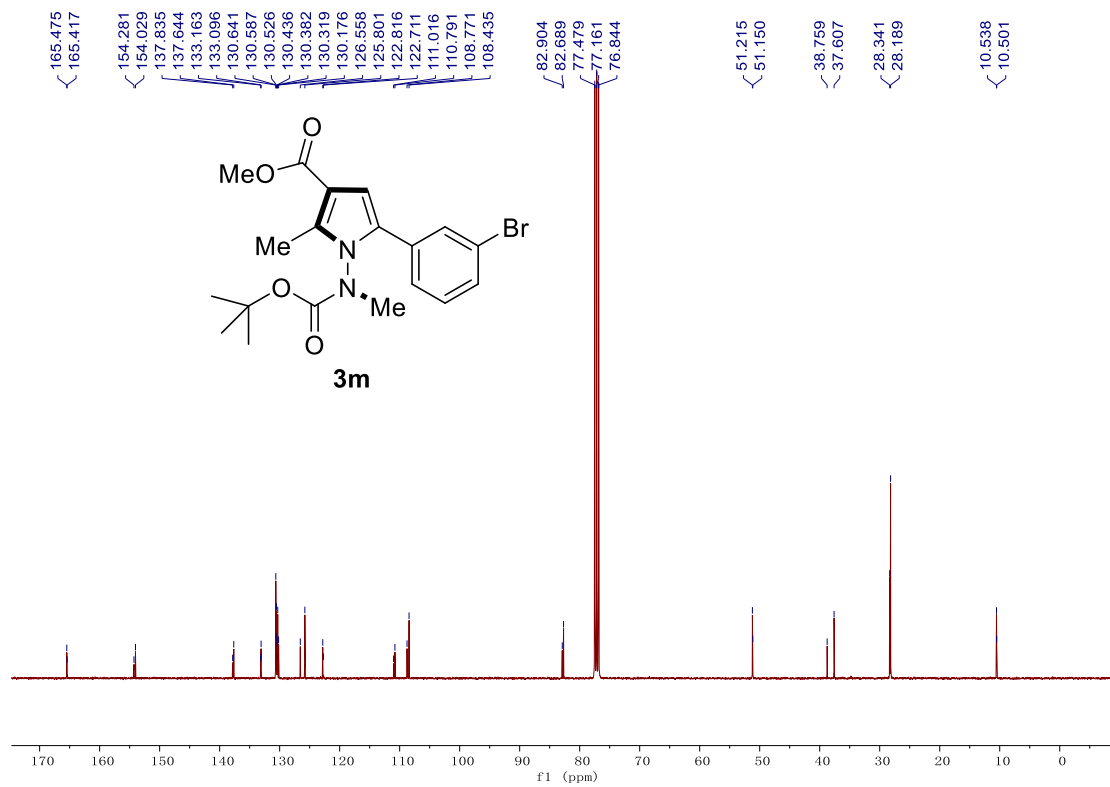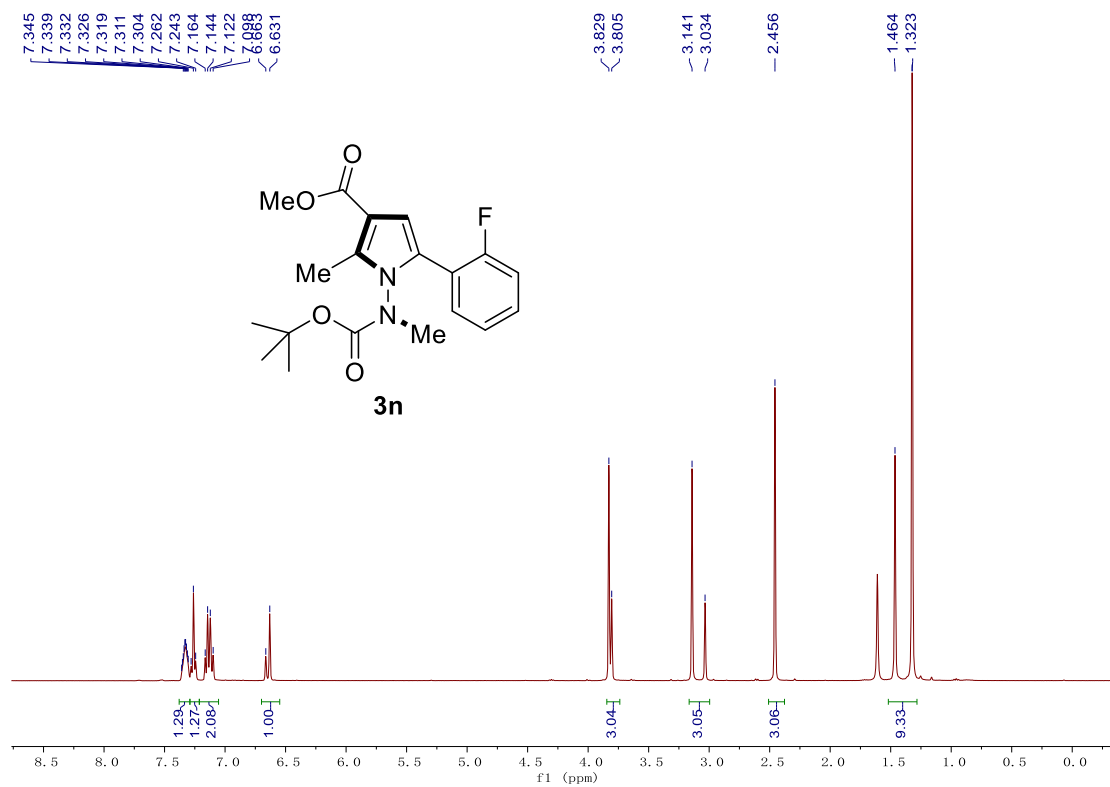

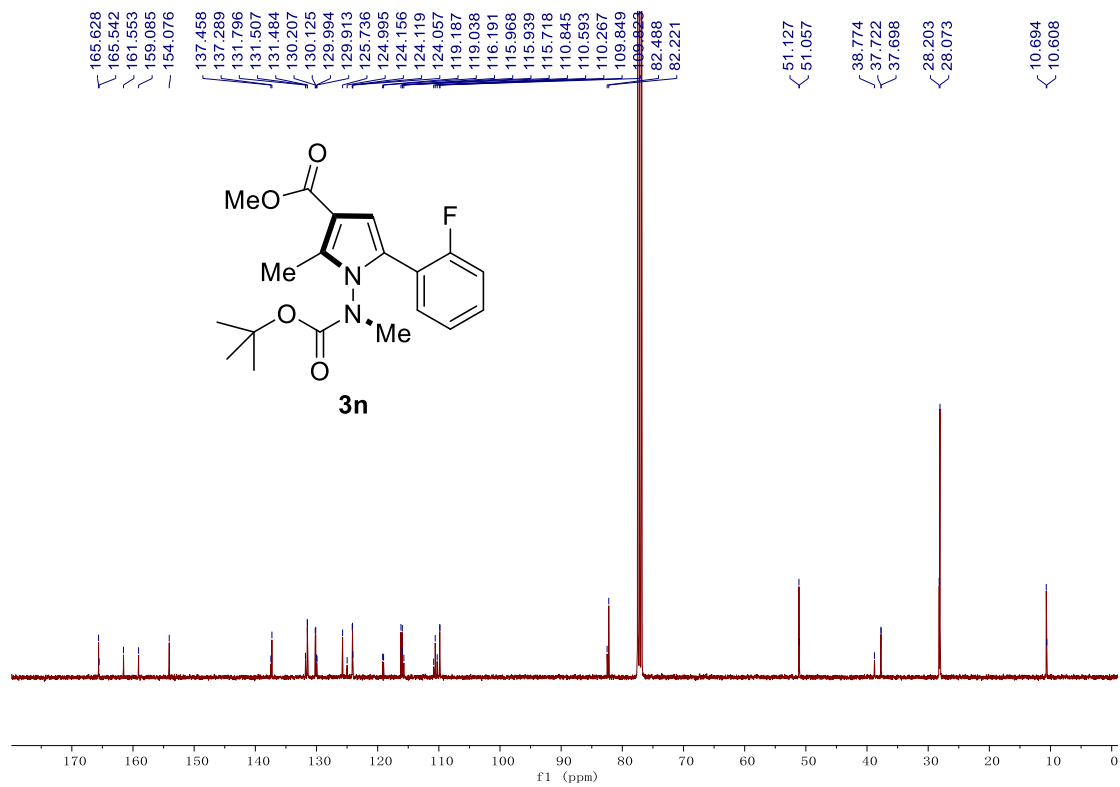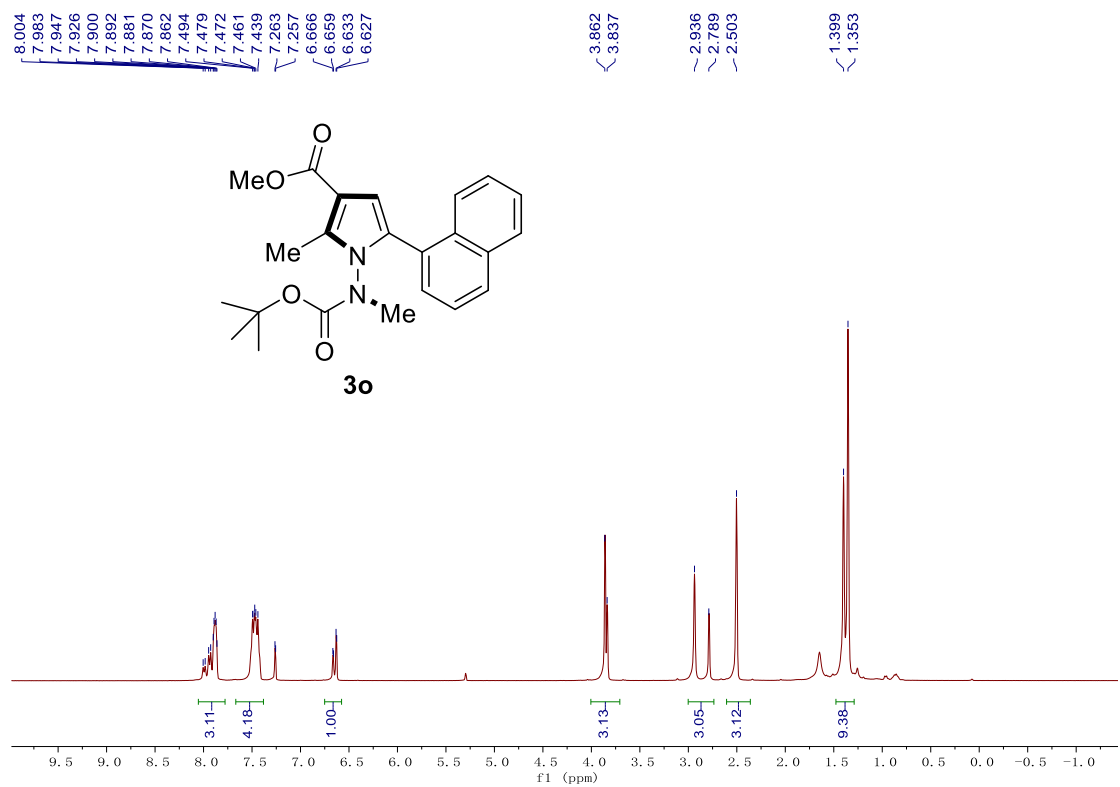

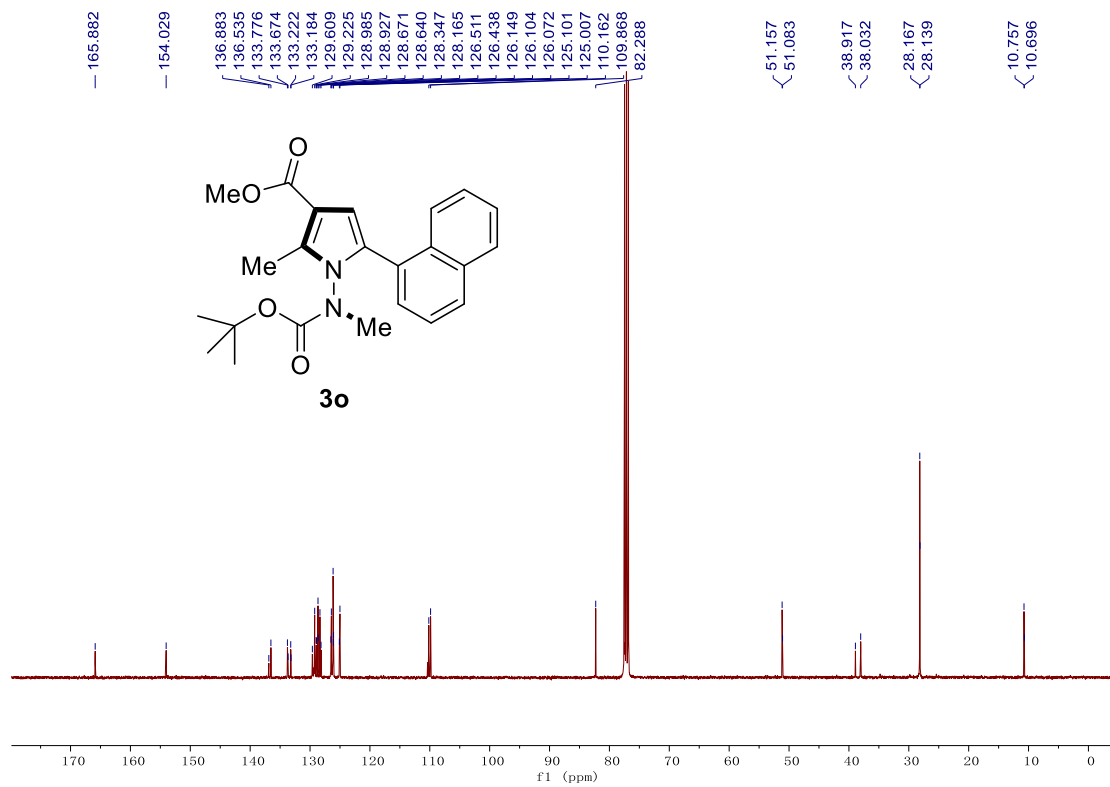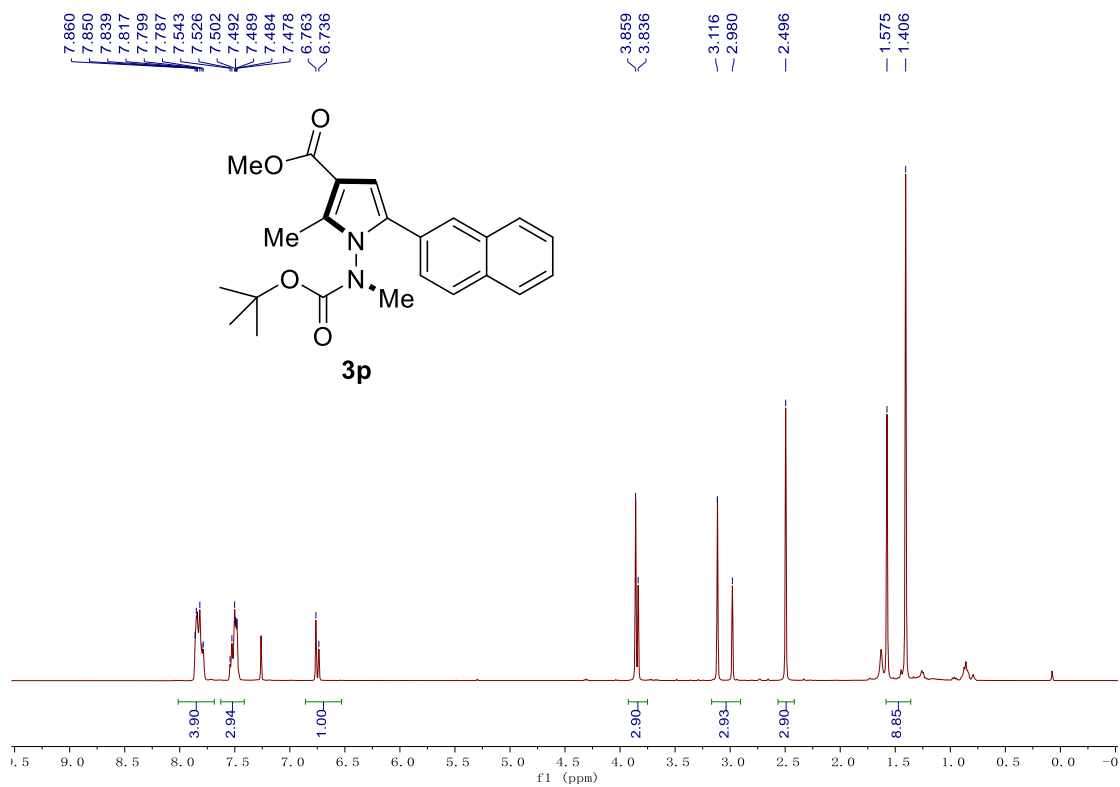

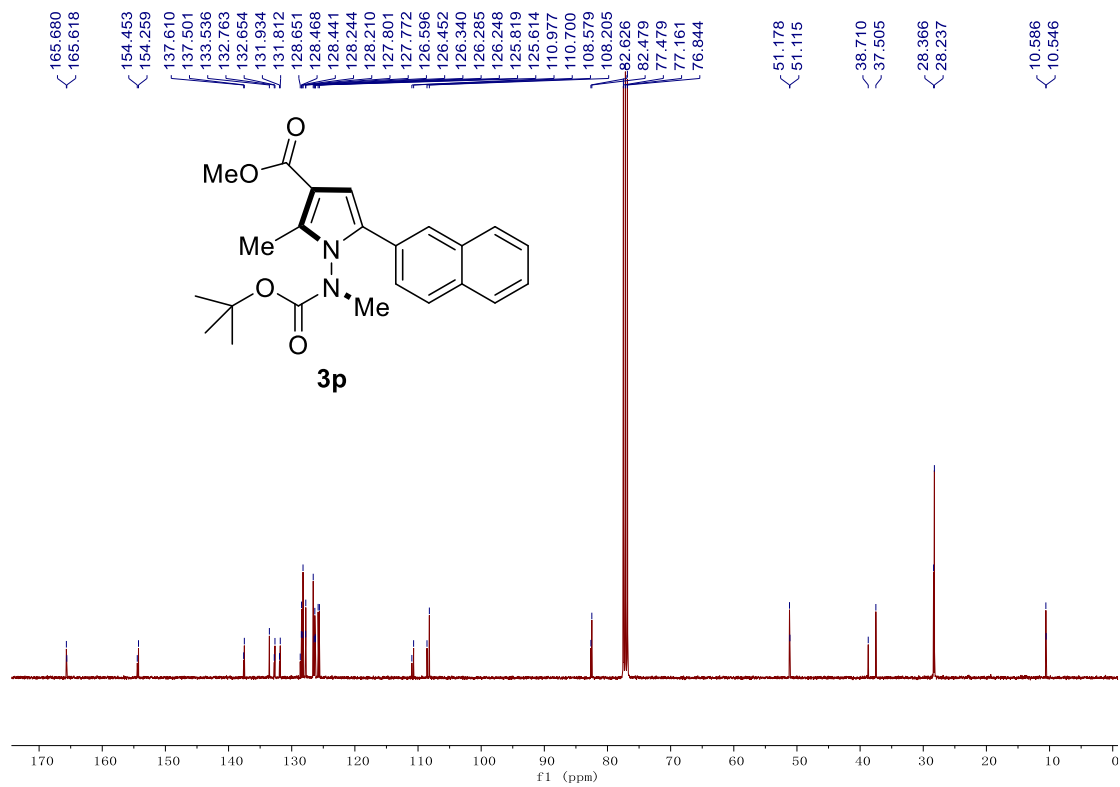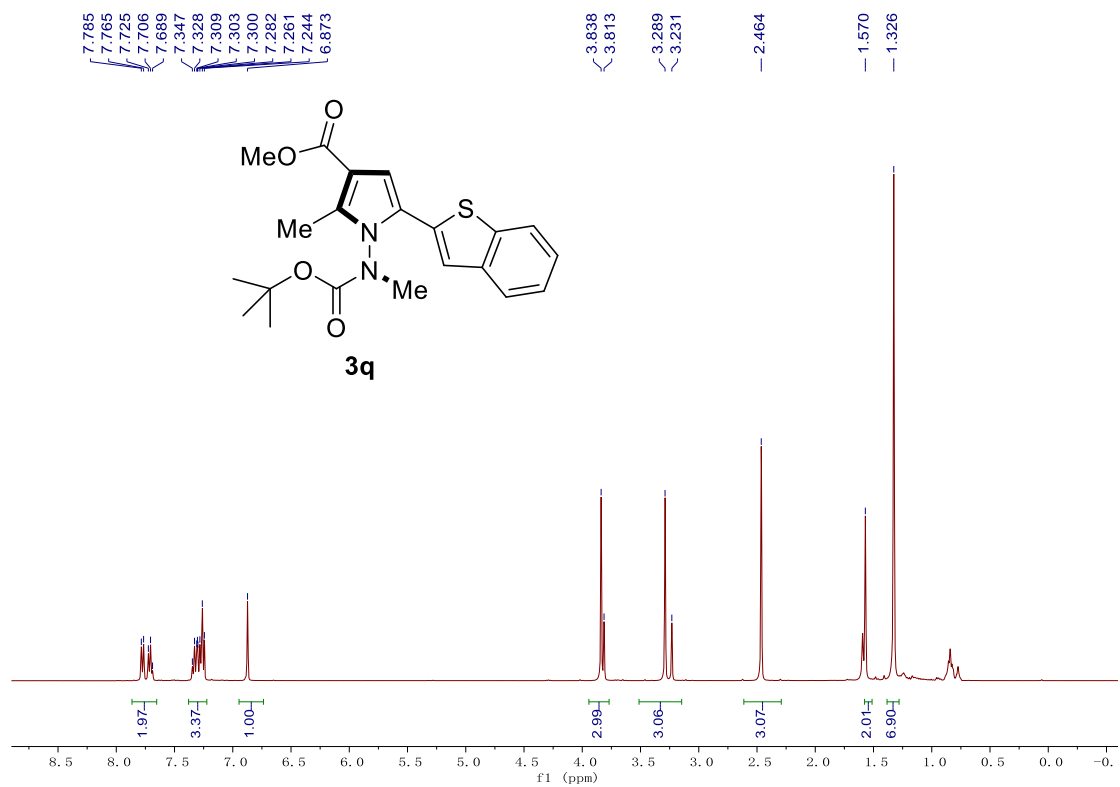

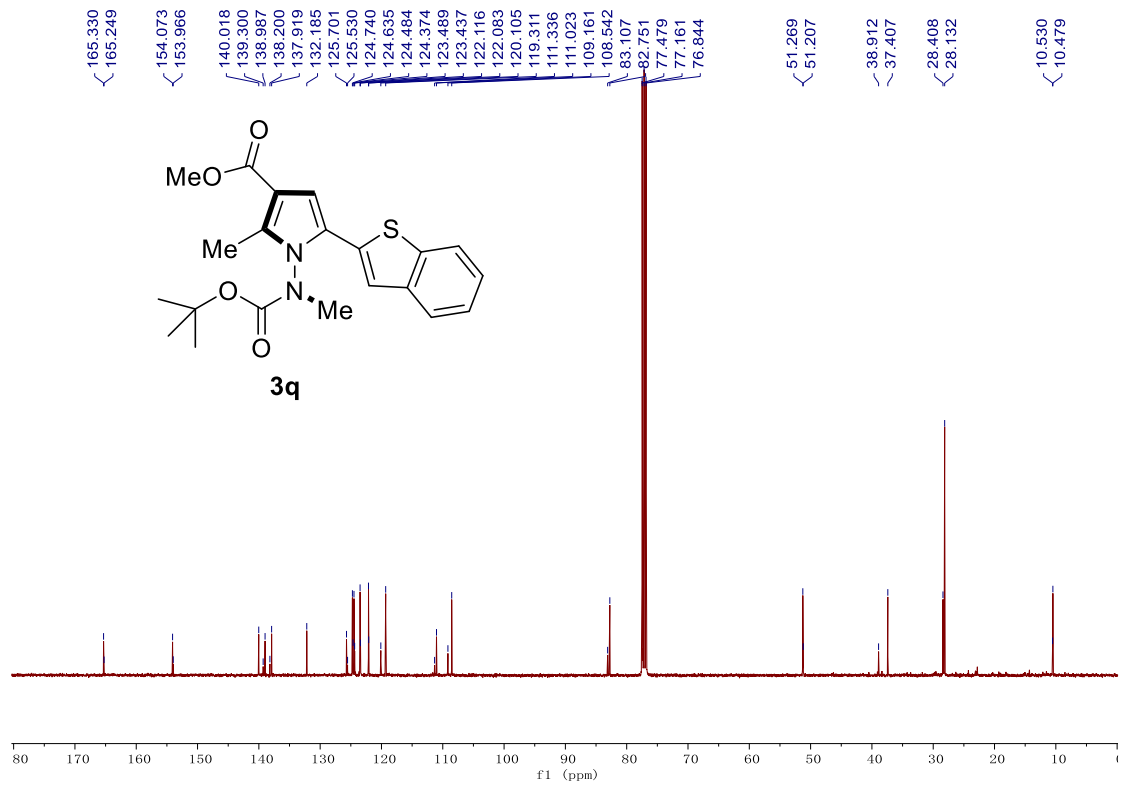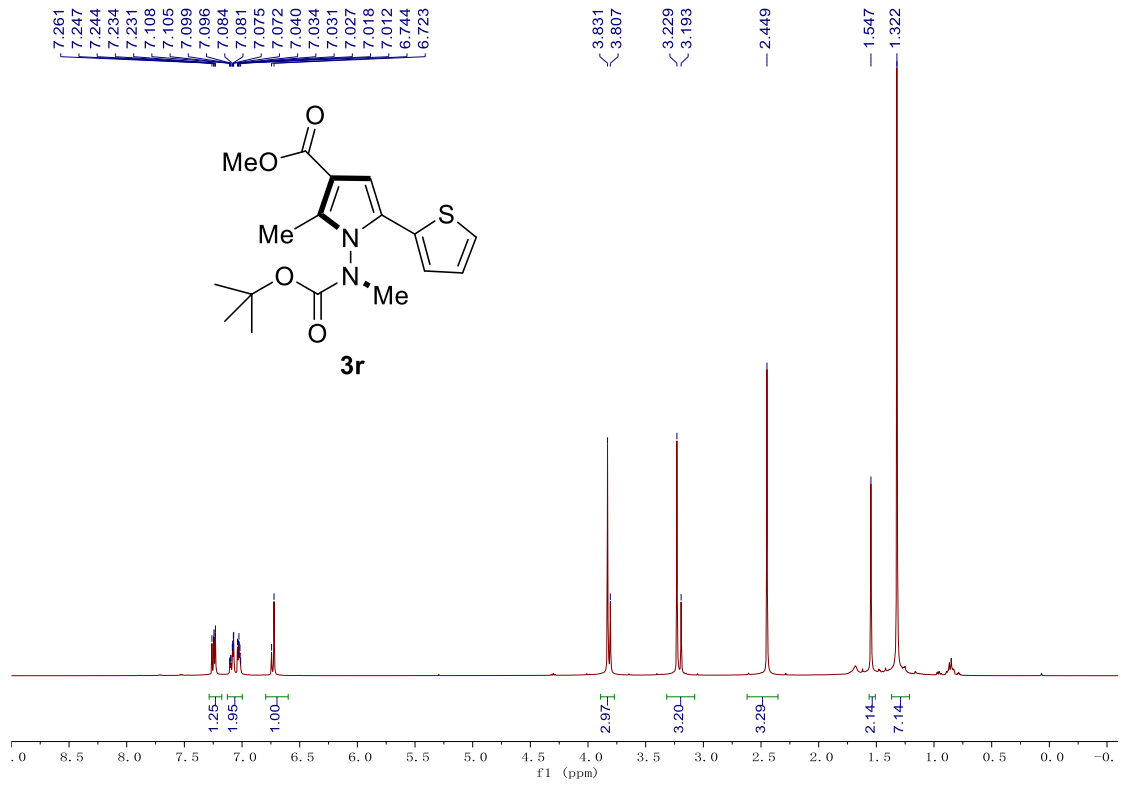

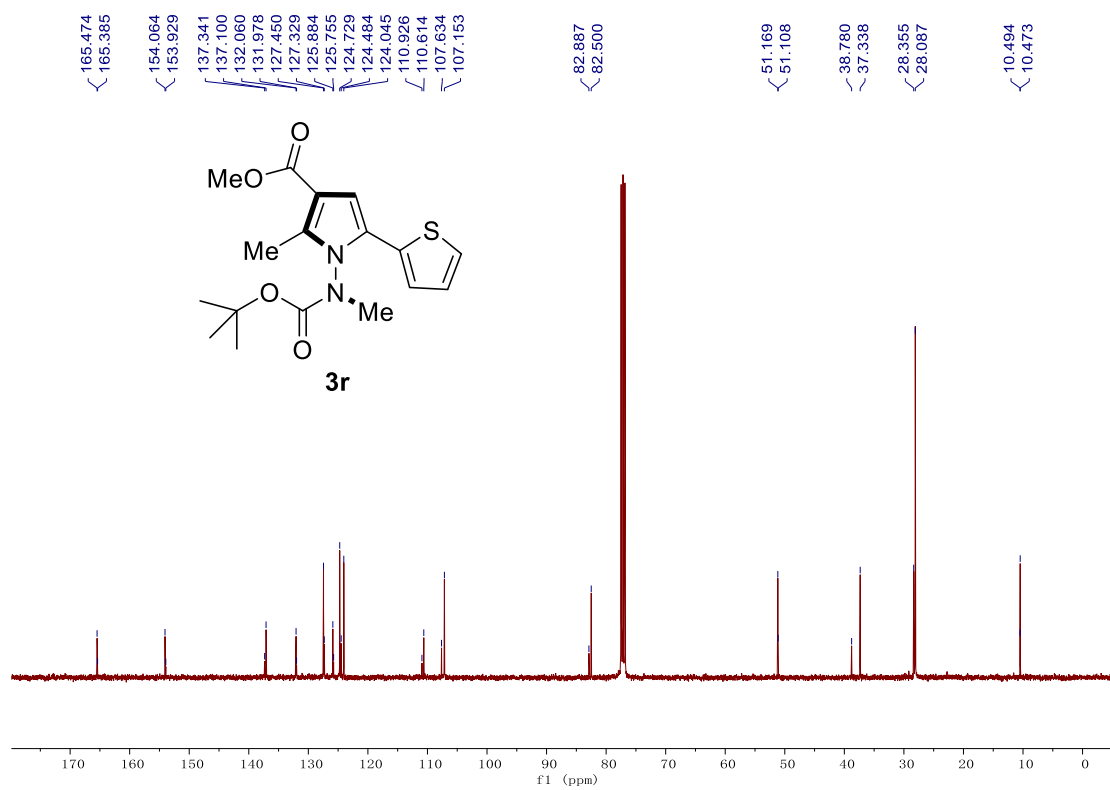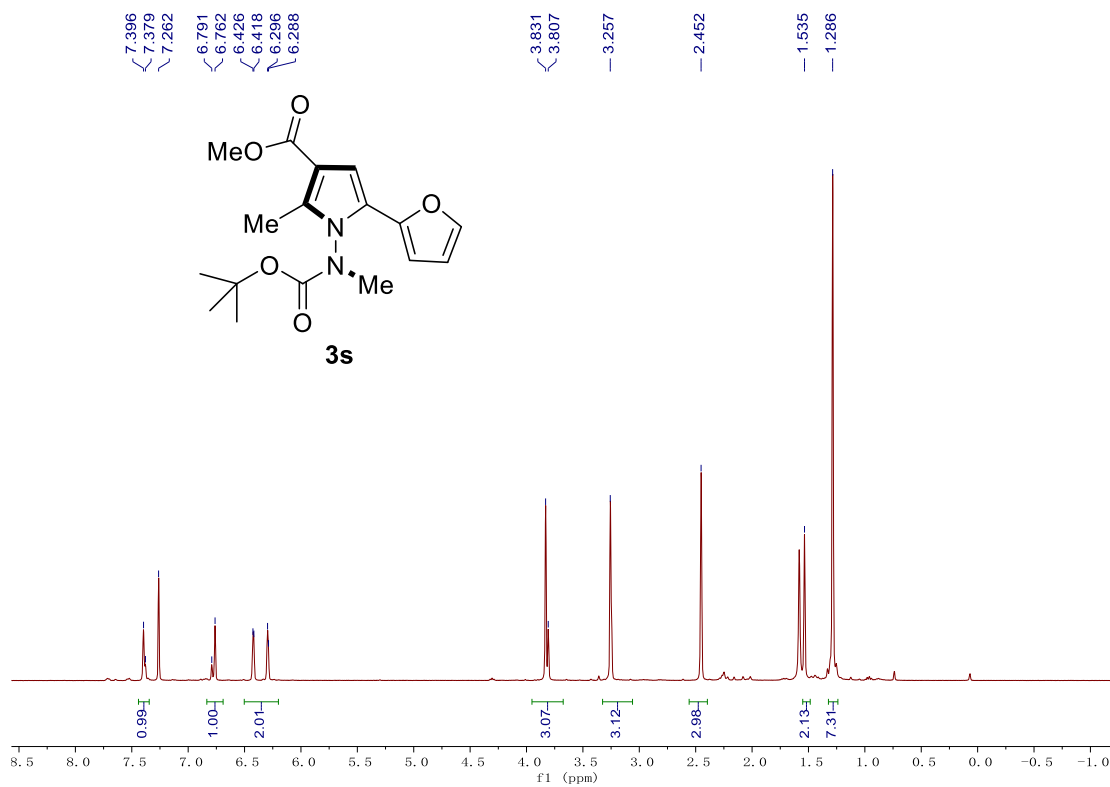

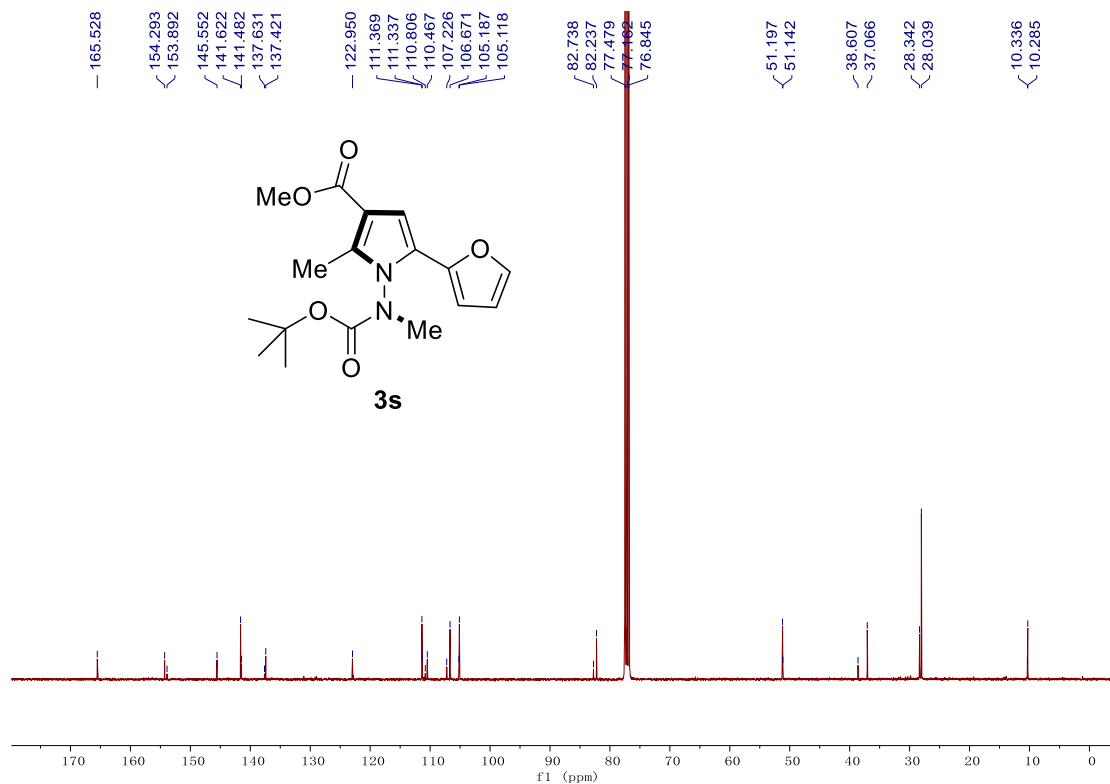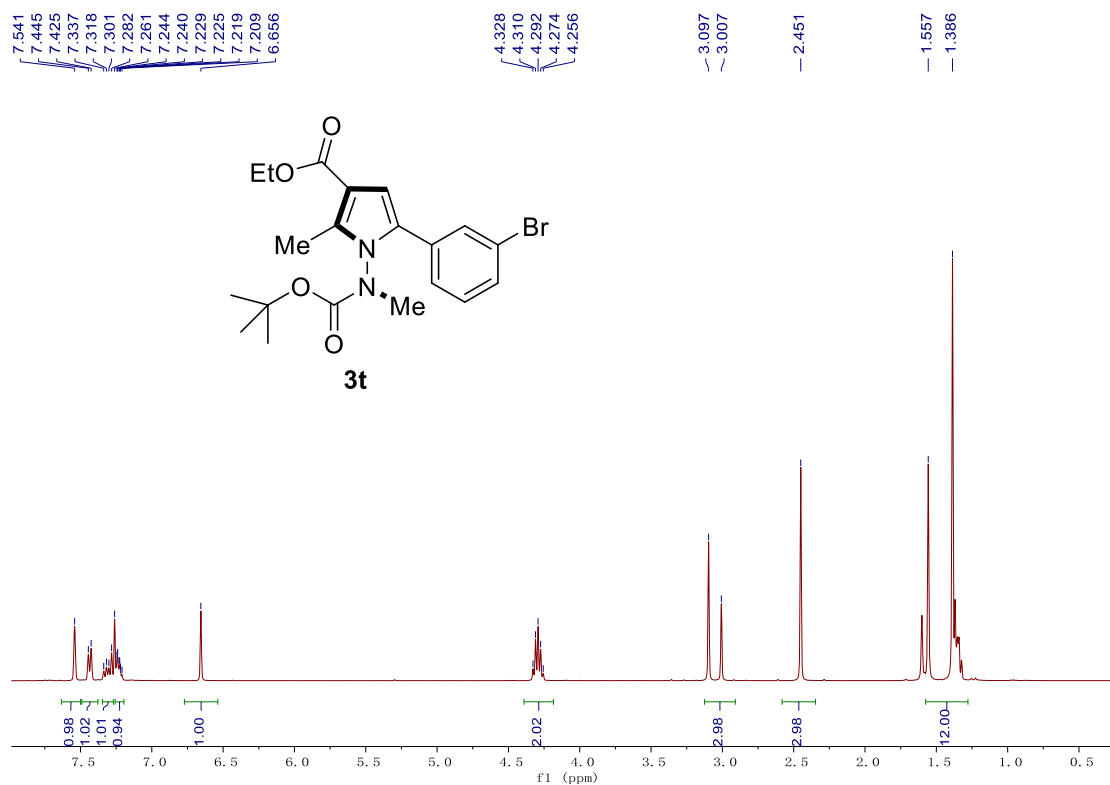

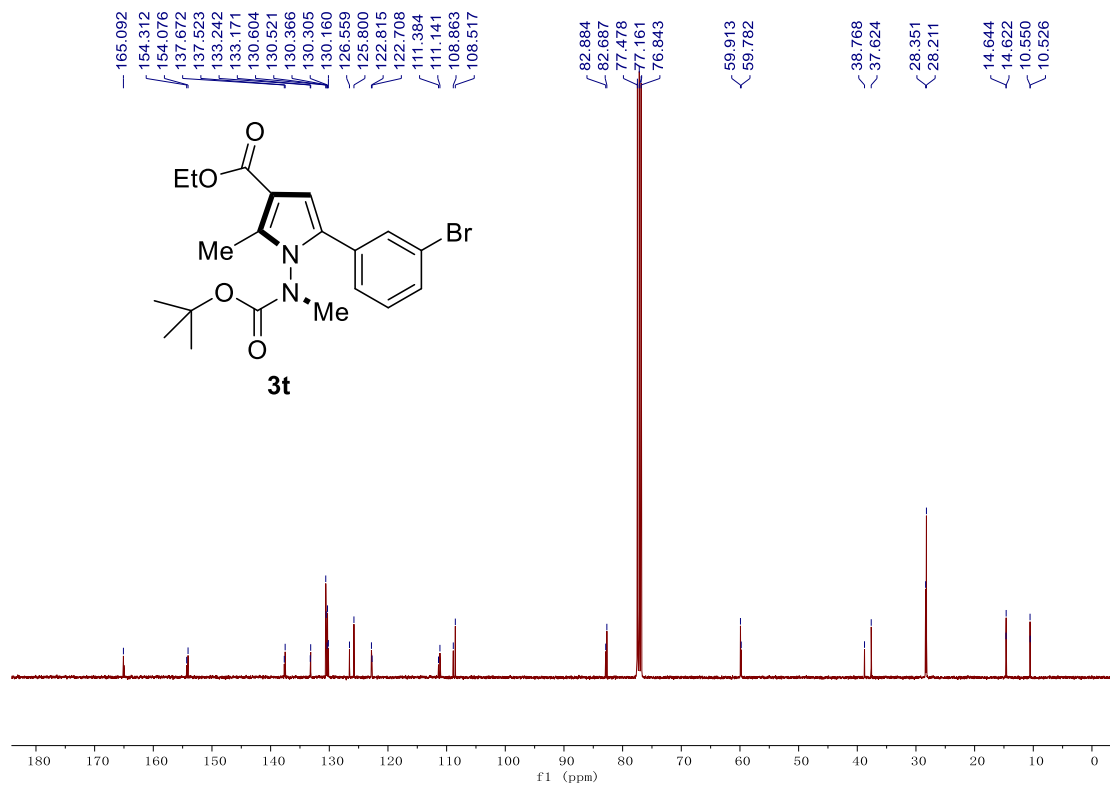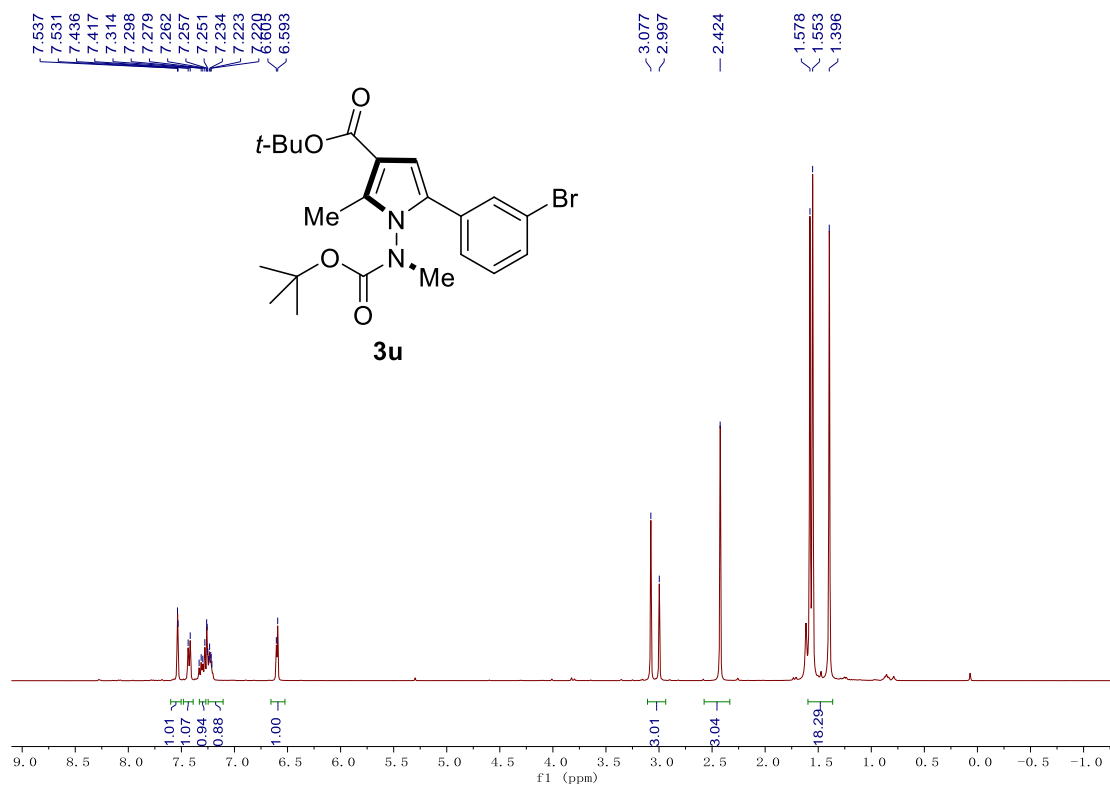



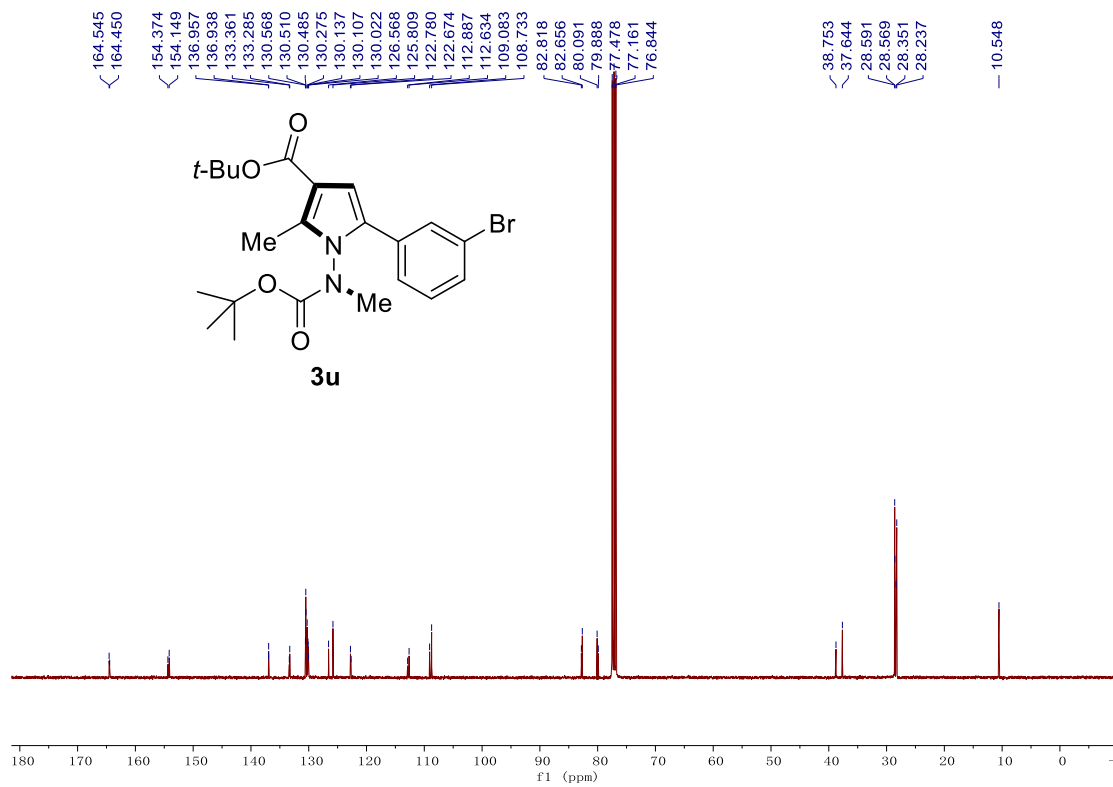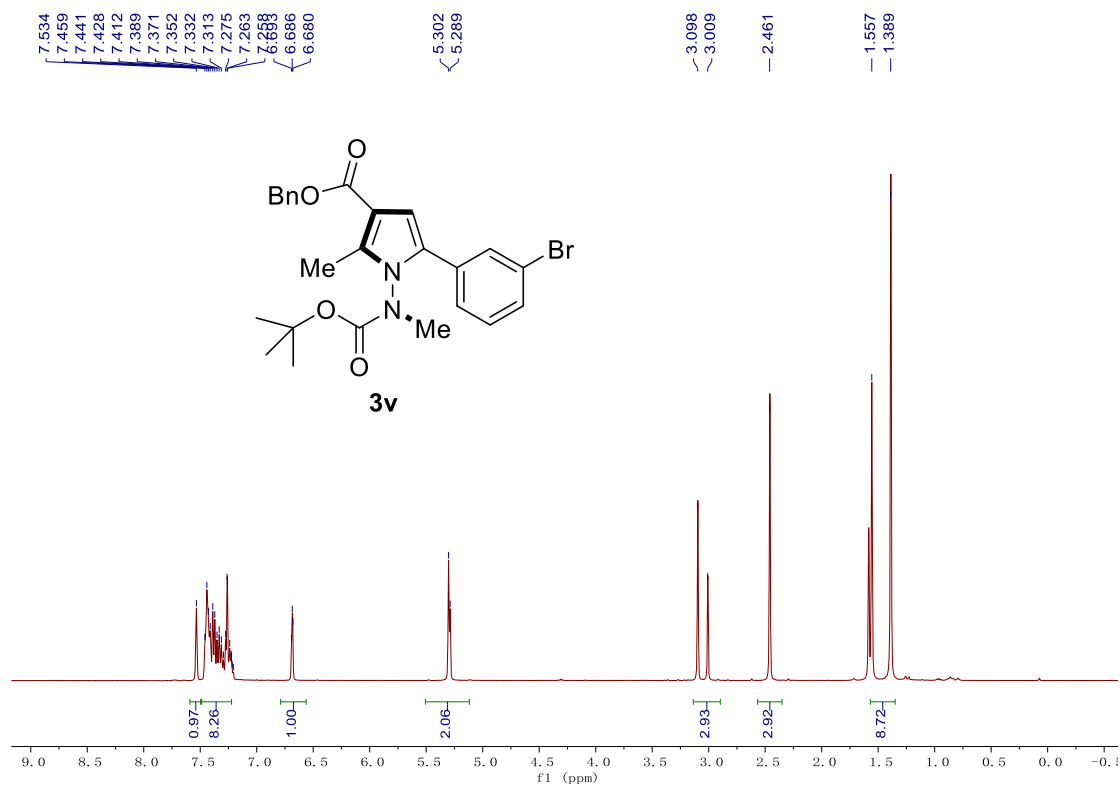

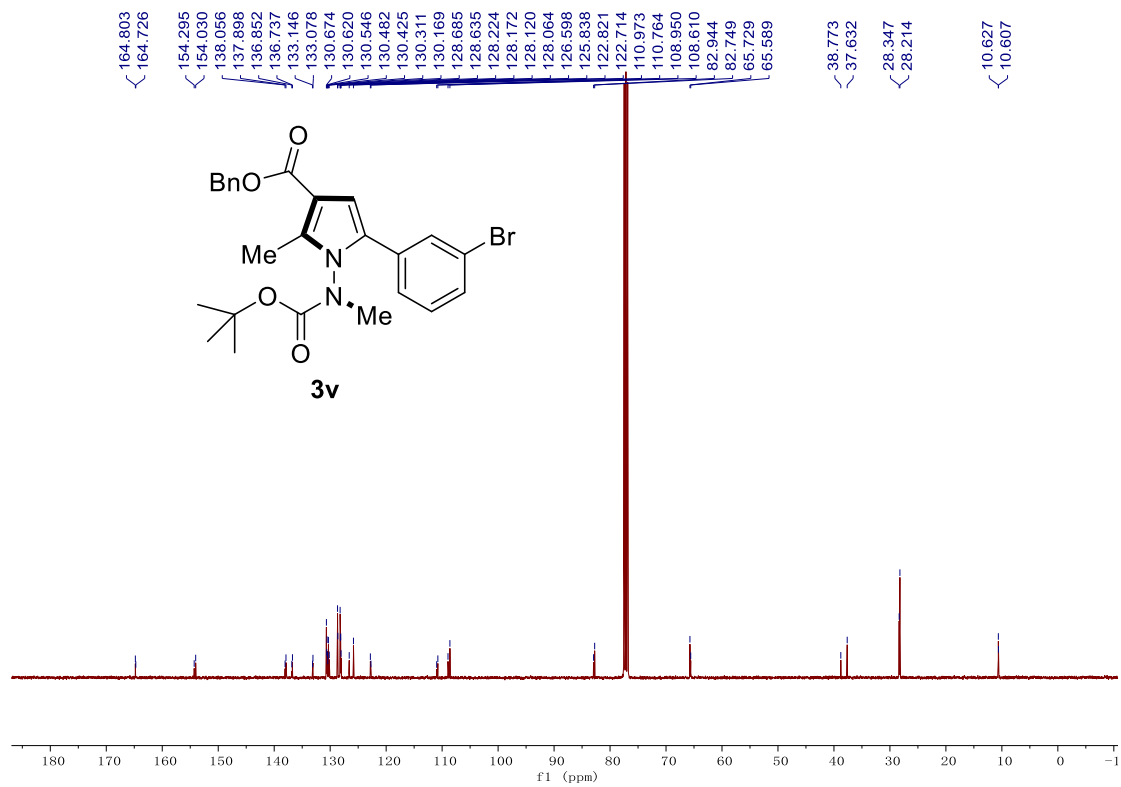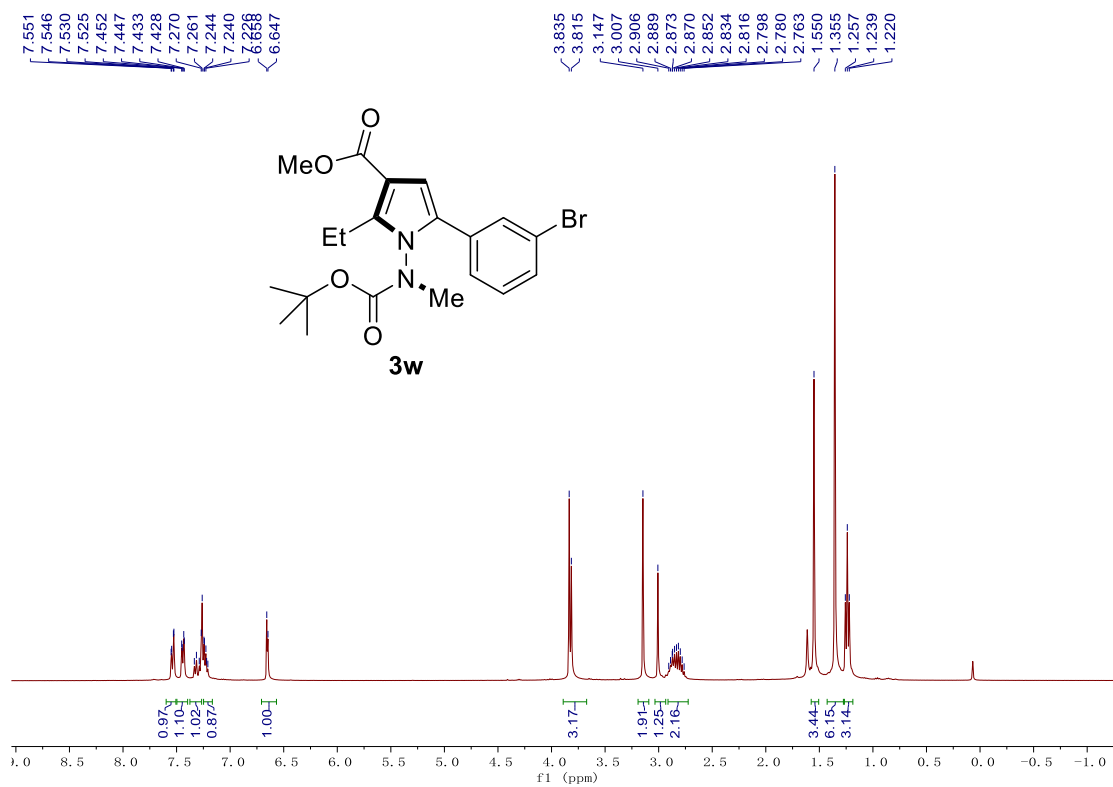

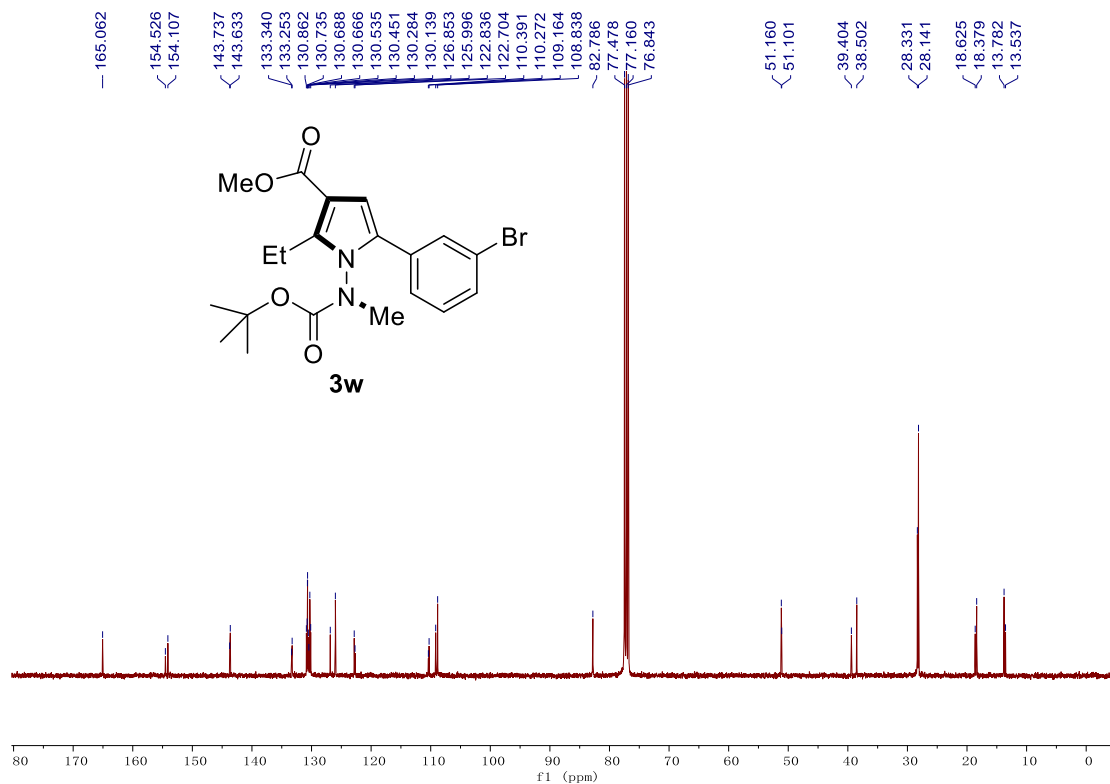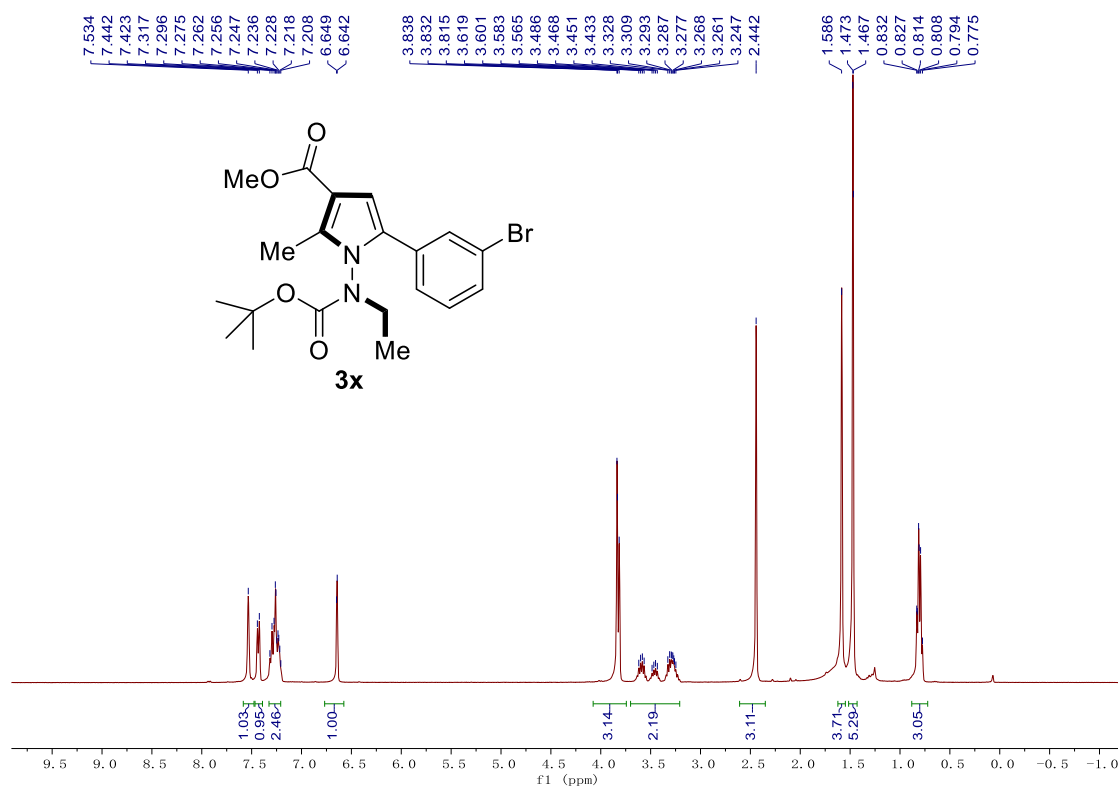

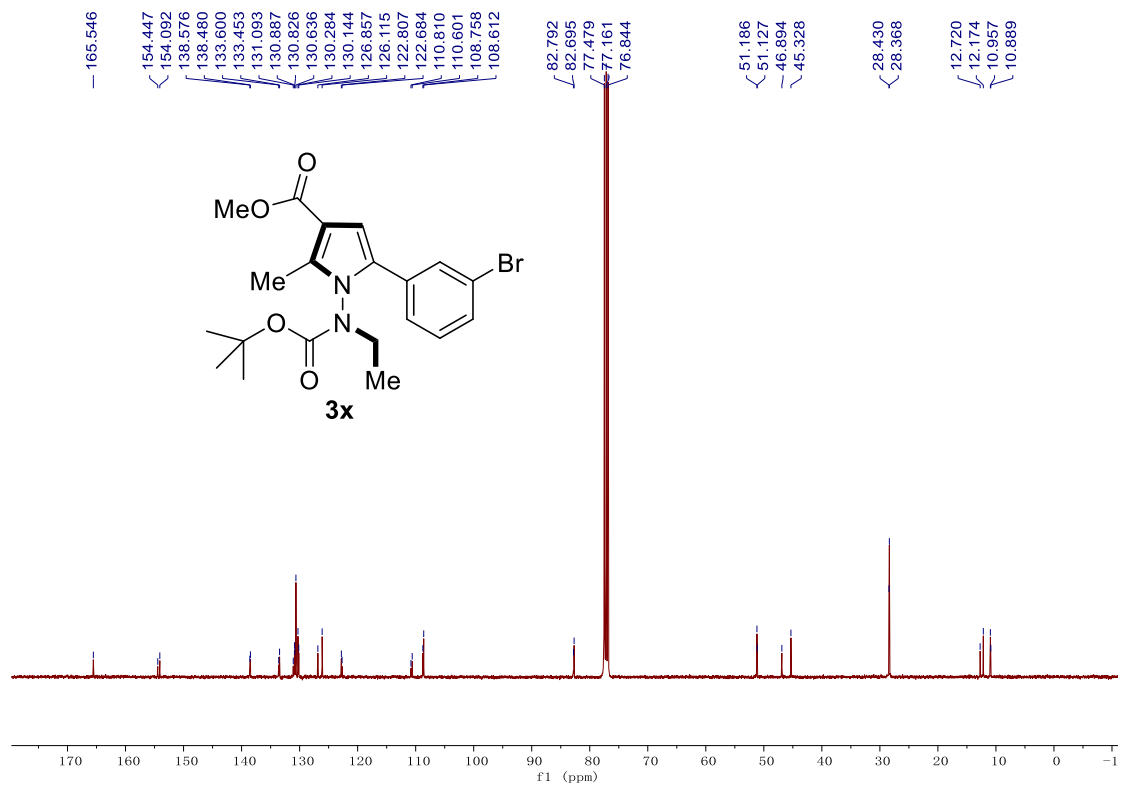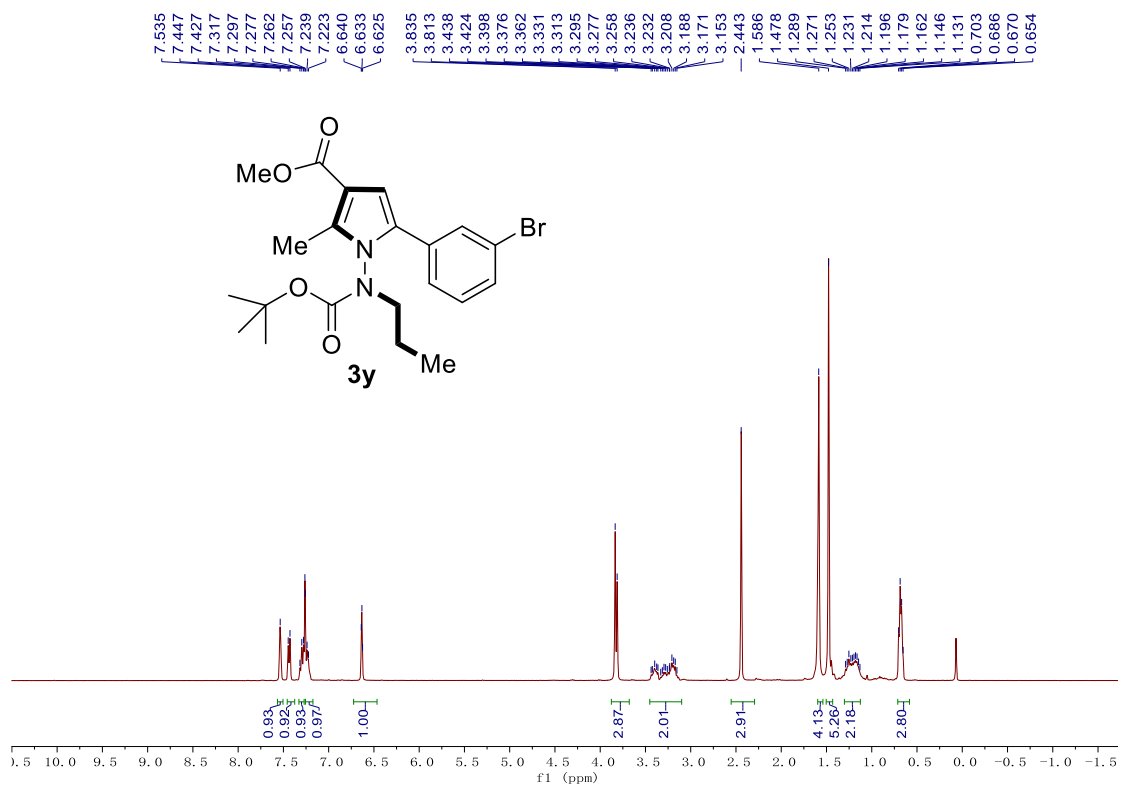

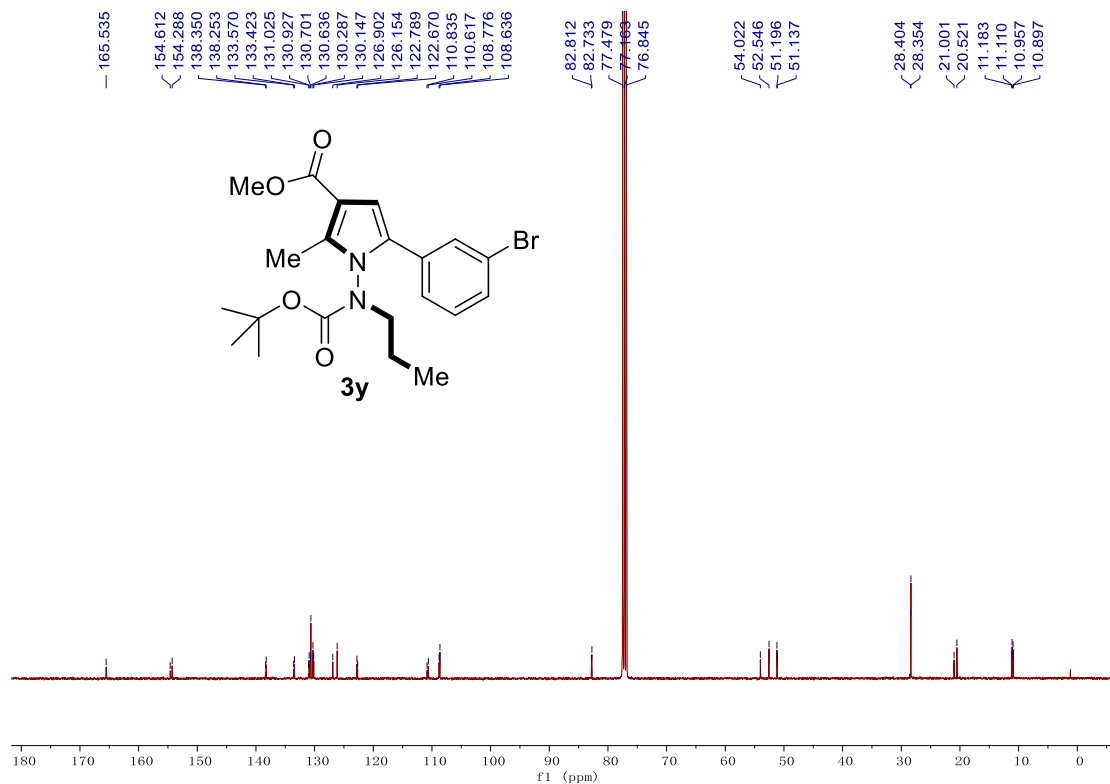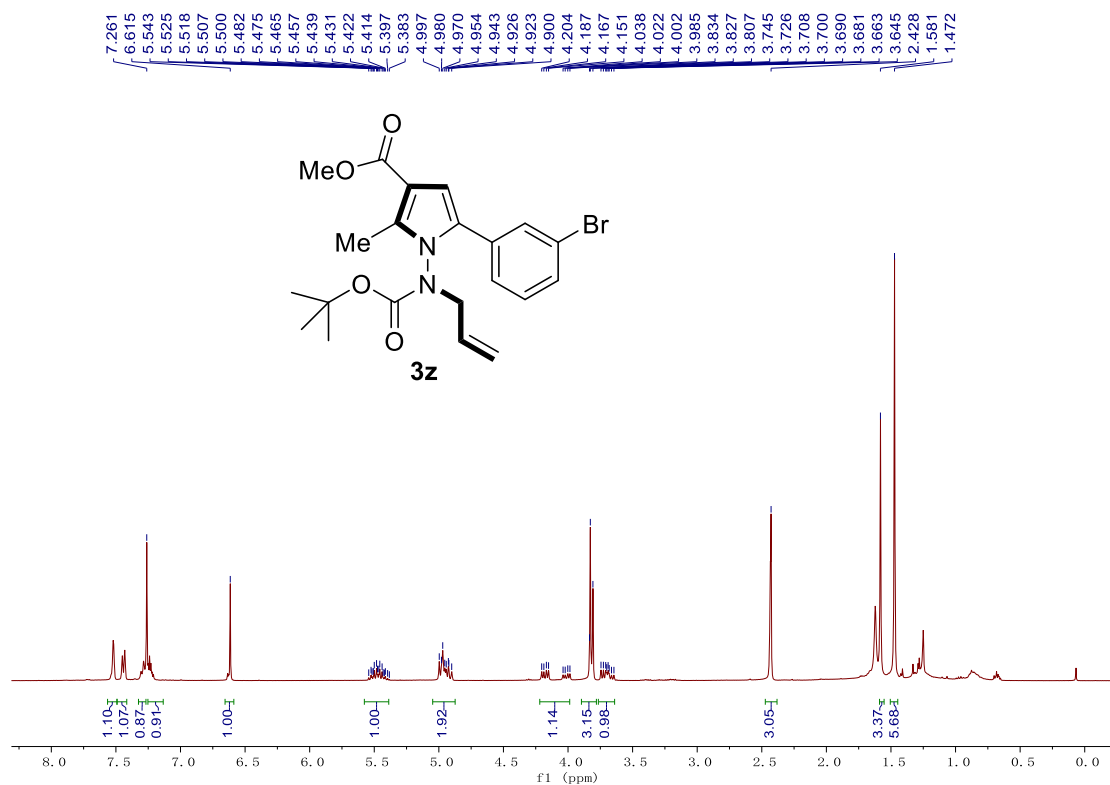

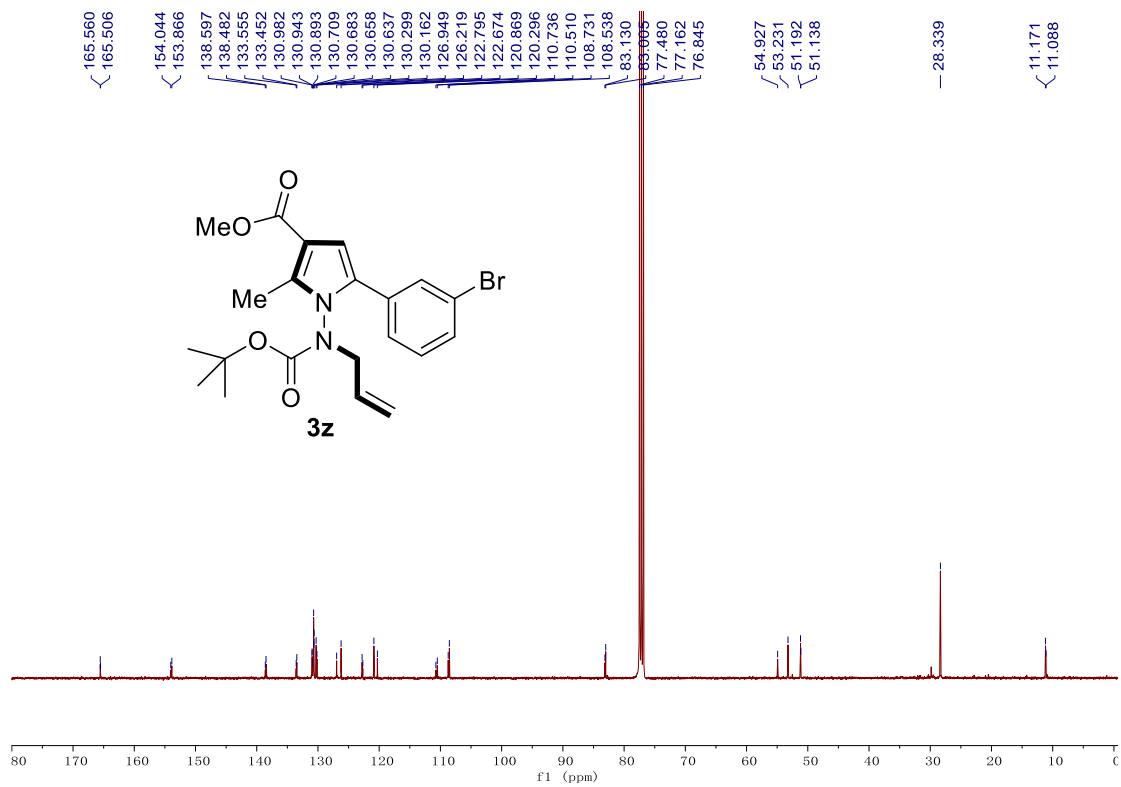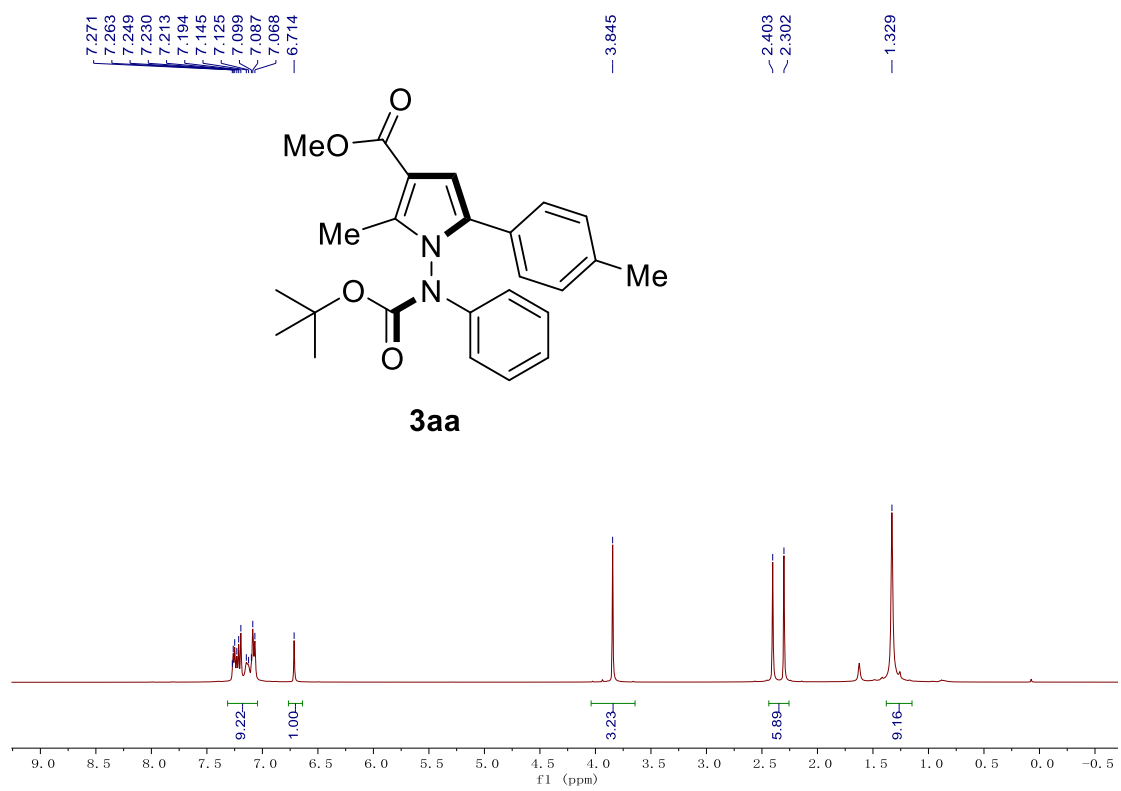

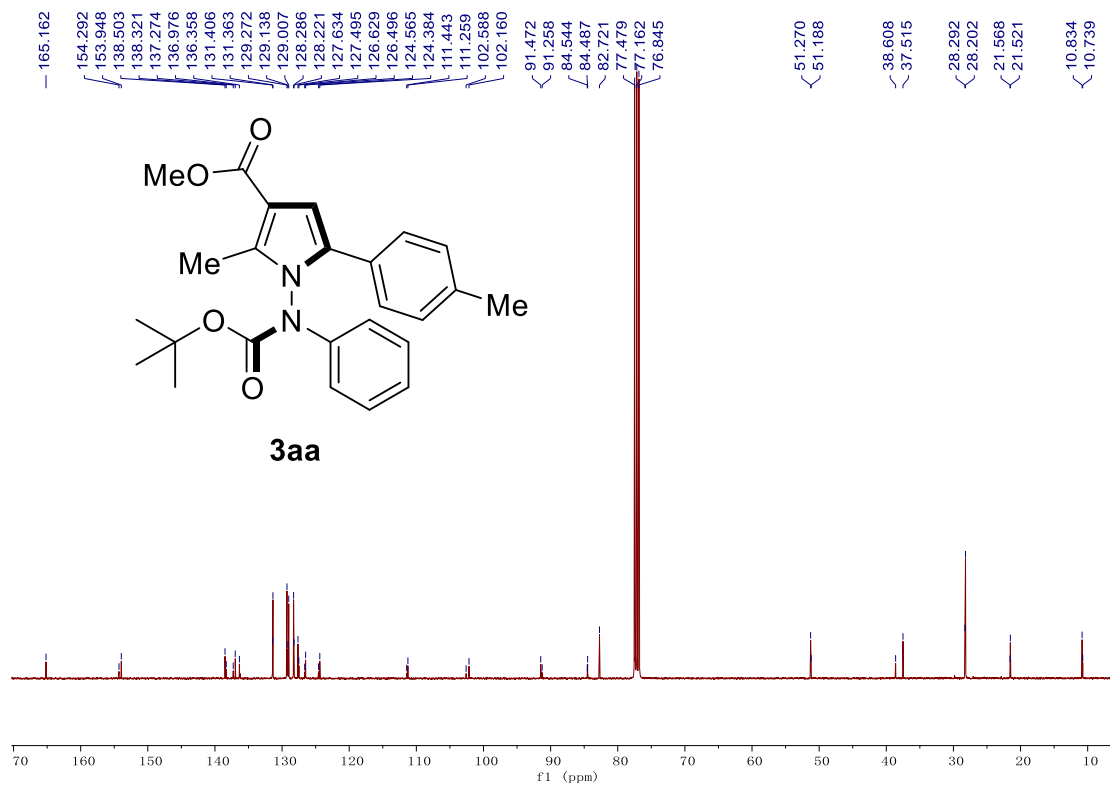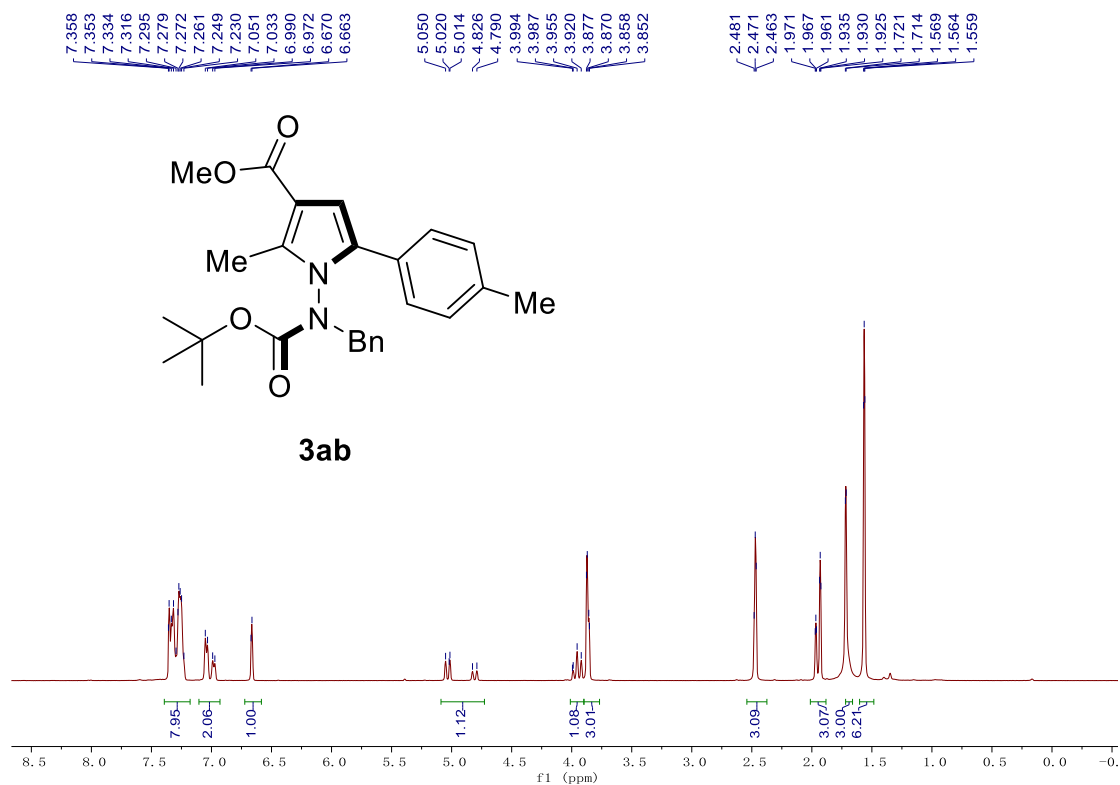

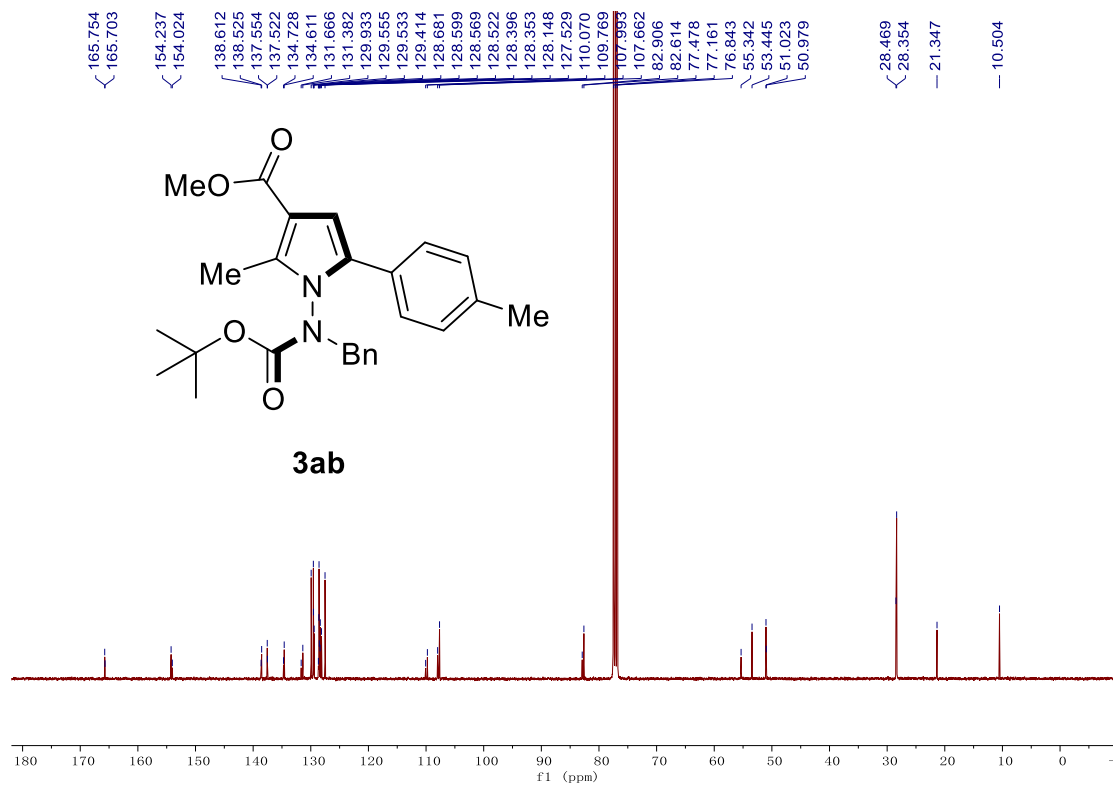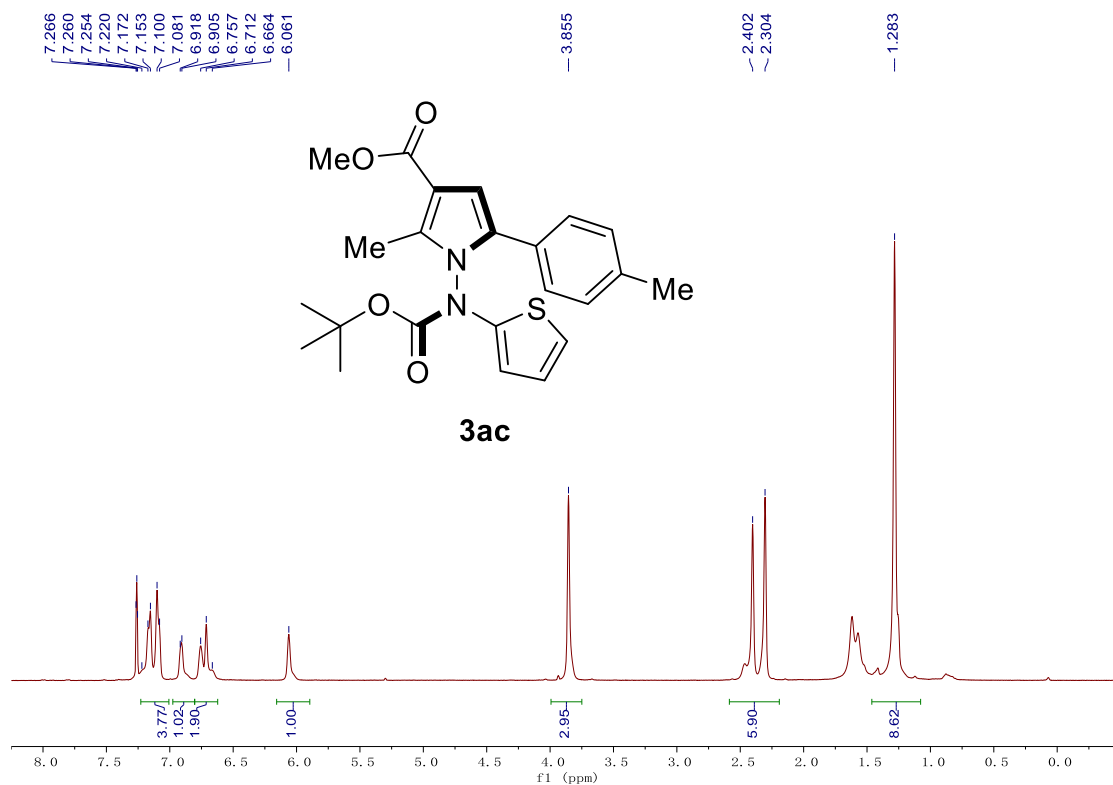



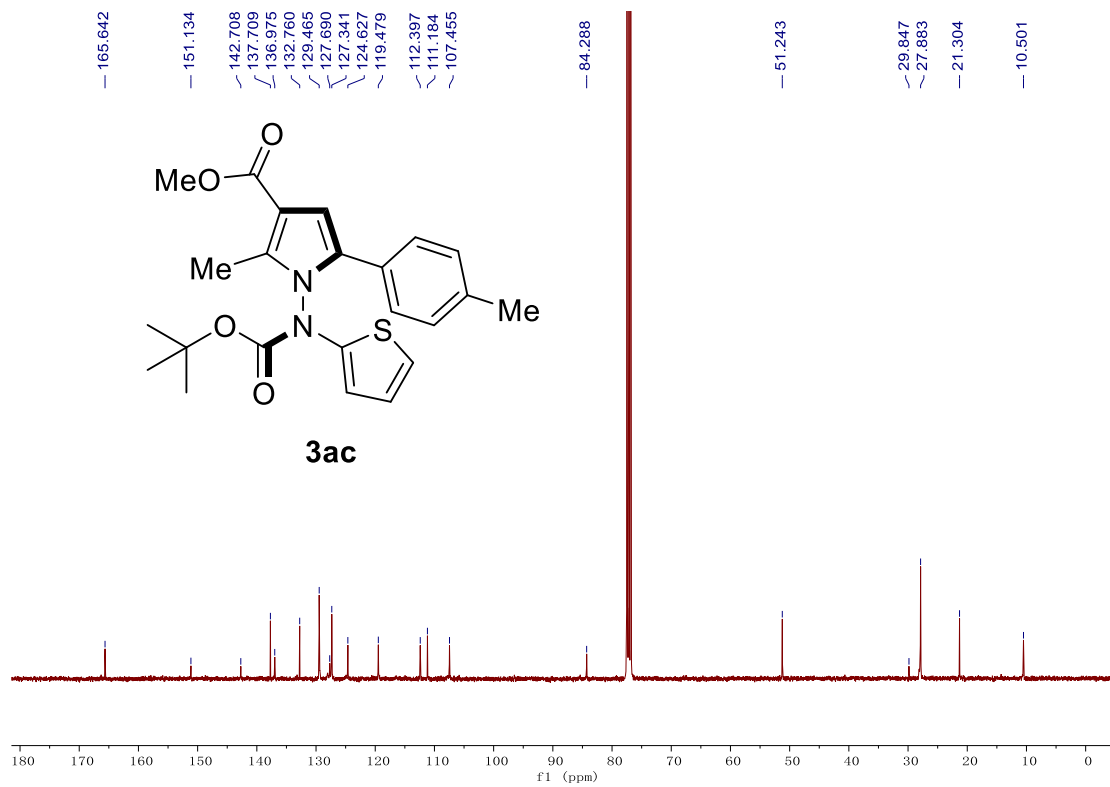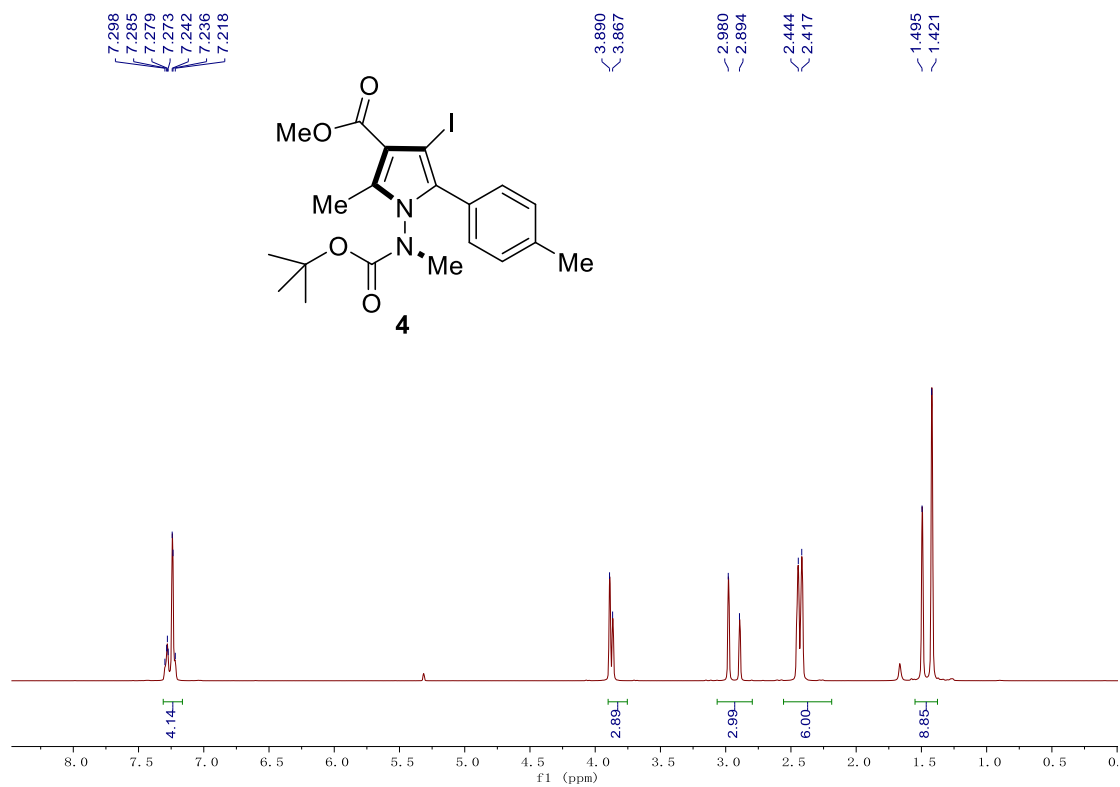

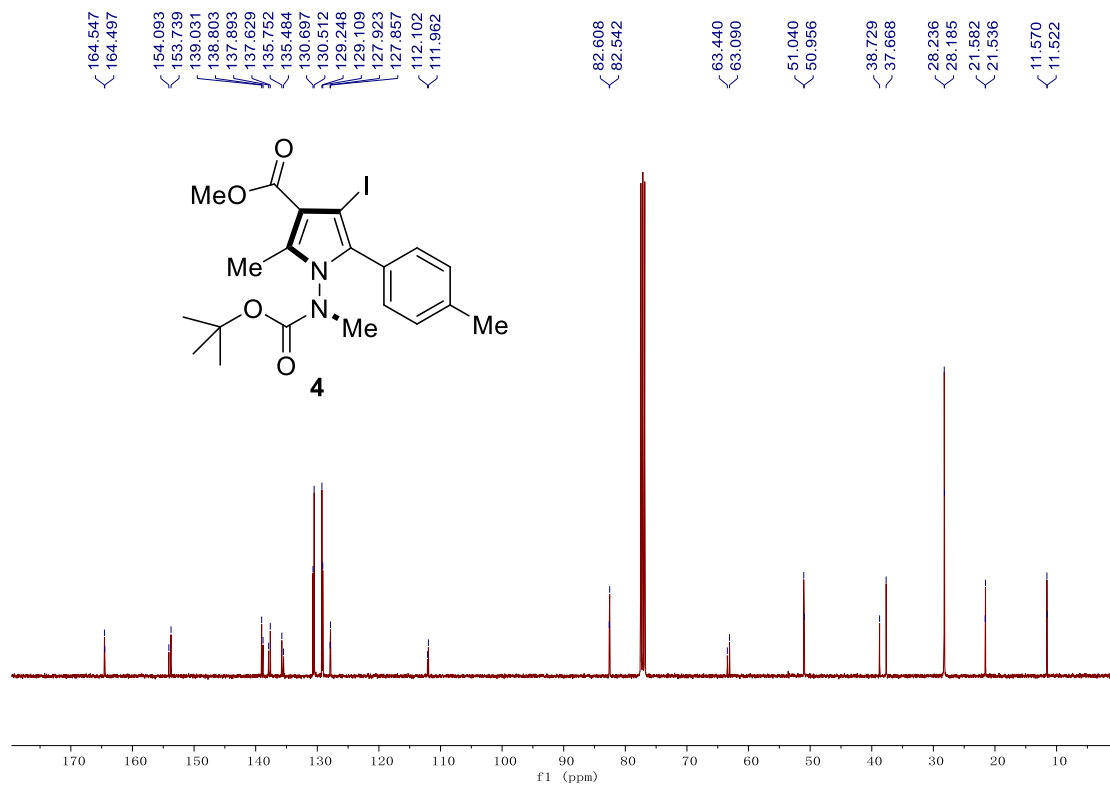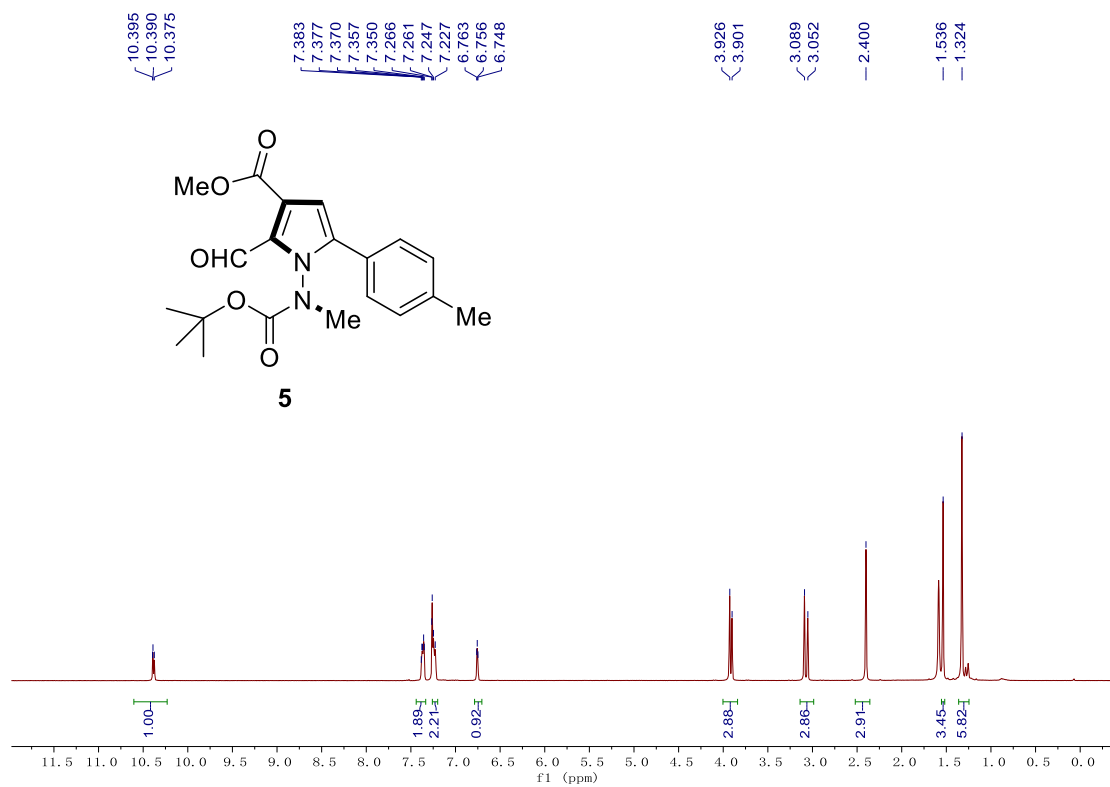

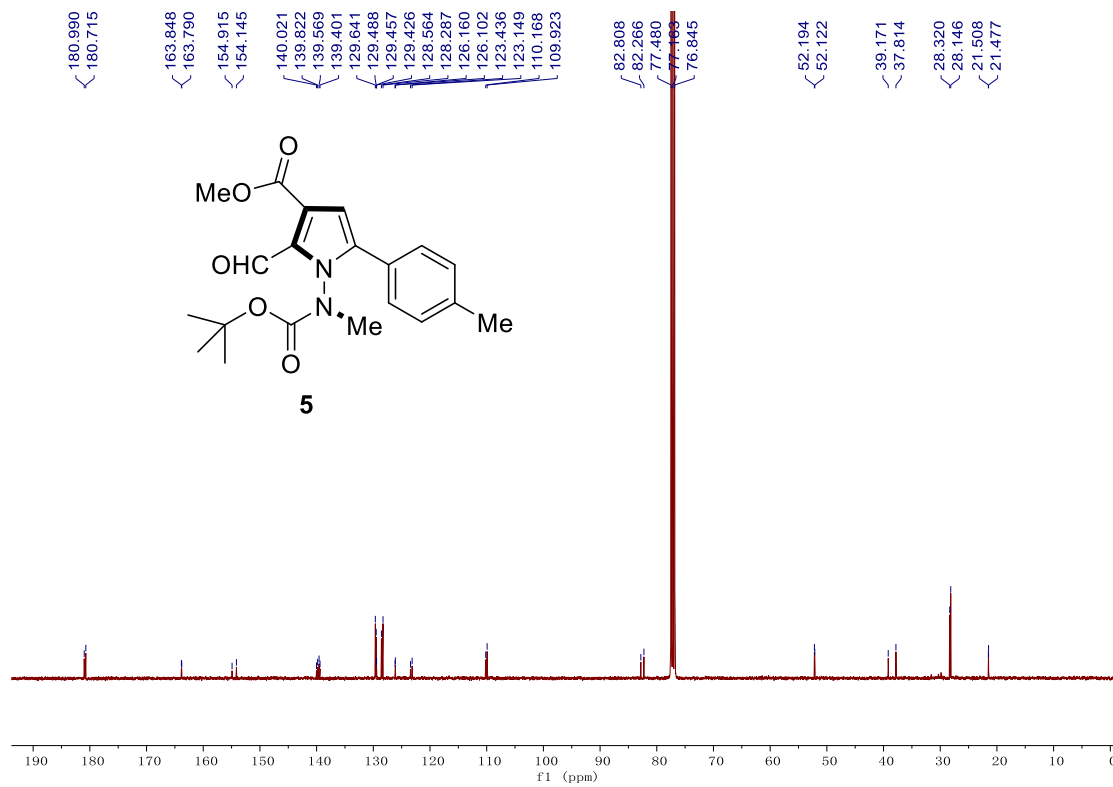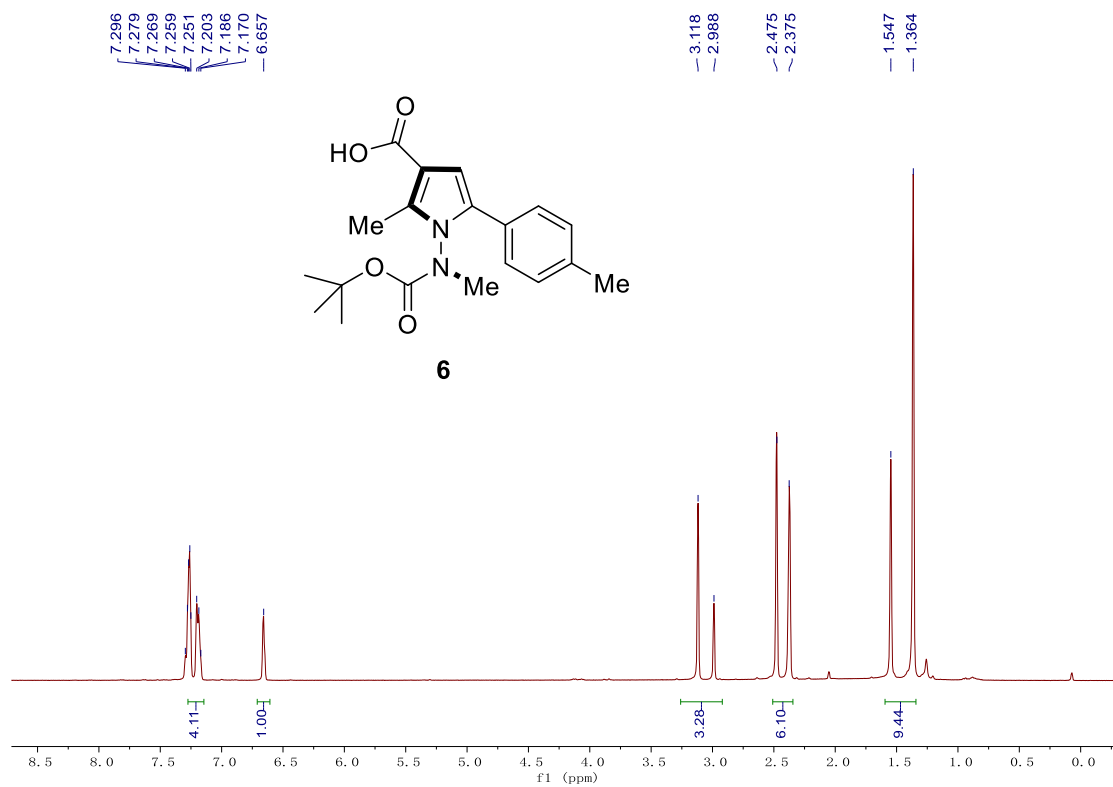

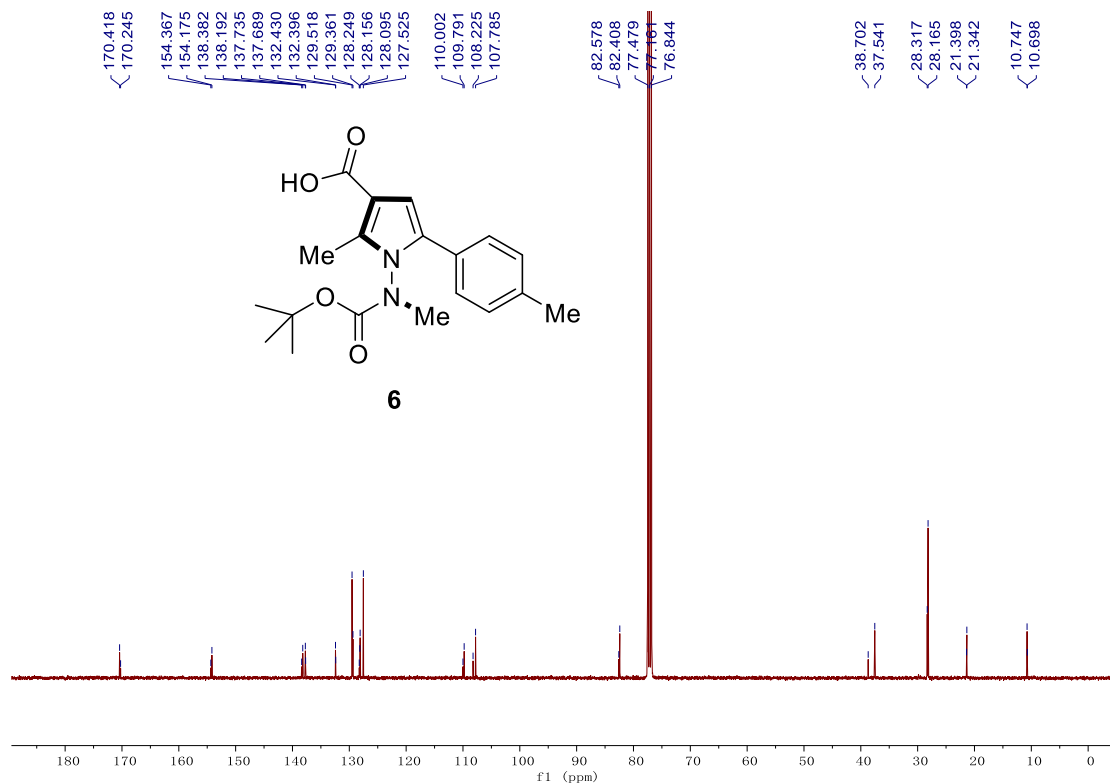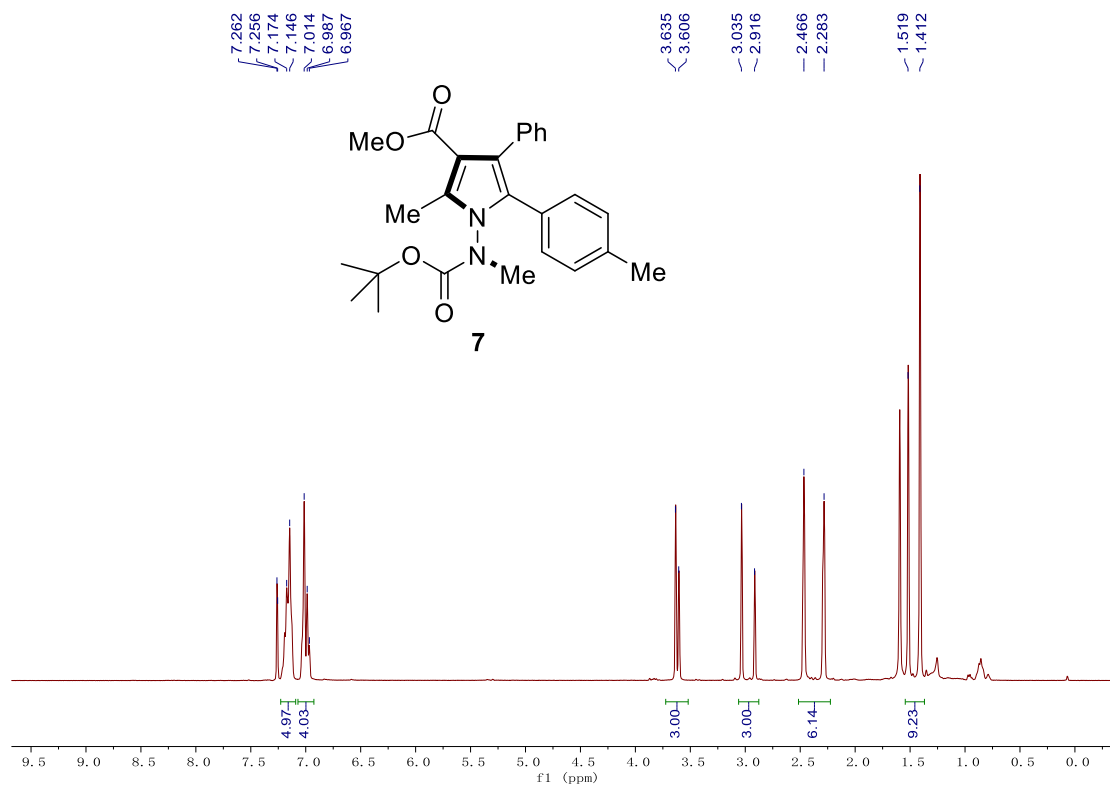

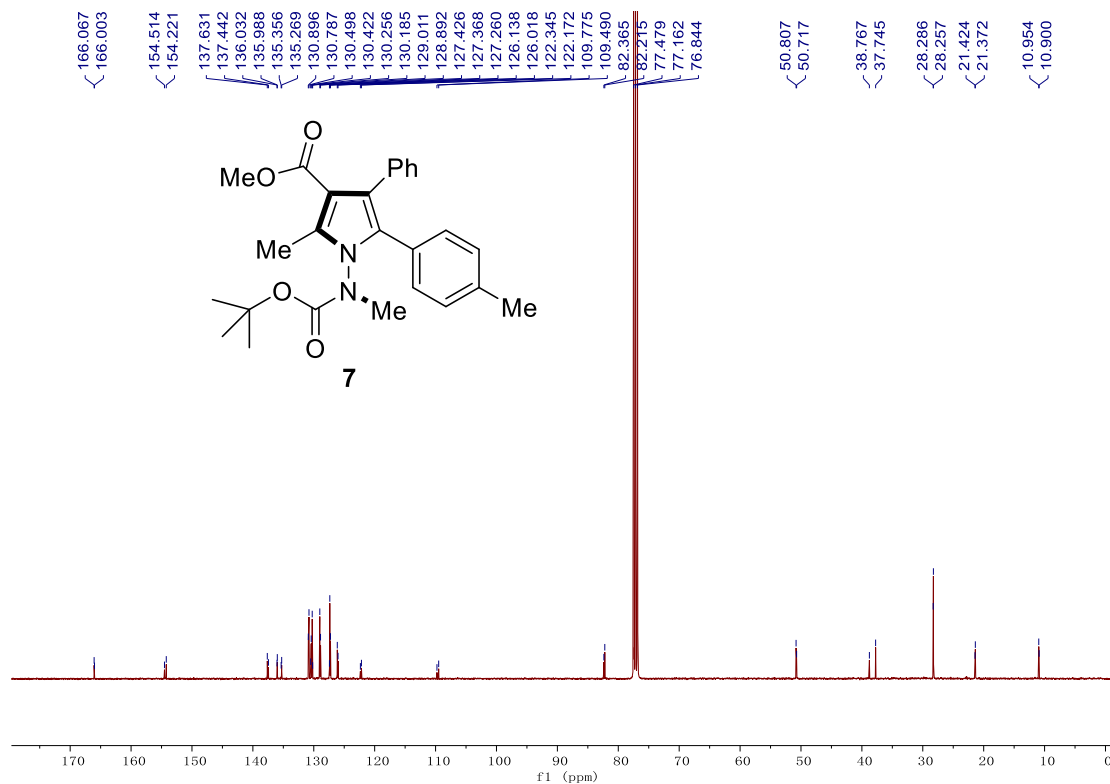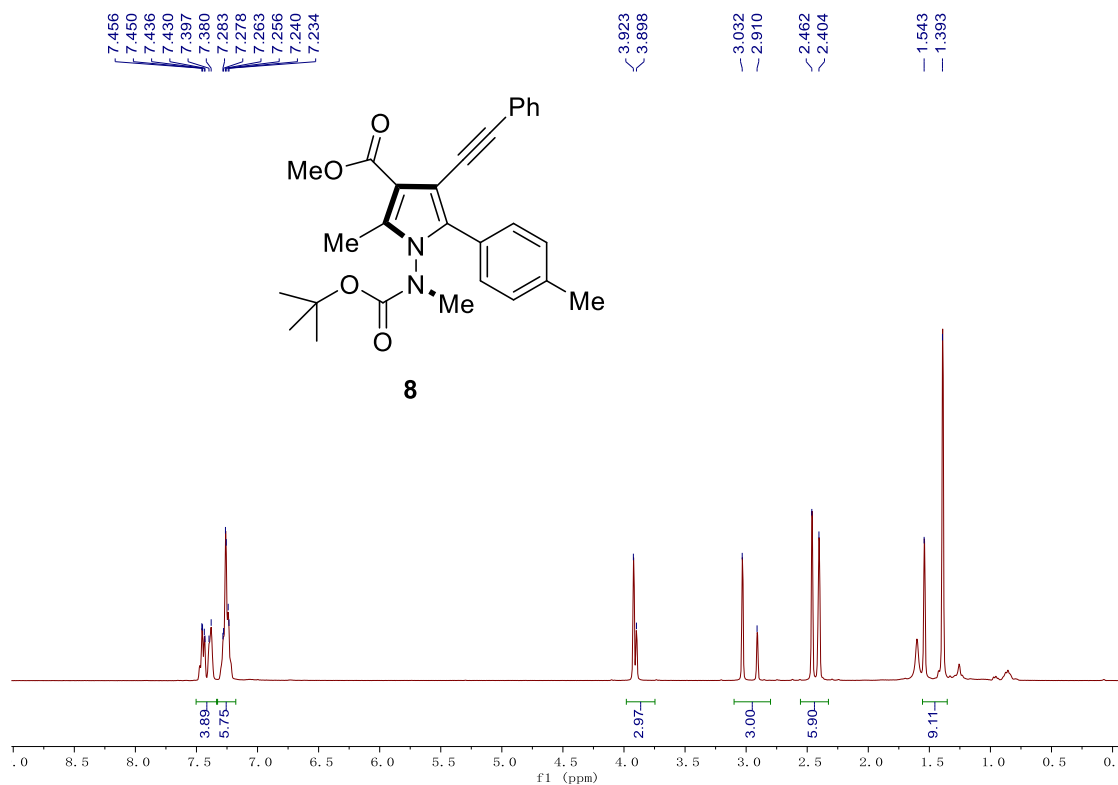

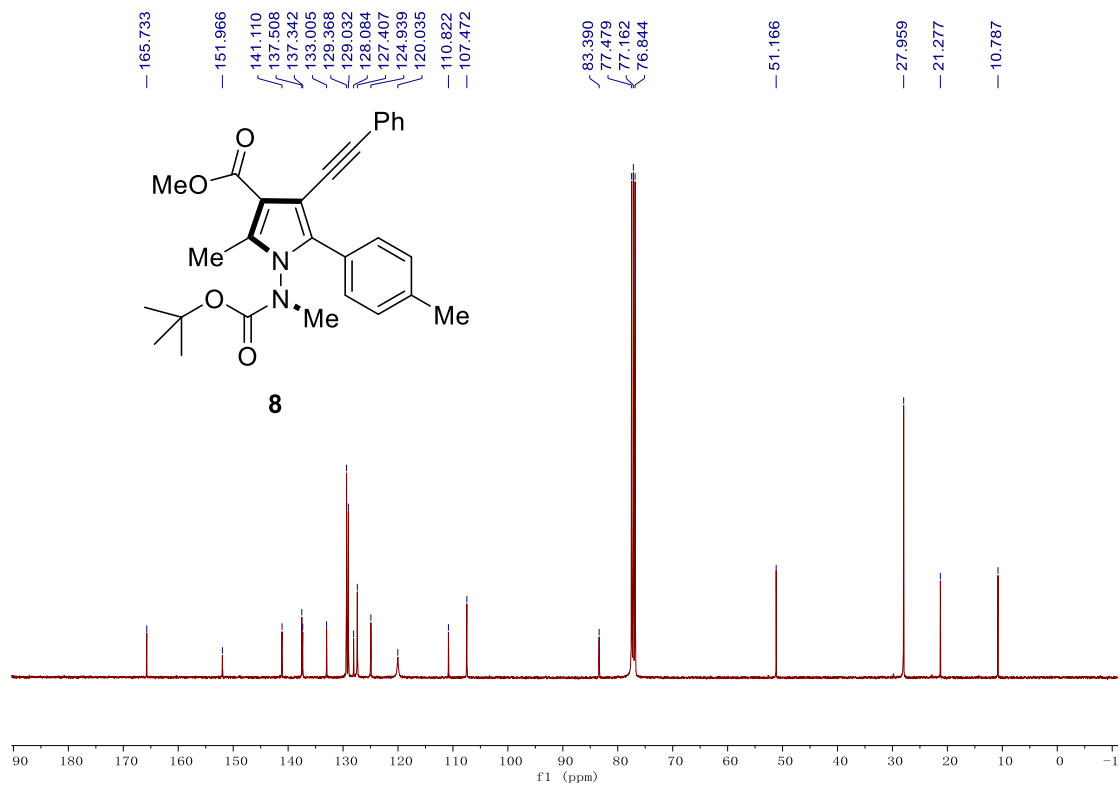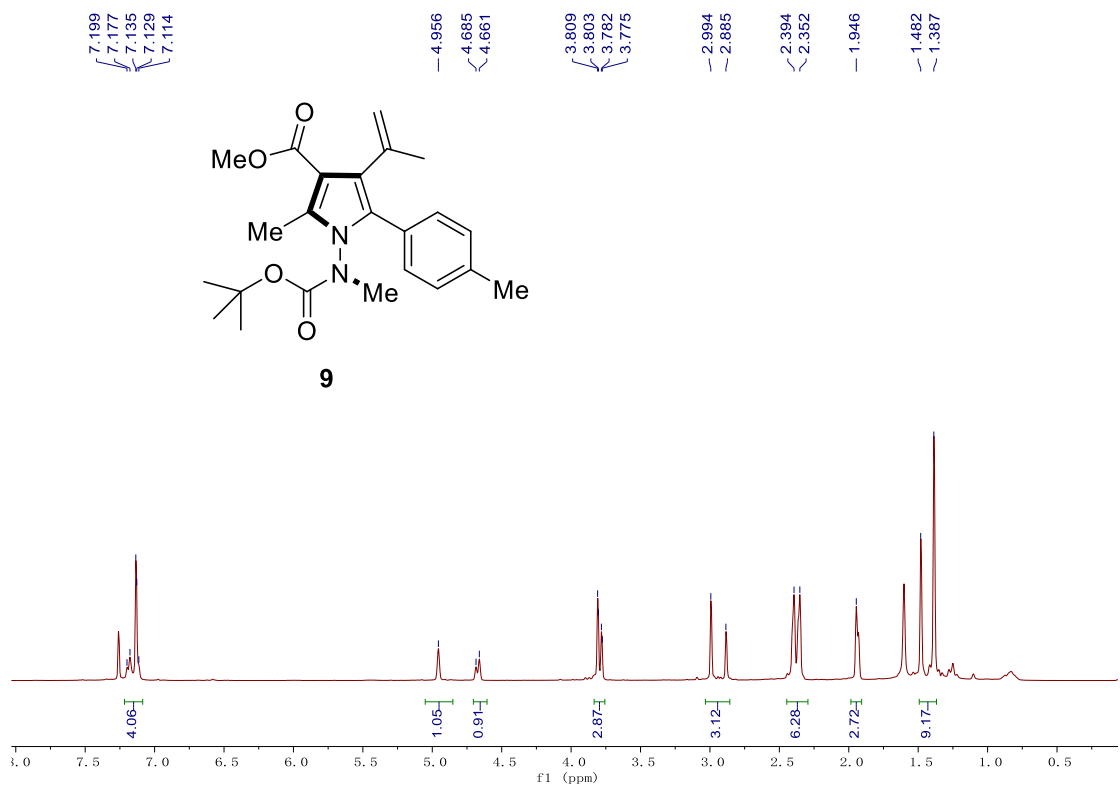

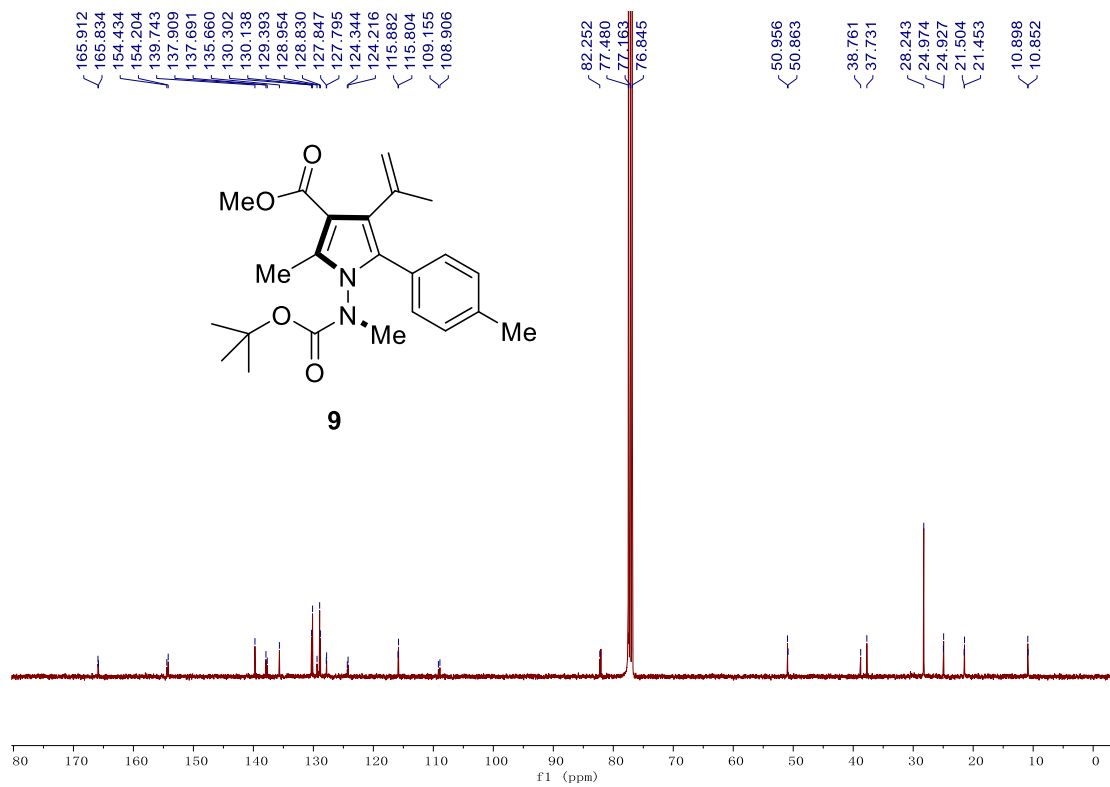

Supplement: d4cc06721e1.pdf [file d4cc06721e1.pdf]
